# Supplementary material for: Exploring N-acyl-4-azatetracyclo[5.3.2.02,6.08,10]dodec-11-enes as 11β-HSD1 Inhibitors
Source: PubMed Central journal article supplement (PMC6017749; doi:10.3390/molecules23030536), 2018-02-28

## Supplementary Material for

# Exploring *N*-acyl-4-azatetracyclo[5.3.2.0<sup>2,6</sup>.0<sup>8,10</sup>]dodec-11- enes as 11 $\beta$ -HSD1 inhibitors

Rosana Leiva<sup>a</sup>, Andrew McBride<sup>b</sup>, Margaret Binnie<sup>b</sup>, Scott P. Webster<sup>b</sup>,  
and Santiago Vázquez<sup>a,\*</sup>

<sup>a</sup> *Laboratori de Química Farmacèutica (Unitat Associada al CSIC), Facultat de Farmàcia i Ciències de l'Alimentació, and Institute of Biomedicine (IBUB), Universitat de Barcelona, Av. Joan XXIII, 27-31, Barcelona, E-08028, Spain*

<sup>b</sup> *Centre for Cardiovascular Science, University of Edinburgh, Queen's Medical Research Institute, EH16 4TJ, United Kingdom*

### INDEX

|                                                             |     |
|-------------------------------------------------------------|-----|
| <sup>1</sup> H and <sup>13</sup> C NMR spectra of <b>4</b>  | S3  |
| <sup>1</sup> H and <sup>13</sup> C NMR spectra of <b>5</b>  | S5  |
| <sup>1</sup> H and <sup>13</sup> C NMR spectra of <b>6</b>  | S7  |
| <sup>1</sup> H and <sup>13</sup> C NMR spectra of <b>7</b>  | S9  |
| <sup>1</sup> H and <sup>13</sup> C NMR spectra of <b>8</b>  | S11 |
| <sup>1</sup> H and <sup>13</sup> C NMR spectra of <b>9</b>  | S13 |
| <sup>1</sup> H and <sup>13</sup> C NMR spectra of <b>10</b> | S15 |
| <sup>1</sup> H and <sup>13</sup> C NMR spectra of <b>11</b> | S17 |
| <sup>1</sup> H and <sup>13</sup> C NMR spectra of <b>12</b> | S19 |
| <sup>1</sup> H and <sup>13</sup> C NMR spectra of <b>13</b> | S21 |
| <sup>1</sup> H and <sup>13</sup> C NMR spectra of <b>14</b> | S23 |
| <sup>1</sup> H and <sup>13</sup> C NMR spectra of <b>15</b> | S25 |
| <sup>1</sup> H and <sup>13</sup> C NMR spectra of <b>16</b> | S27 |



4

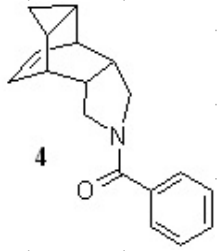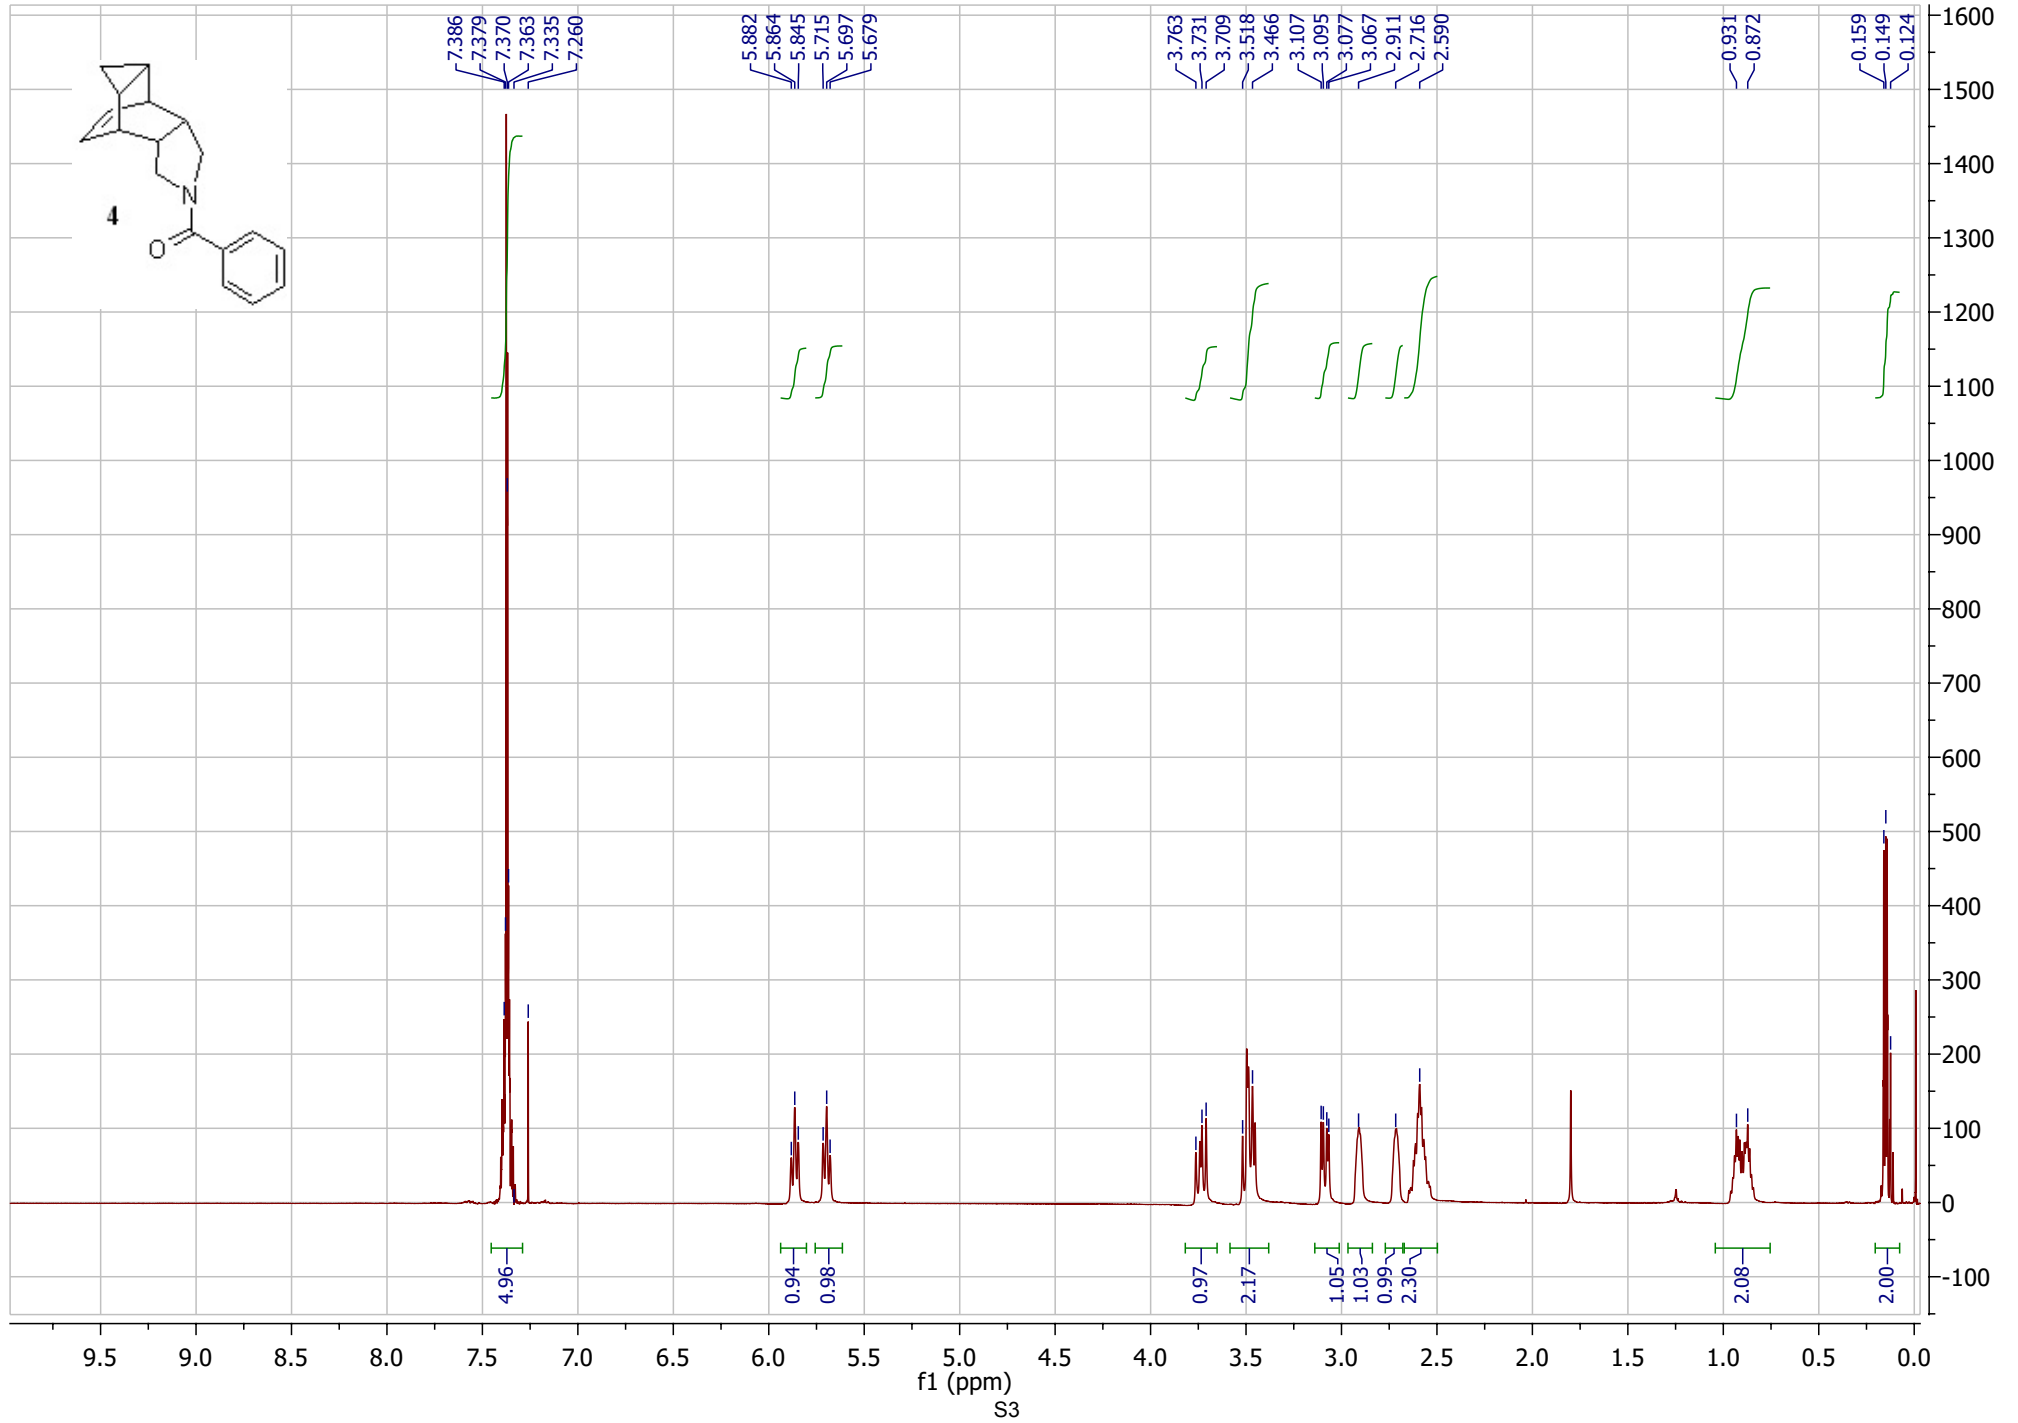

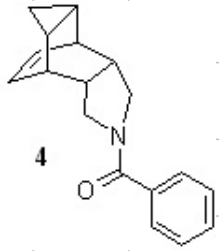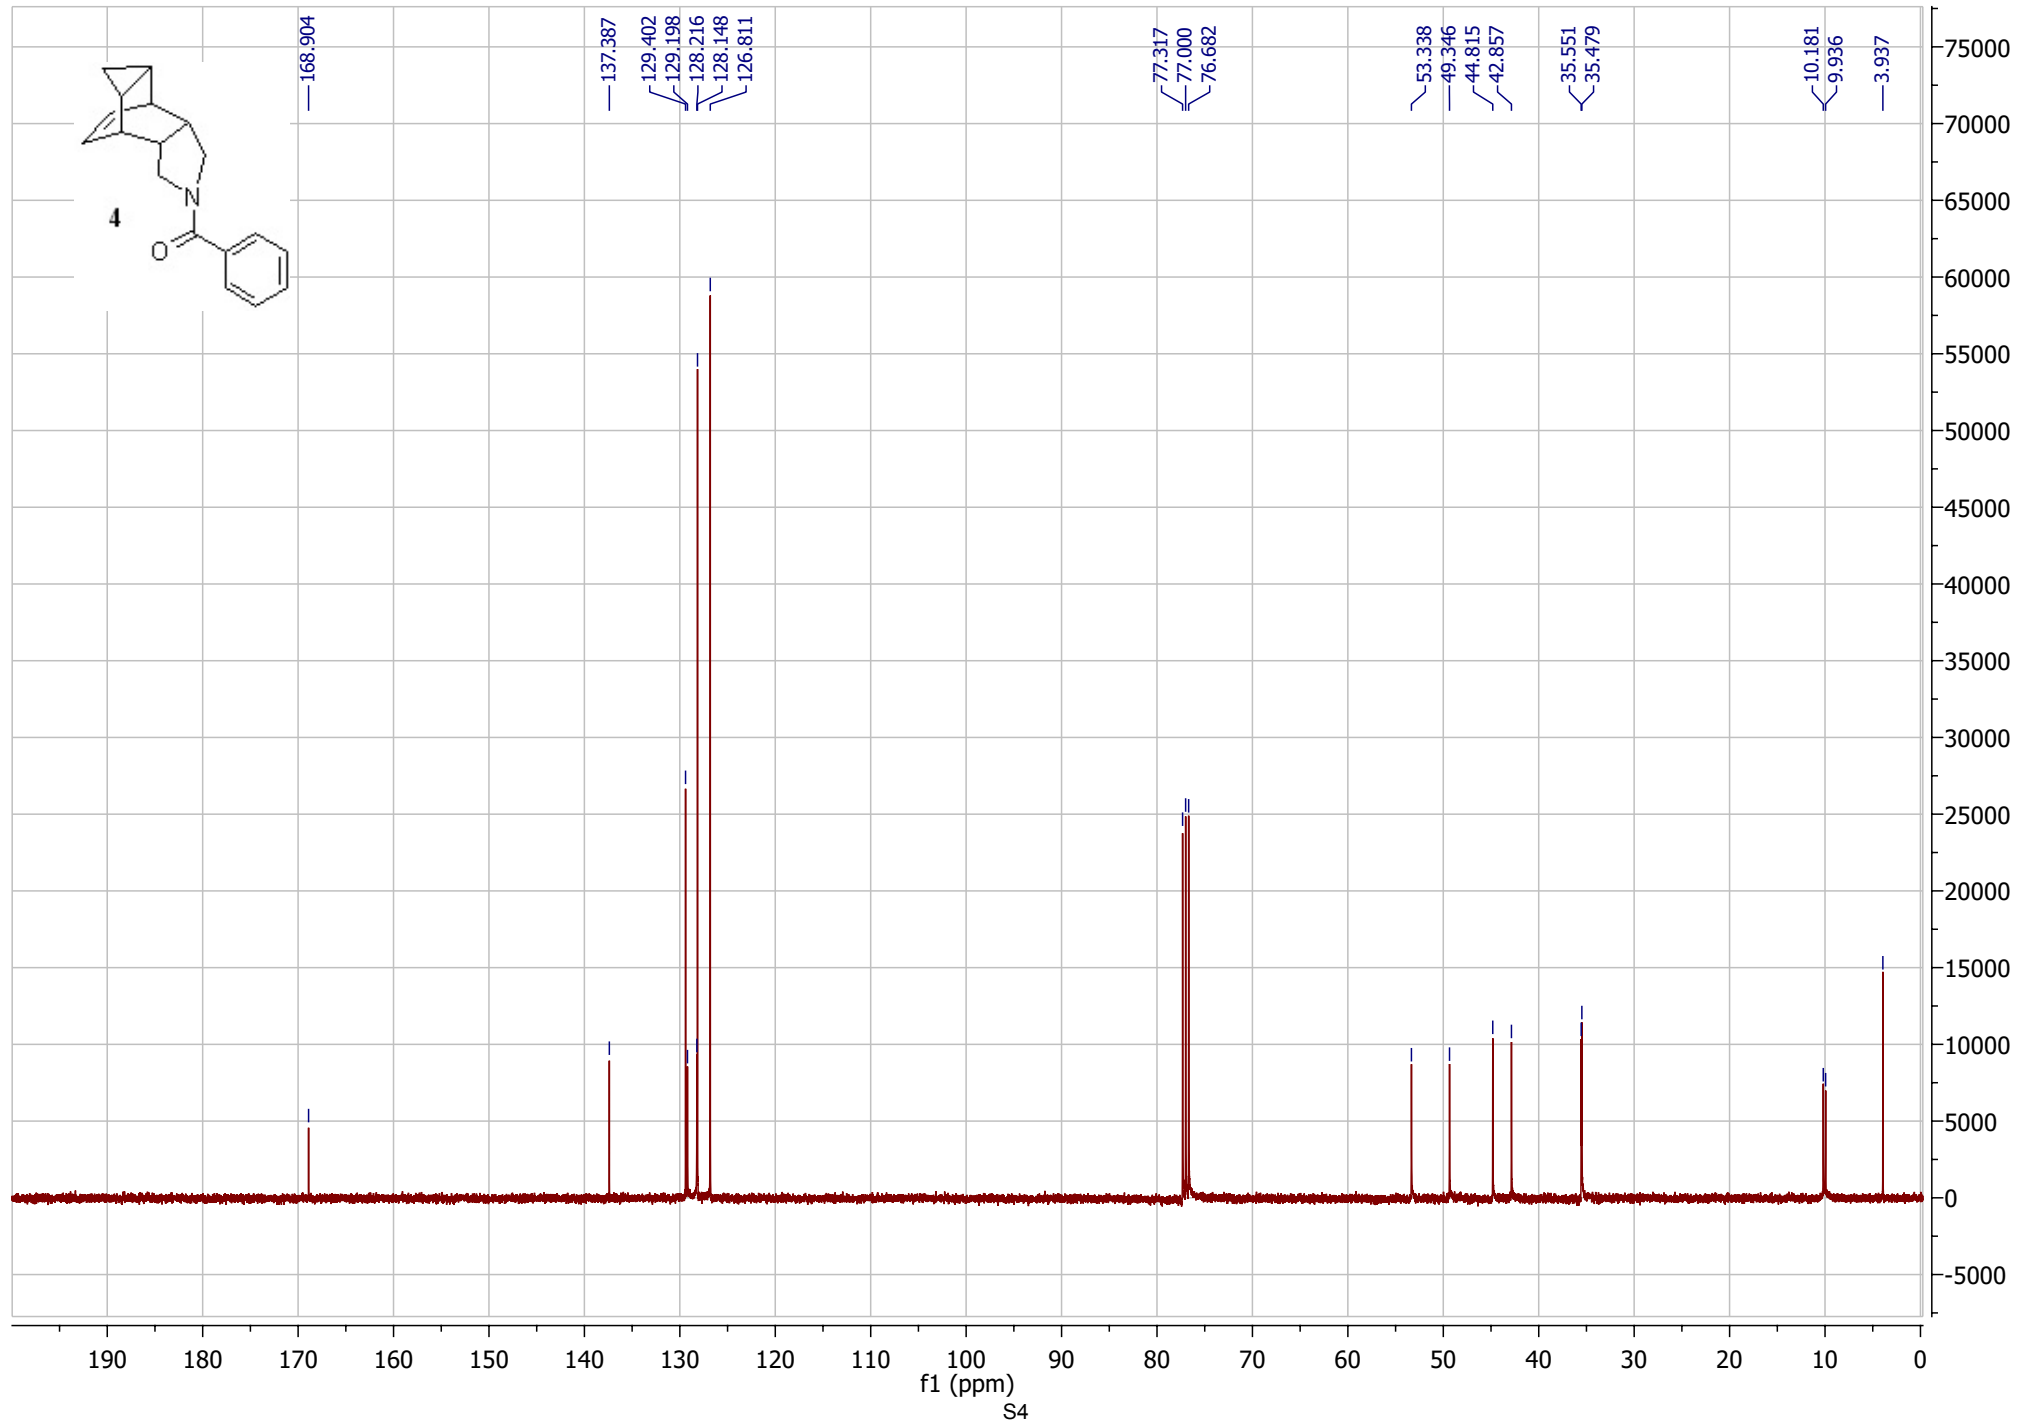

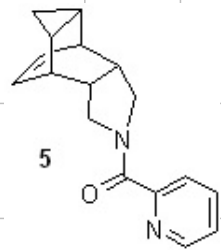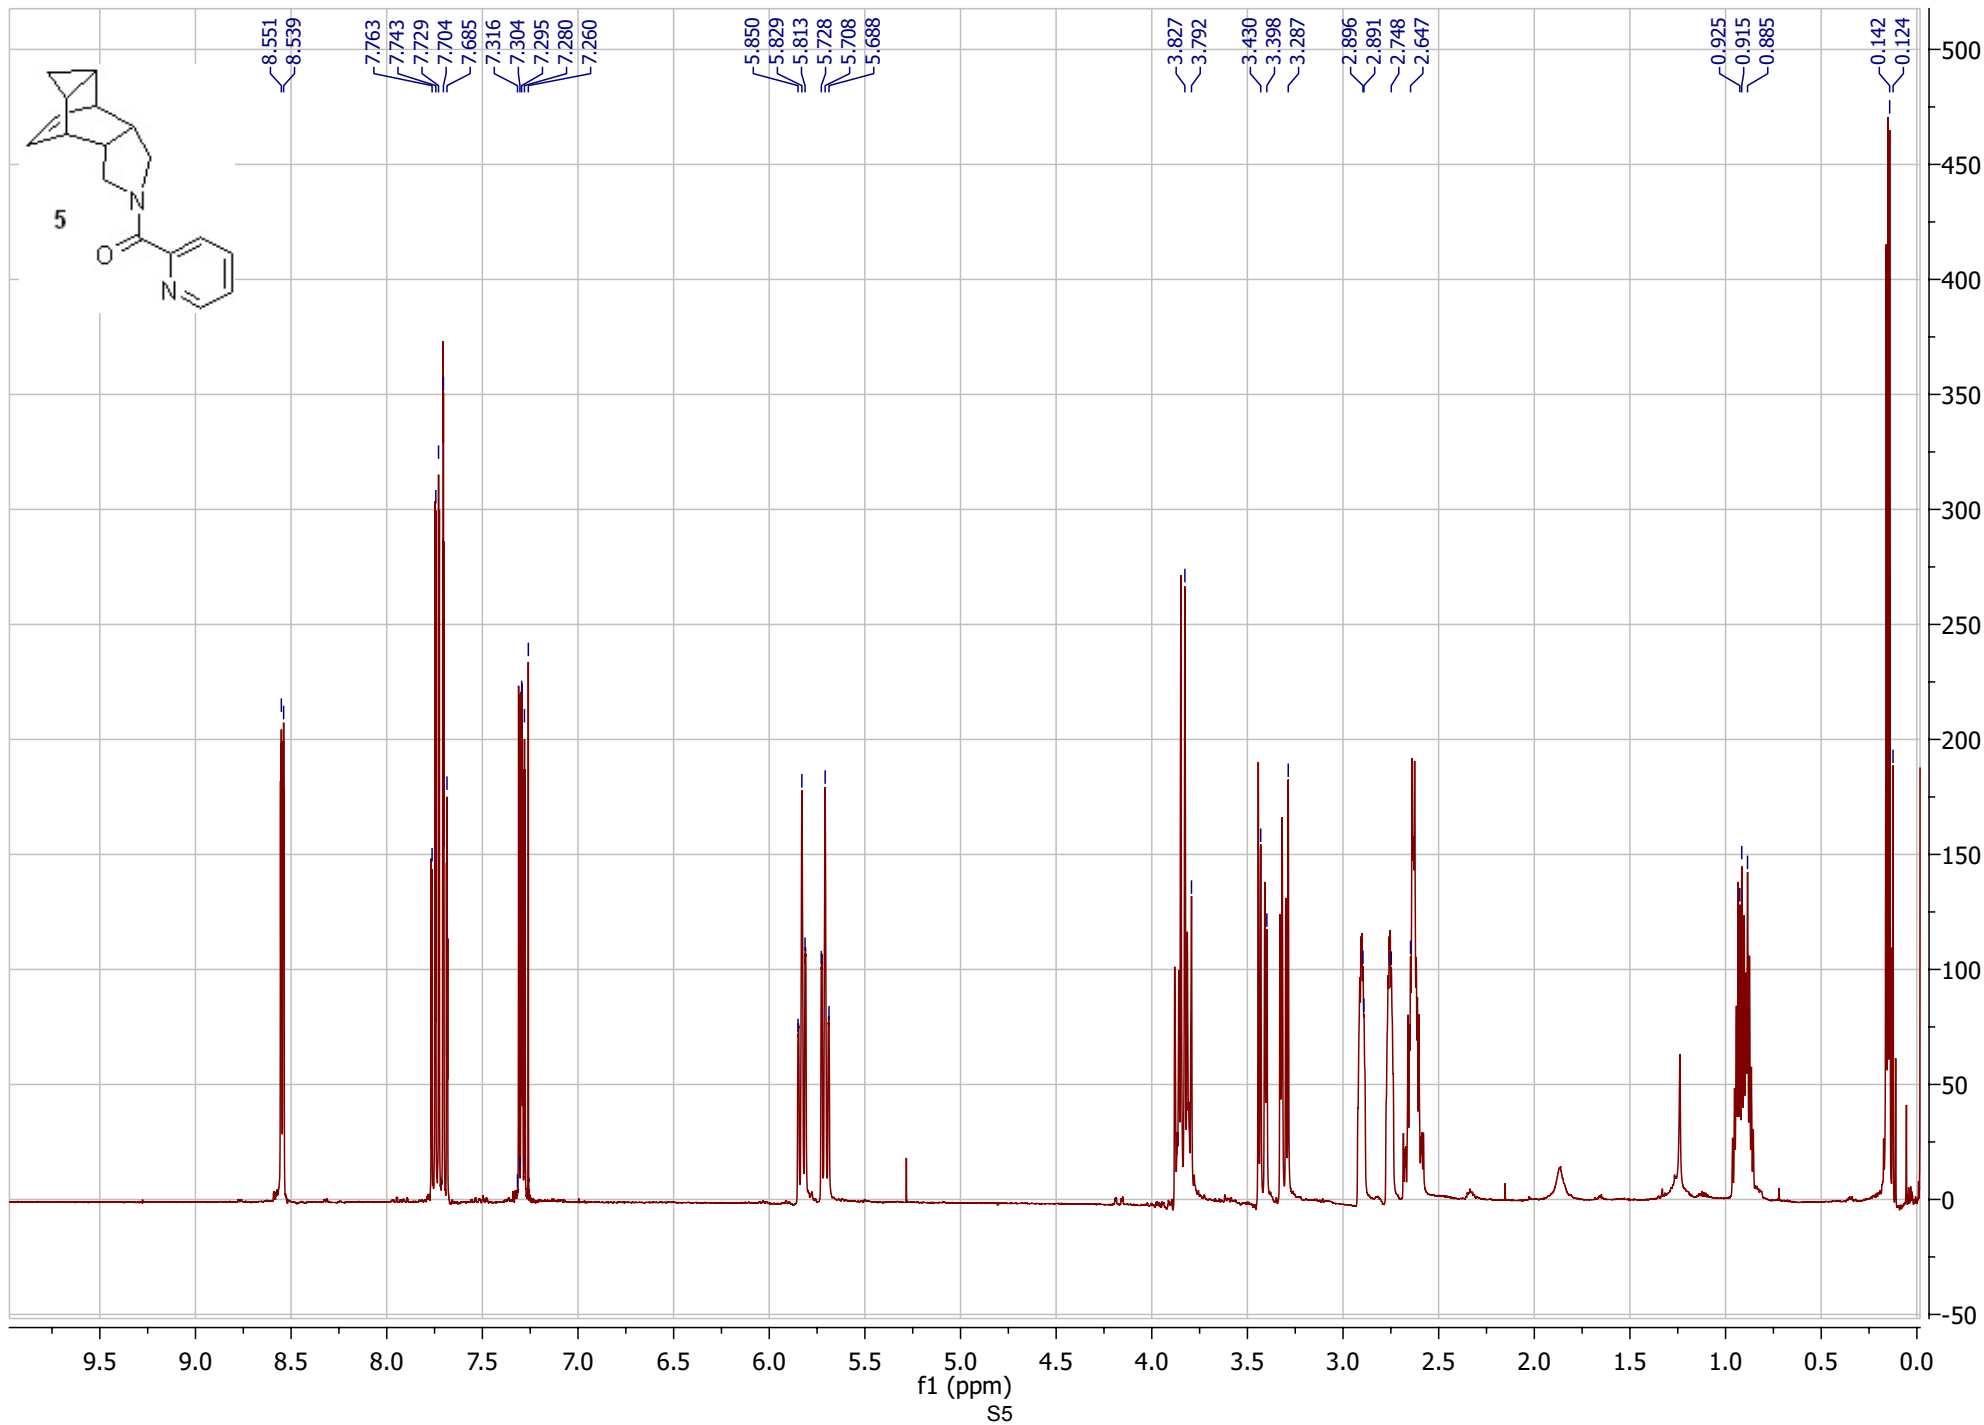

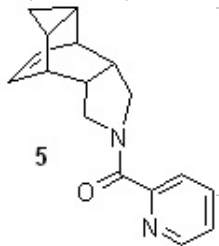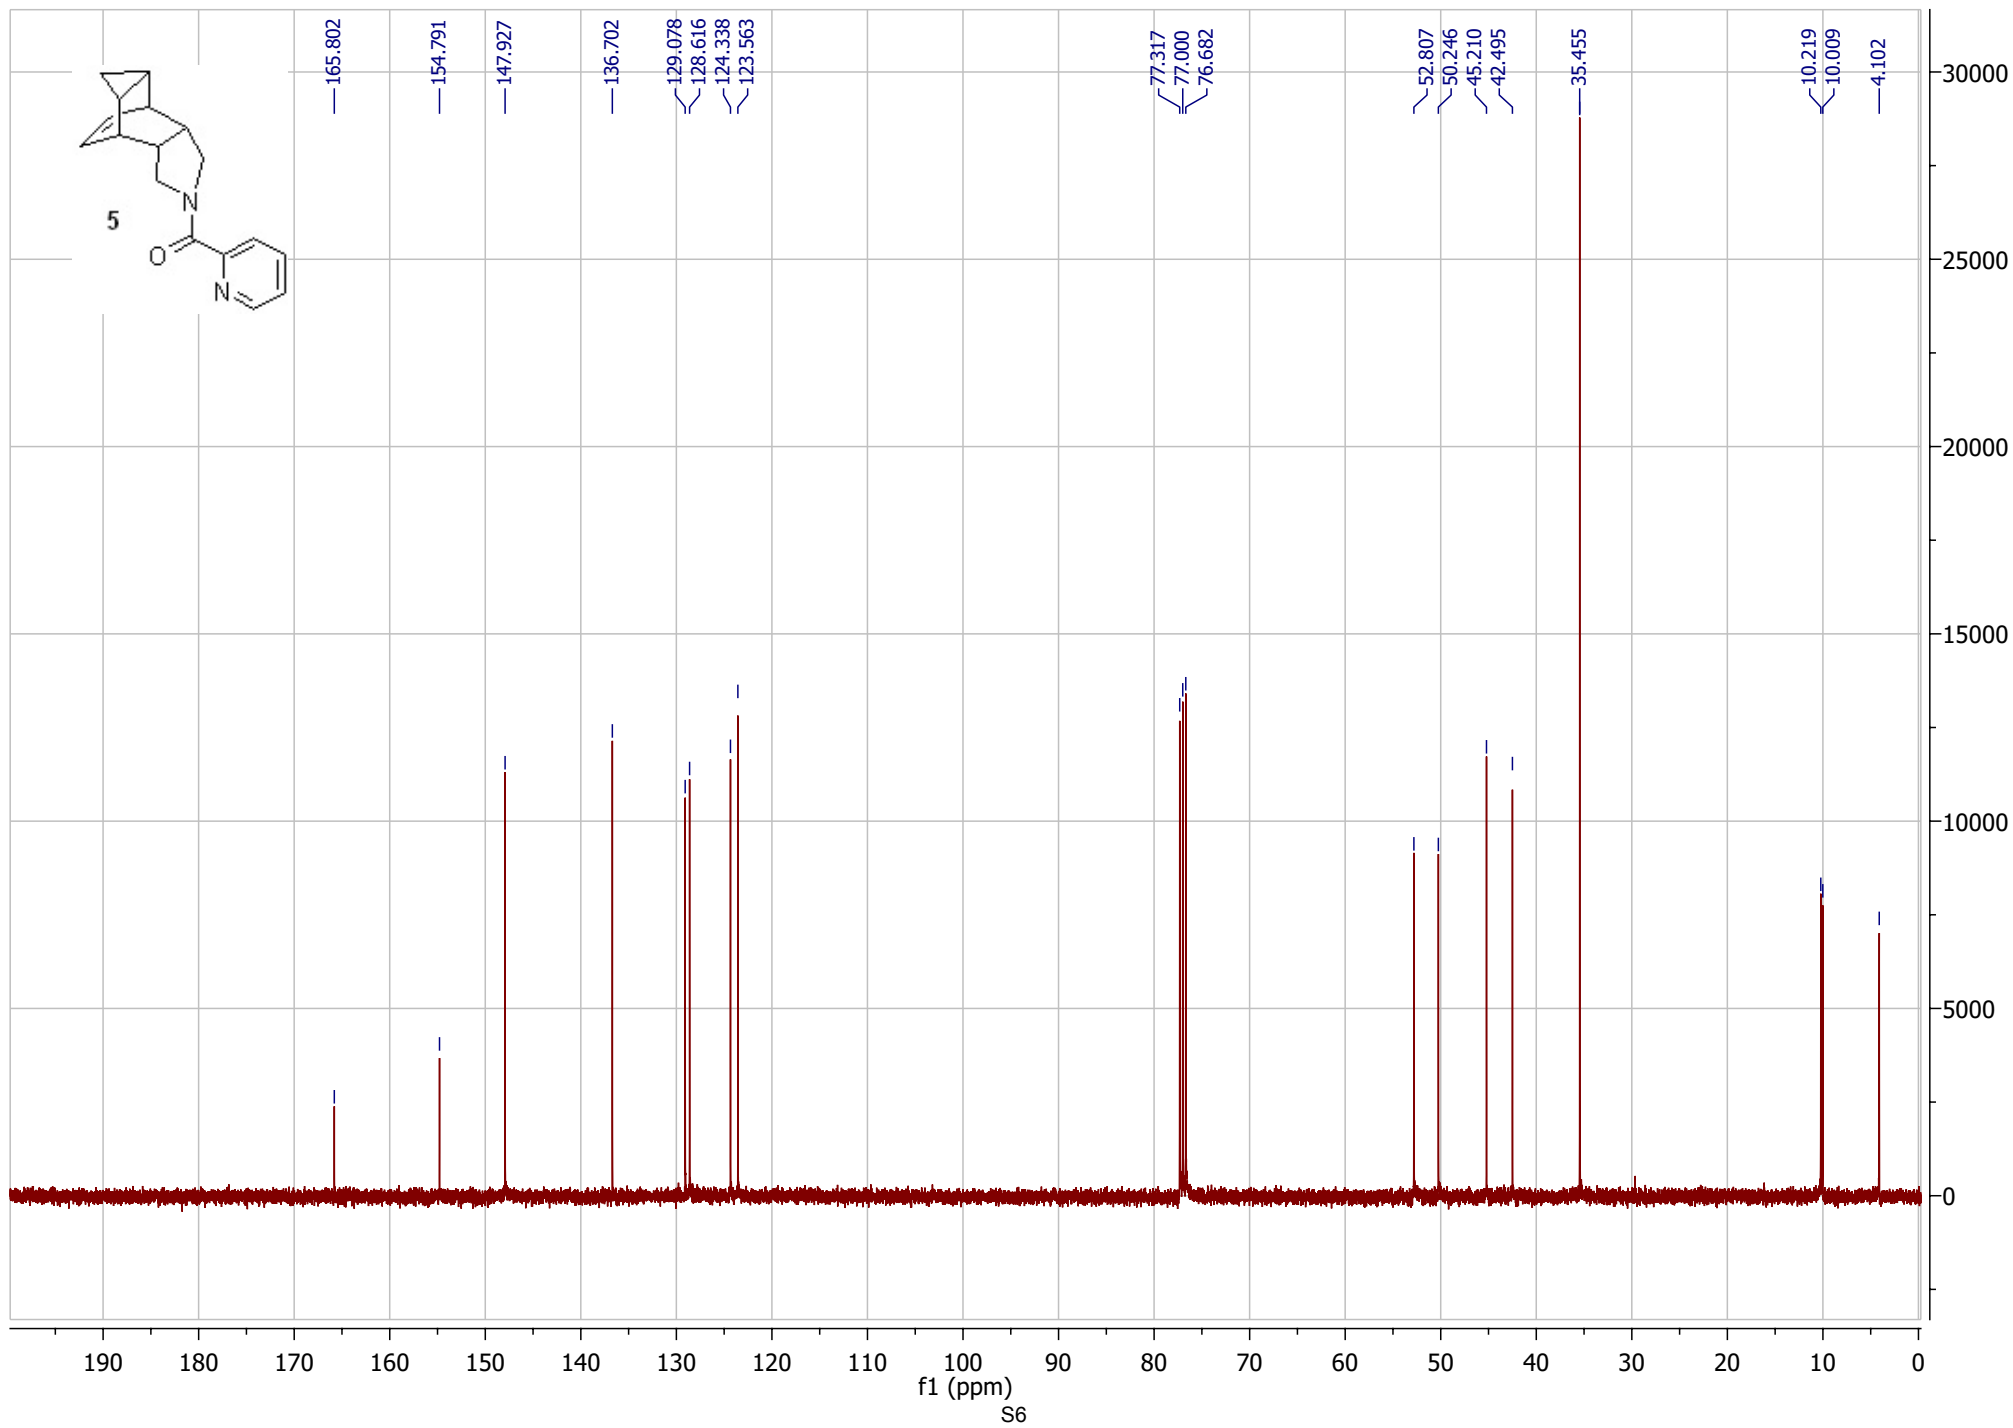

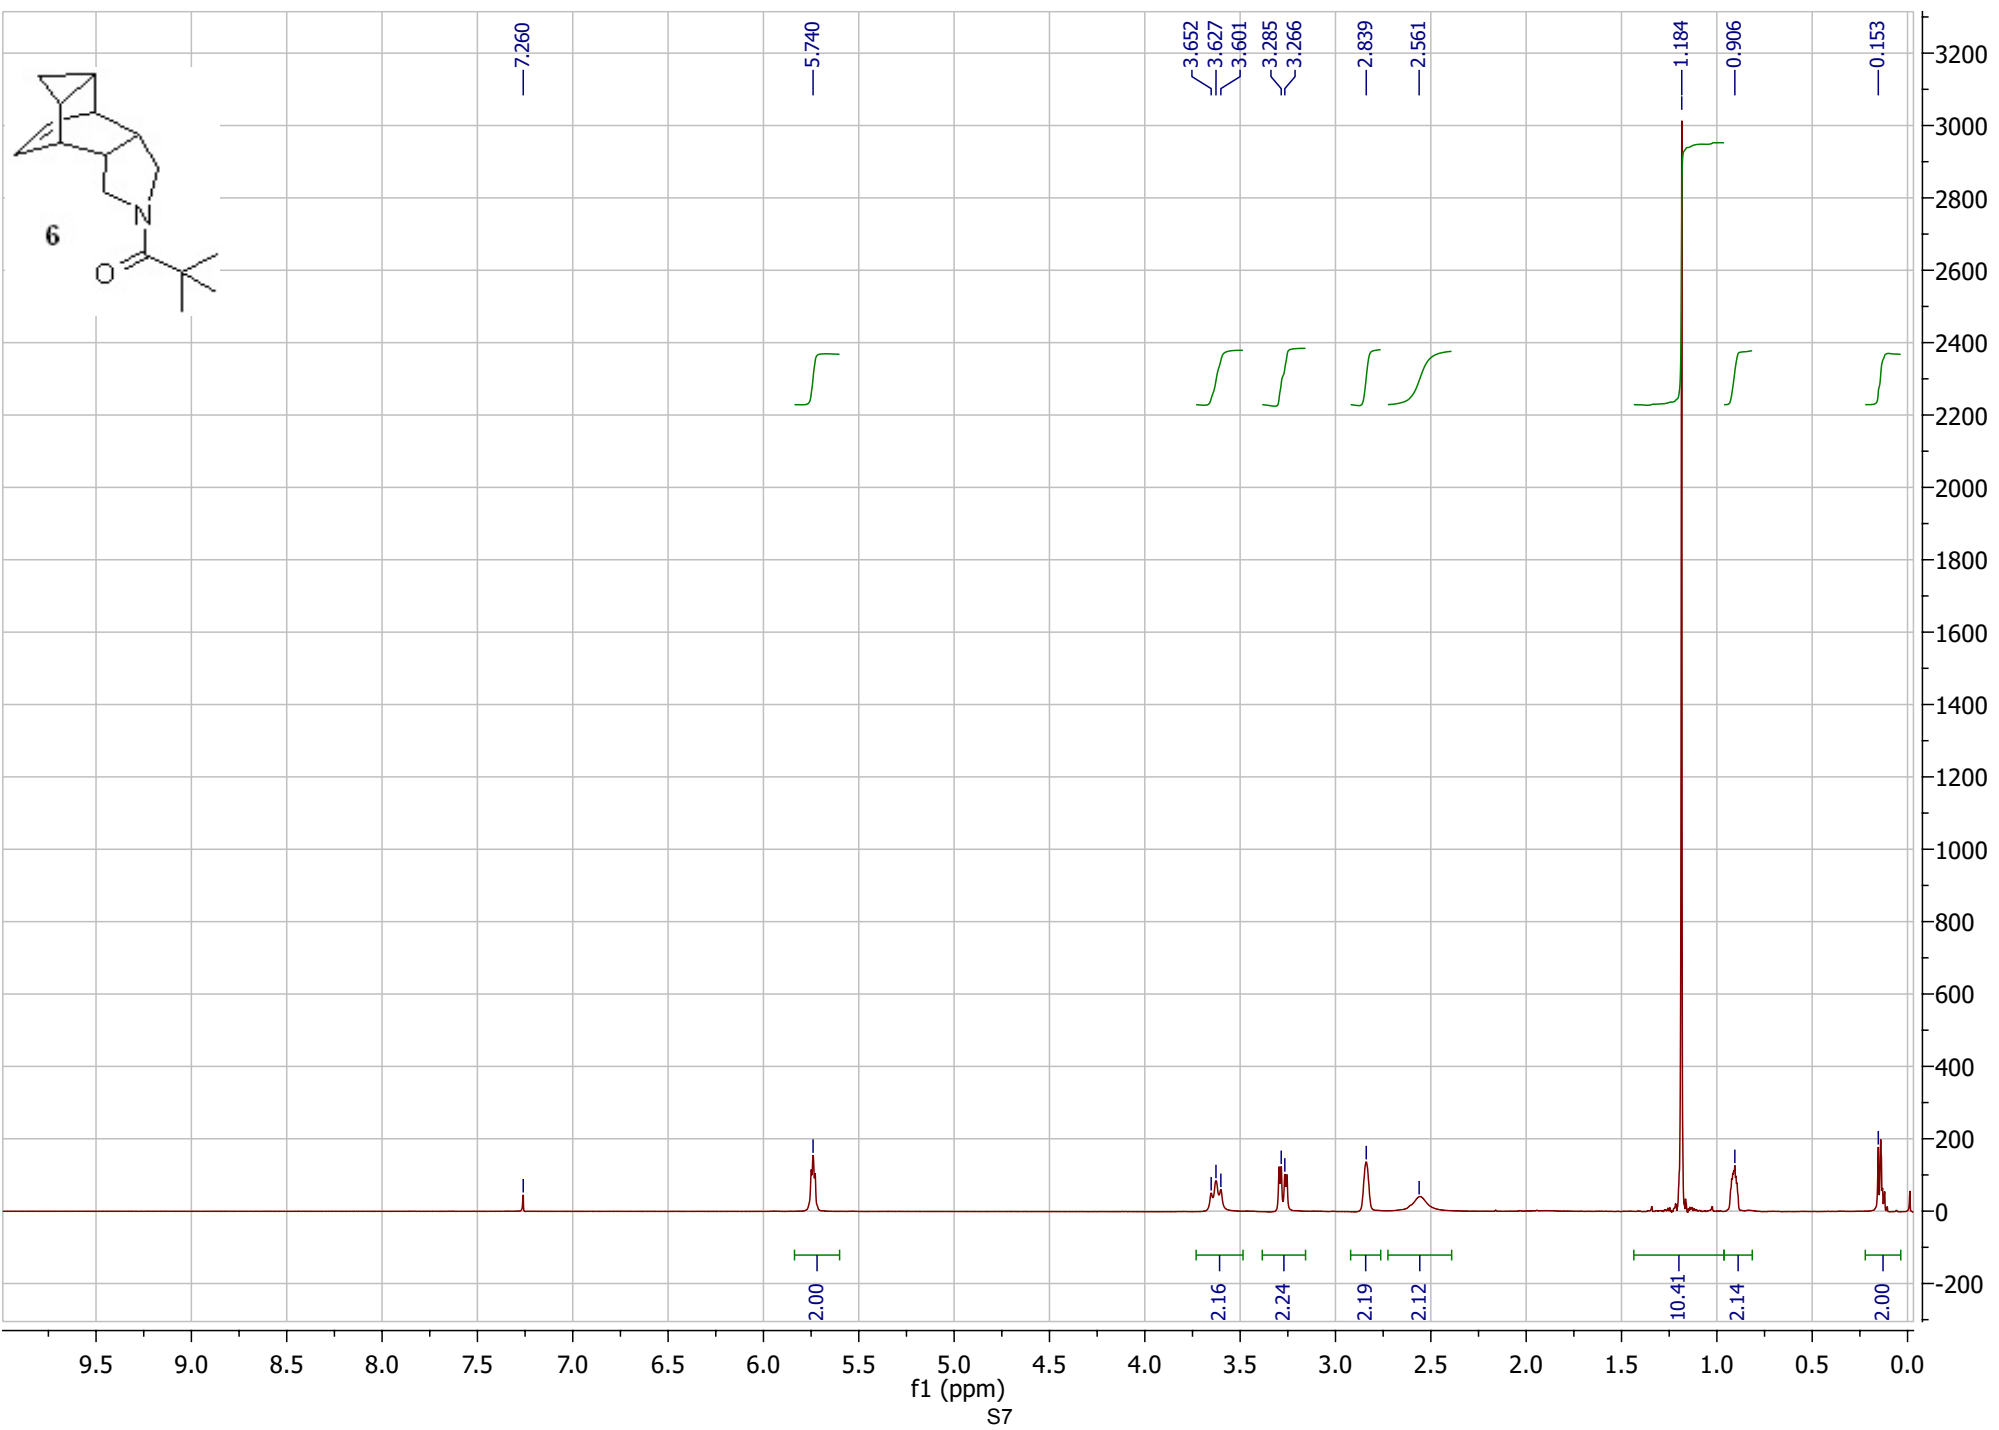

f1 (ppm)

S7

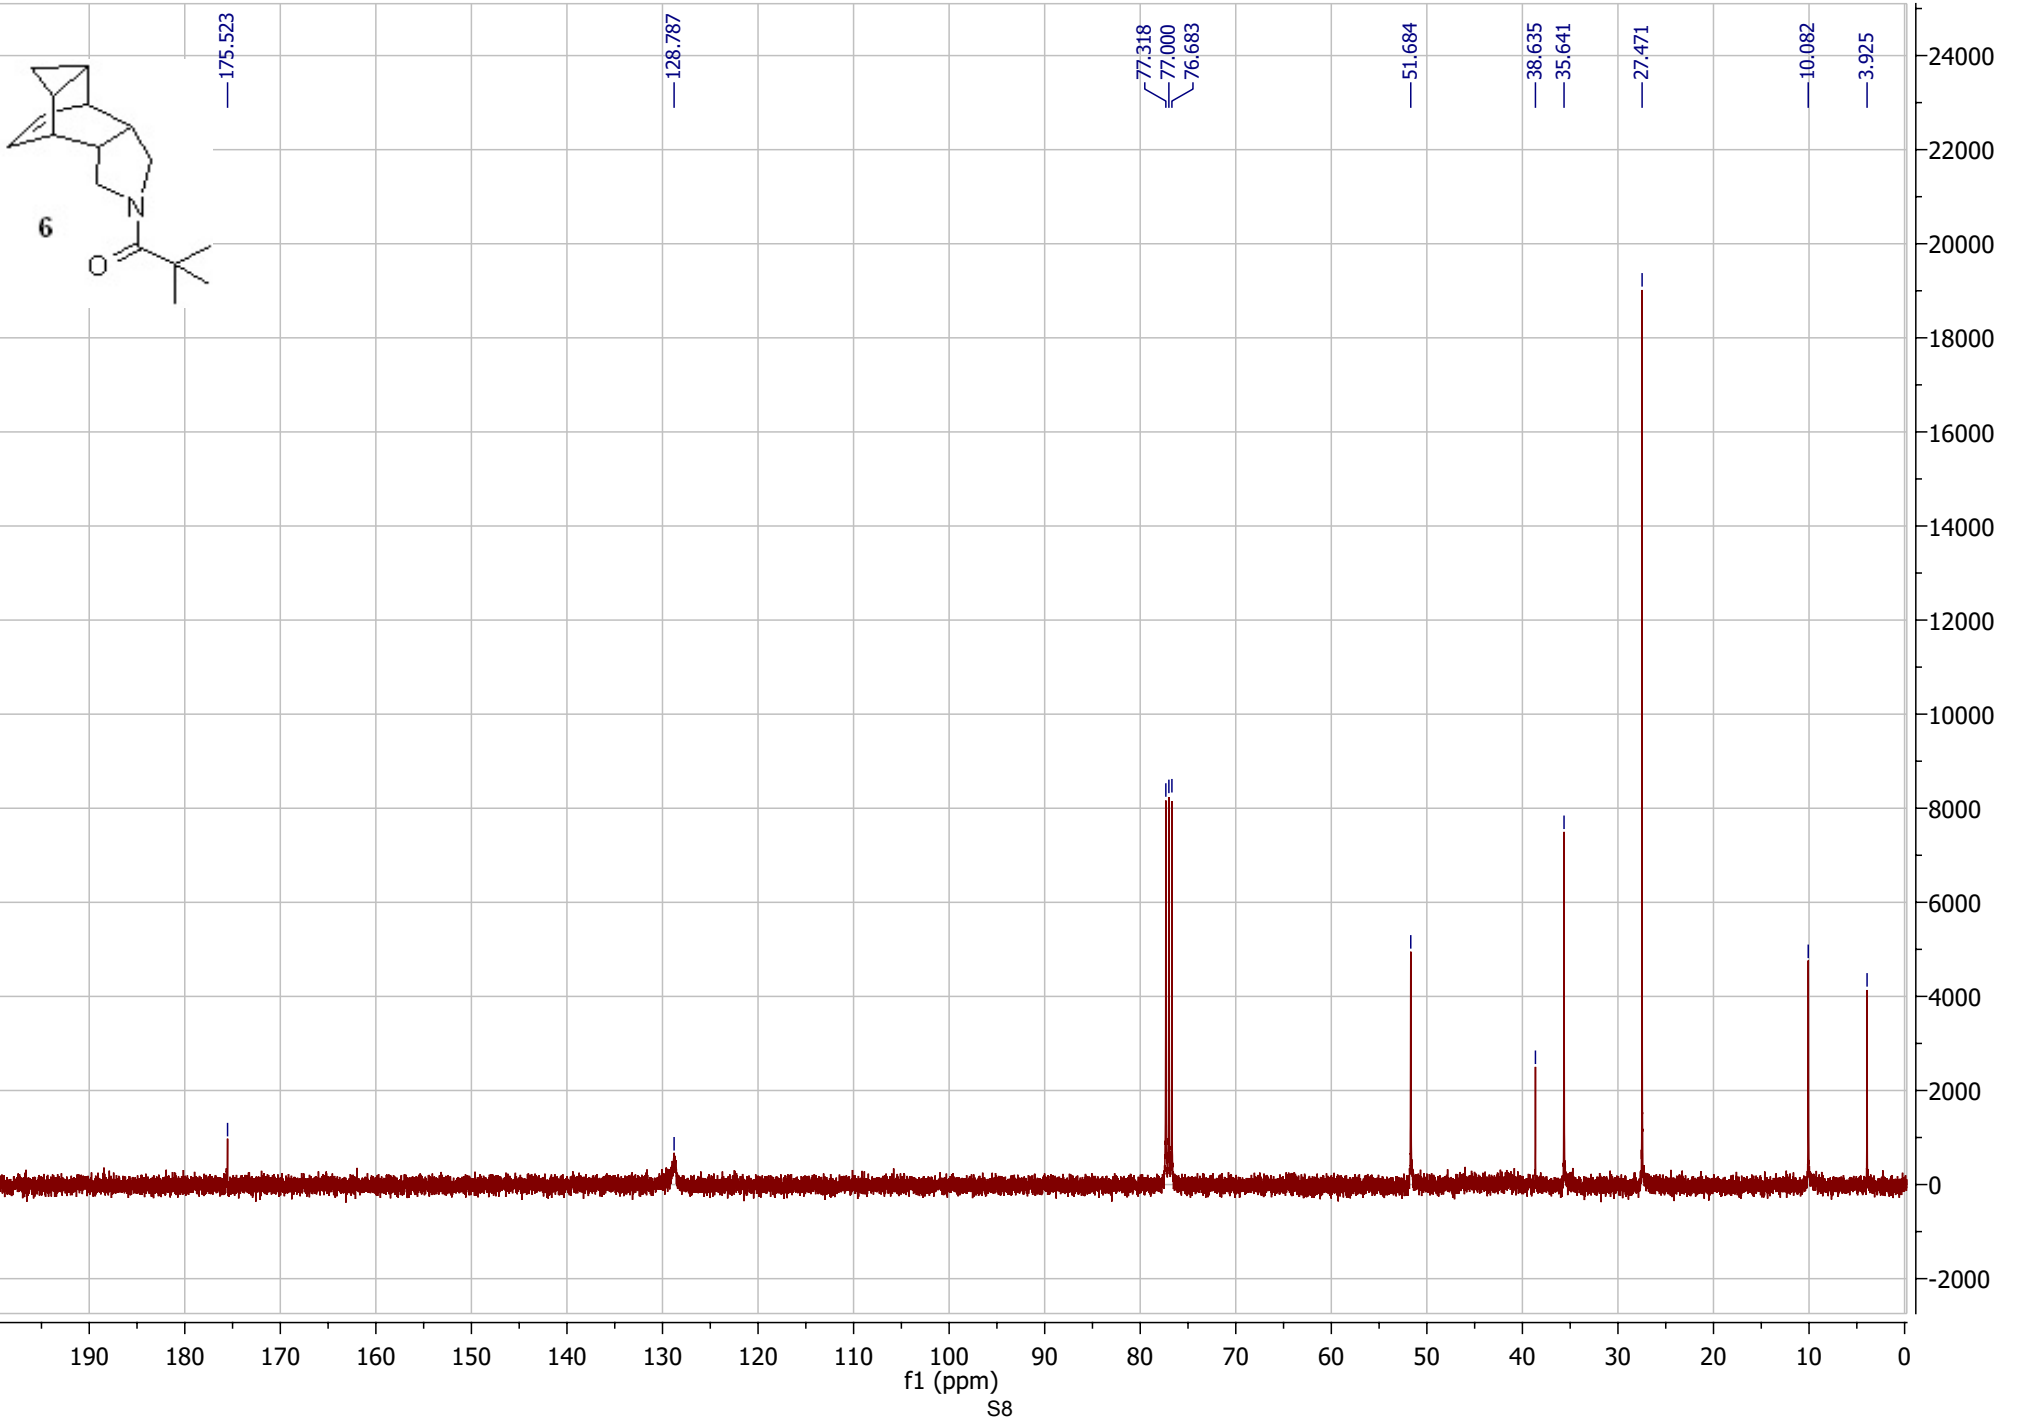



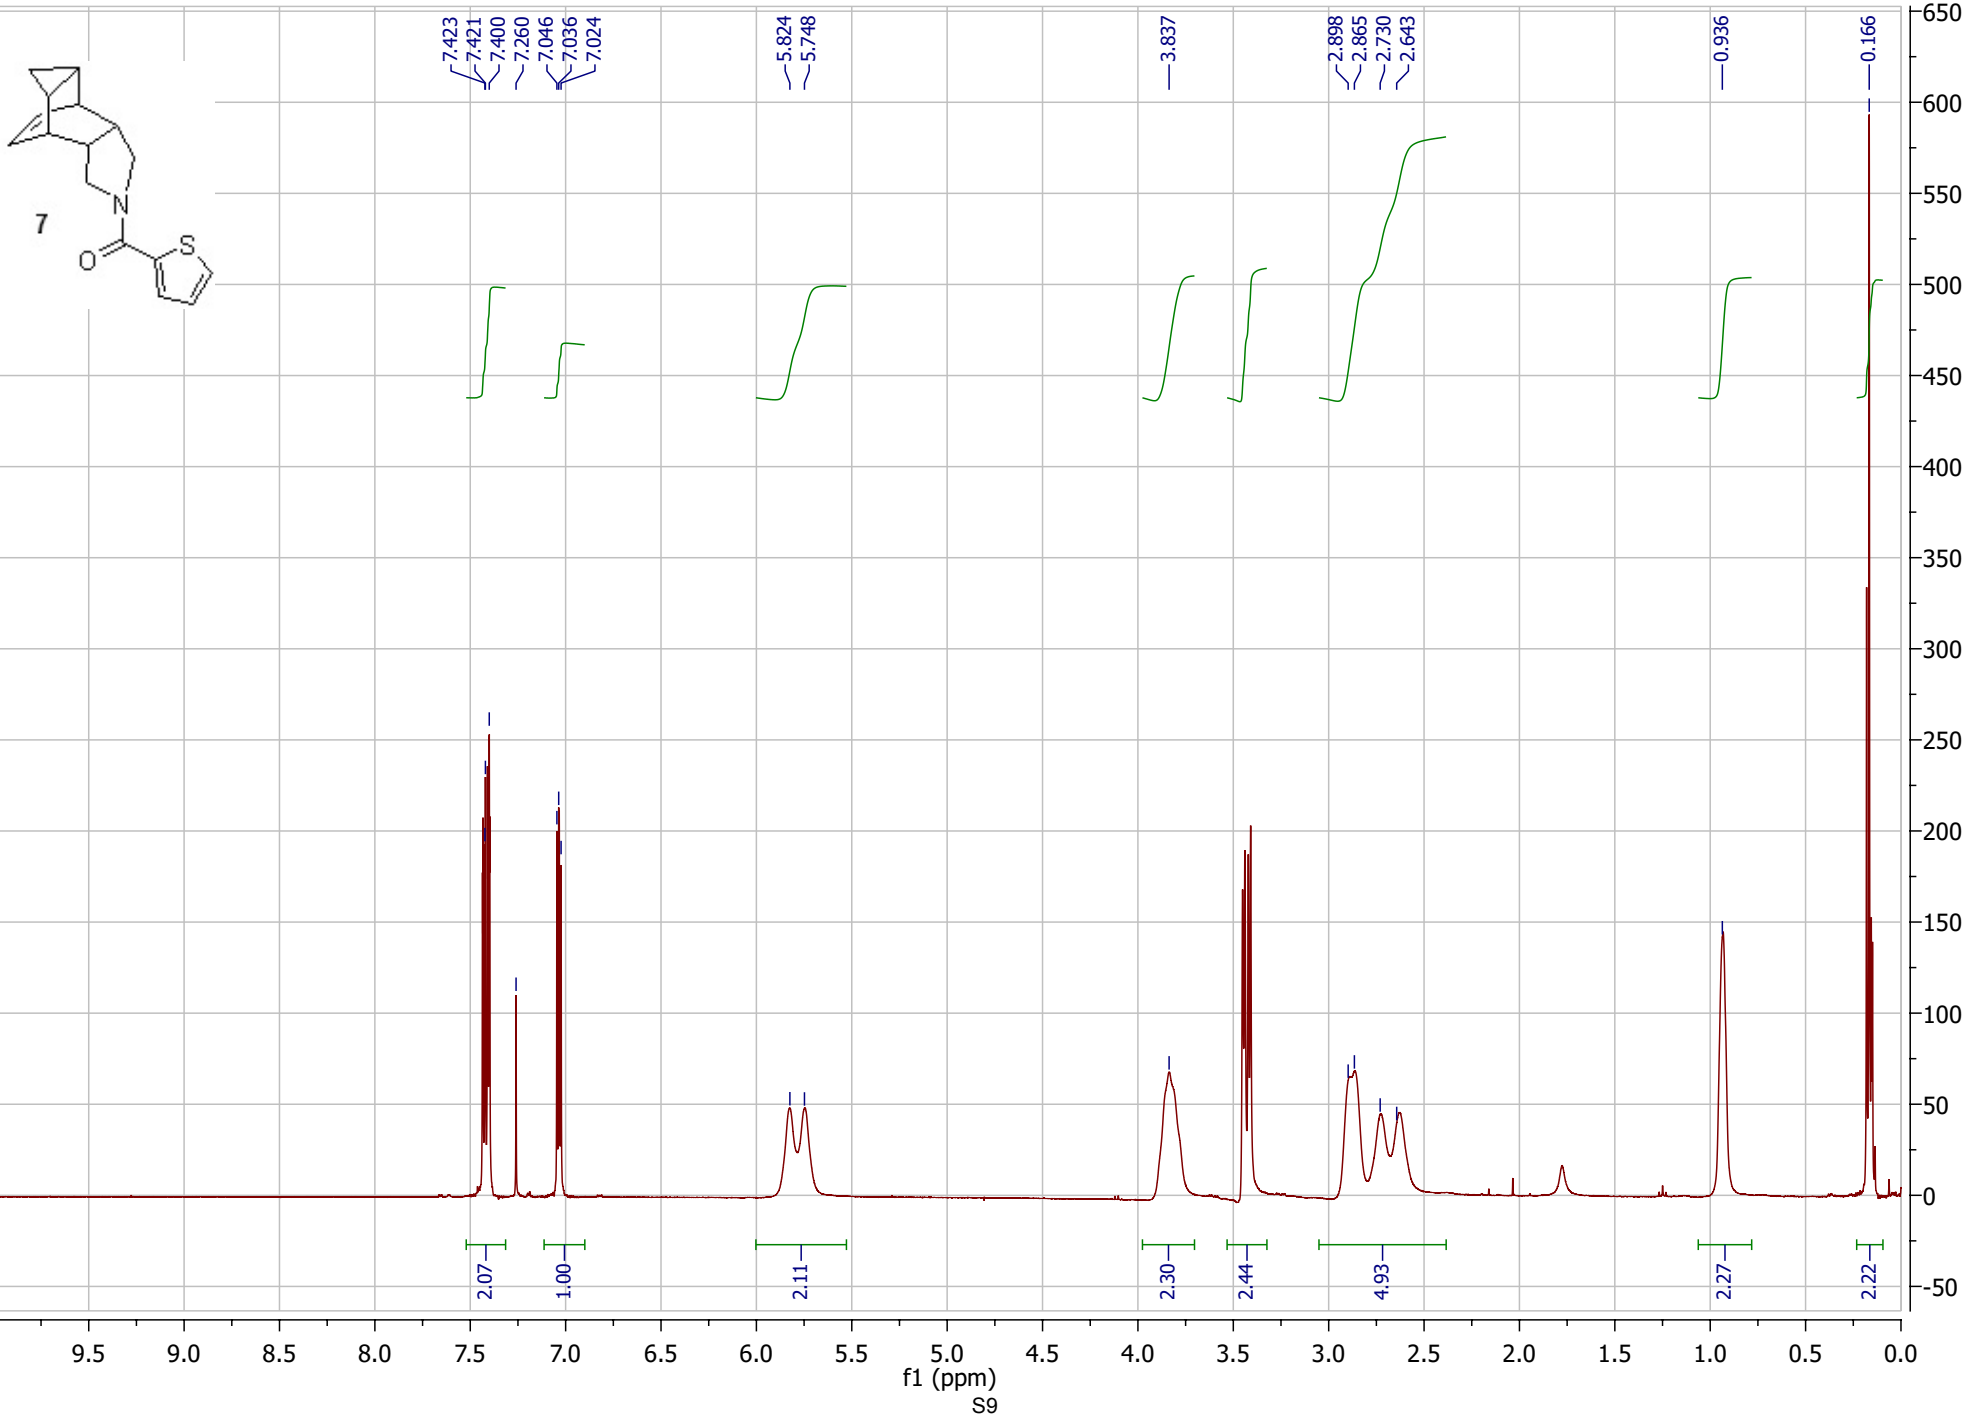

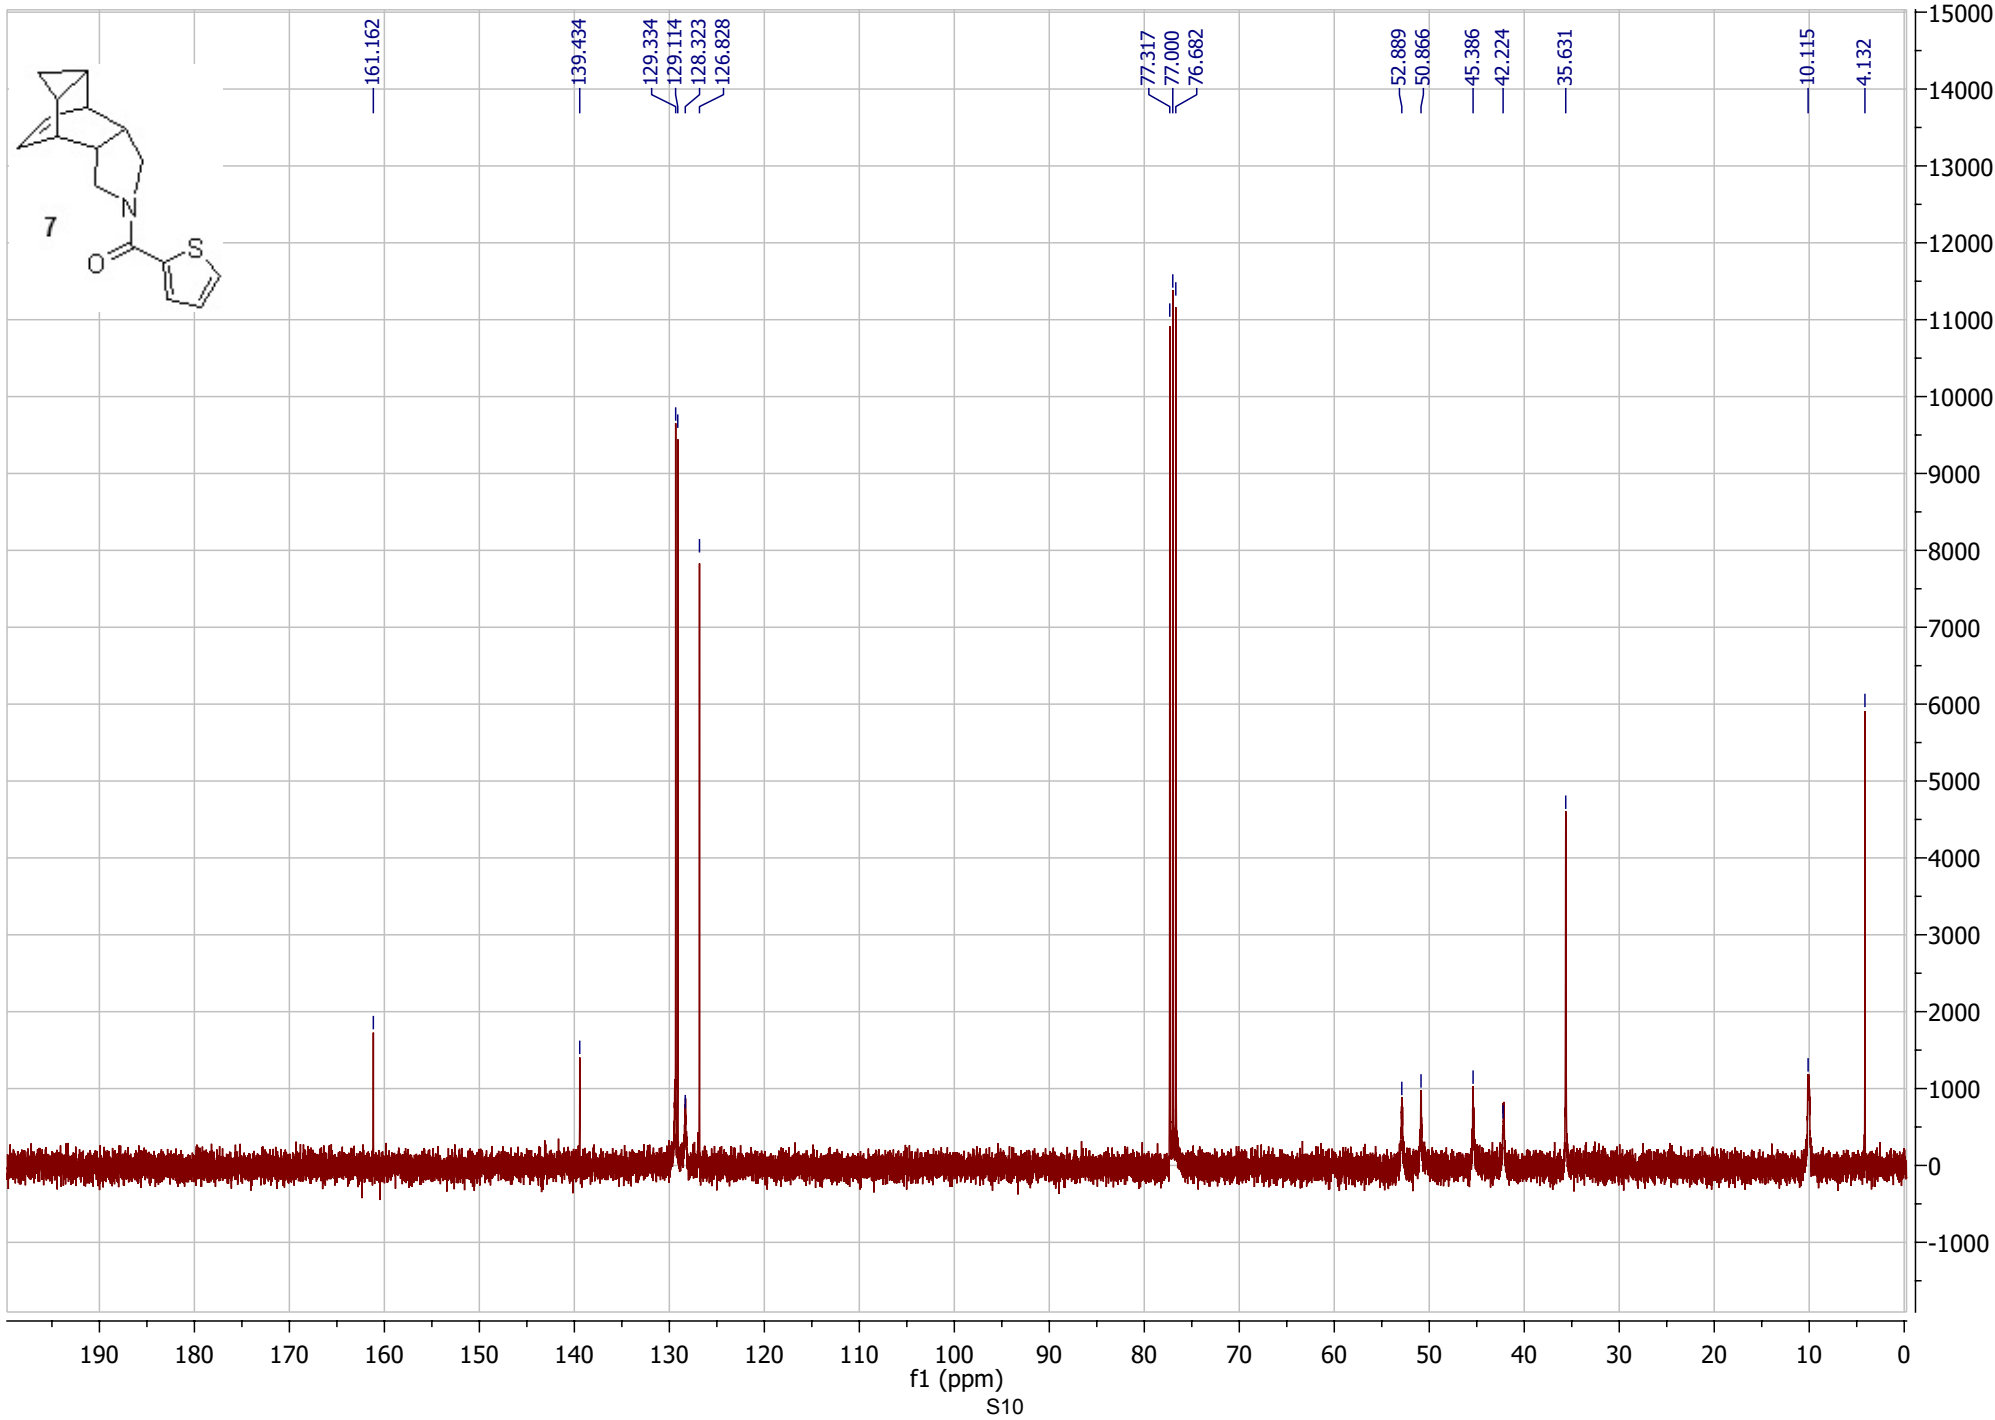

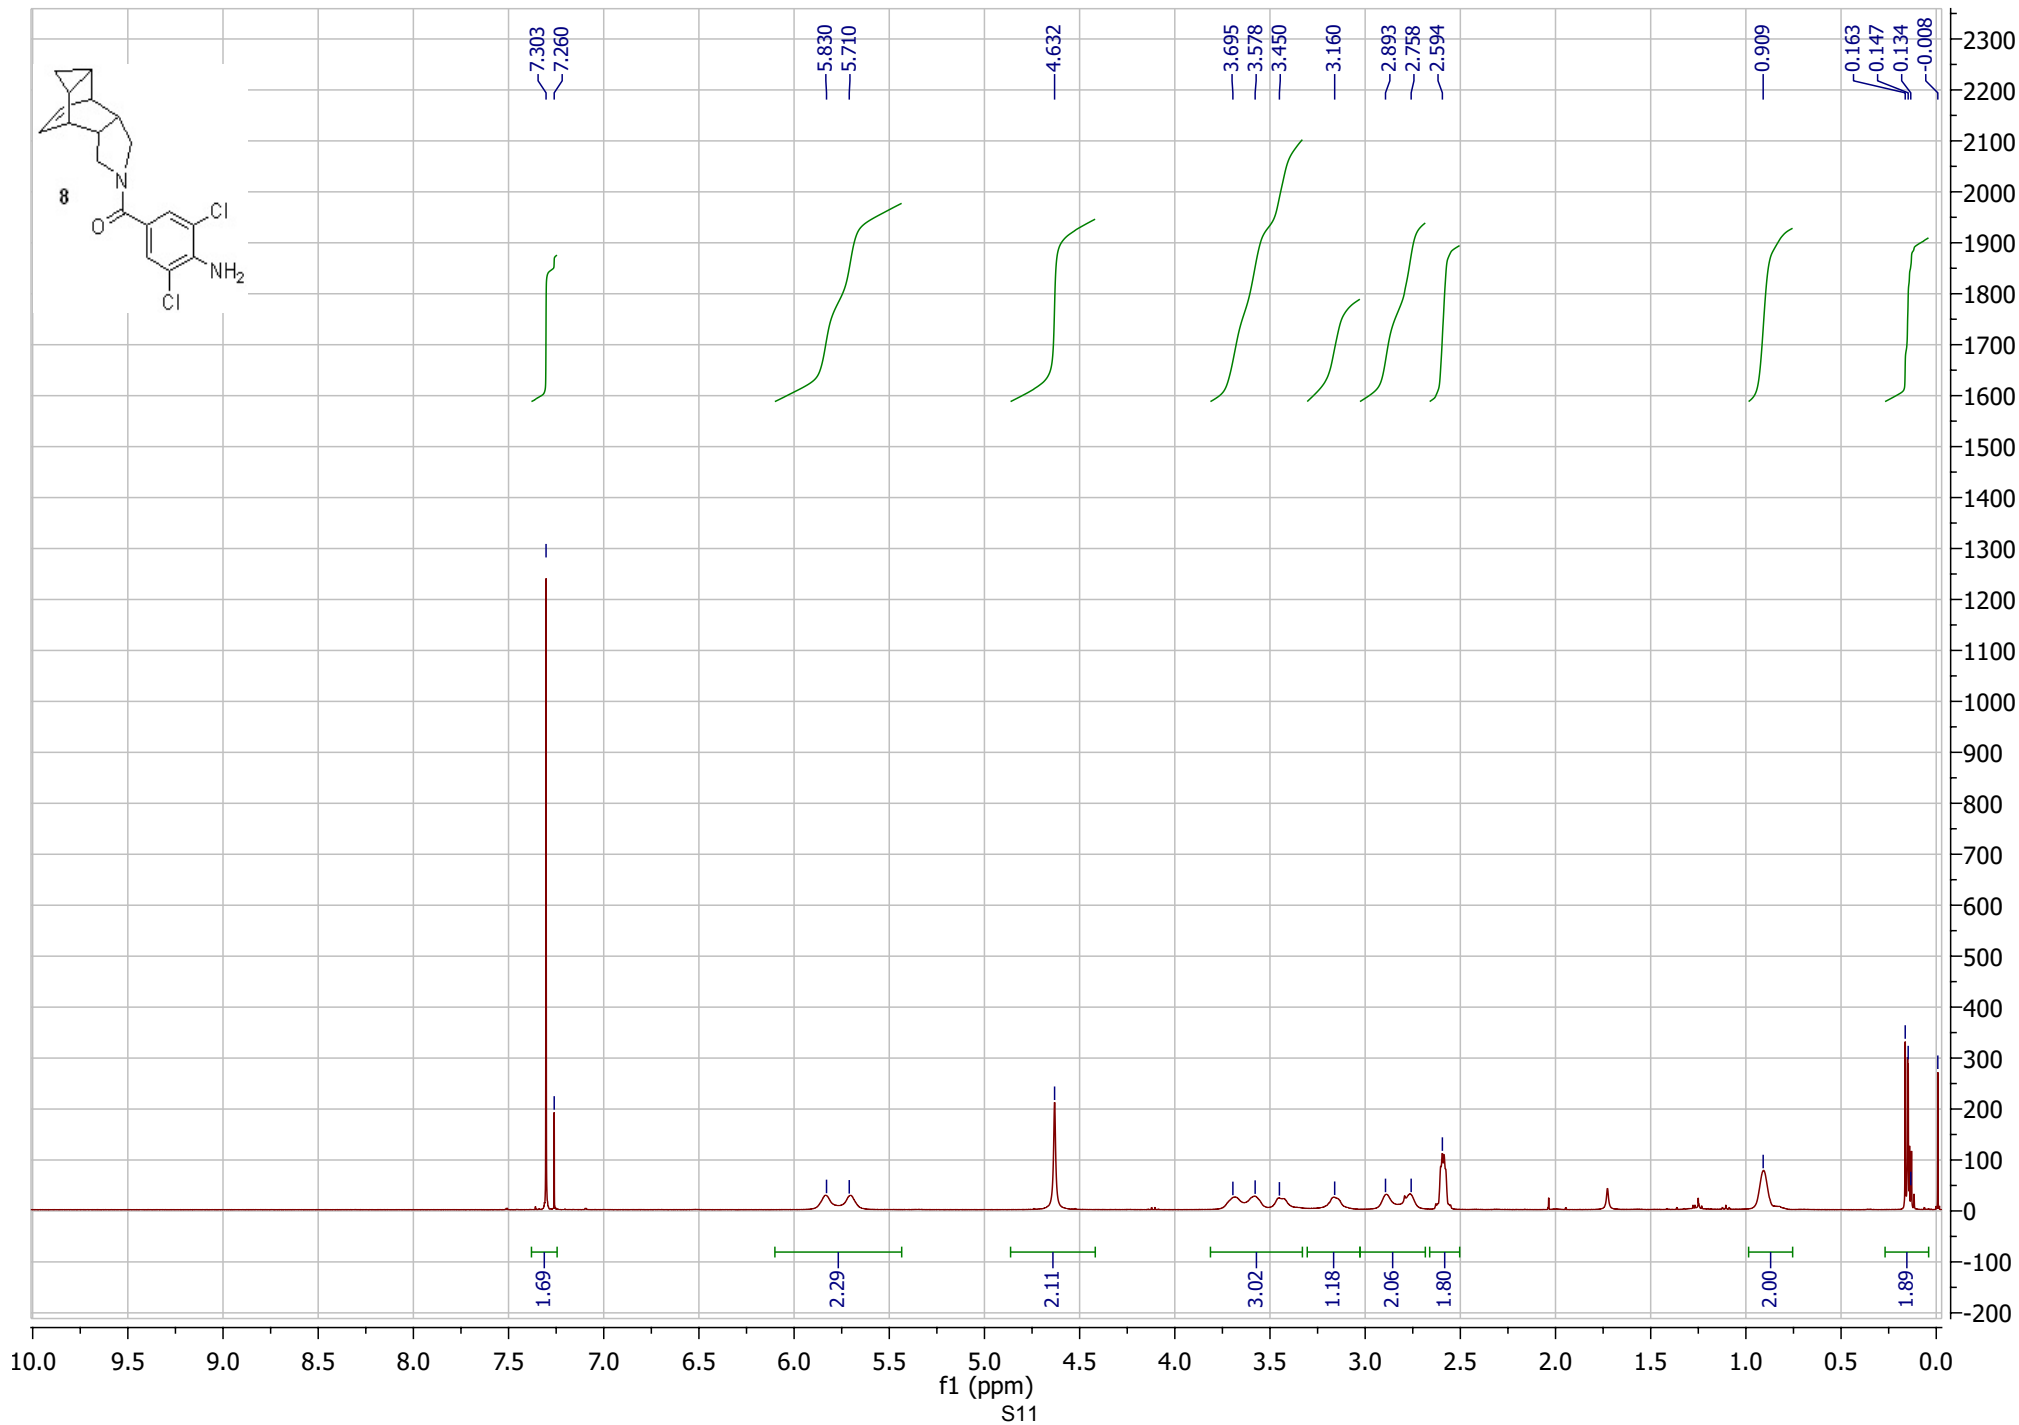

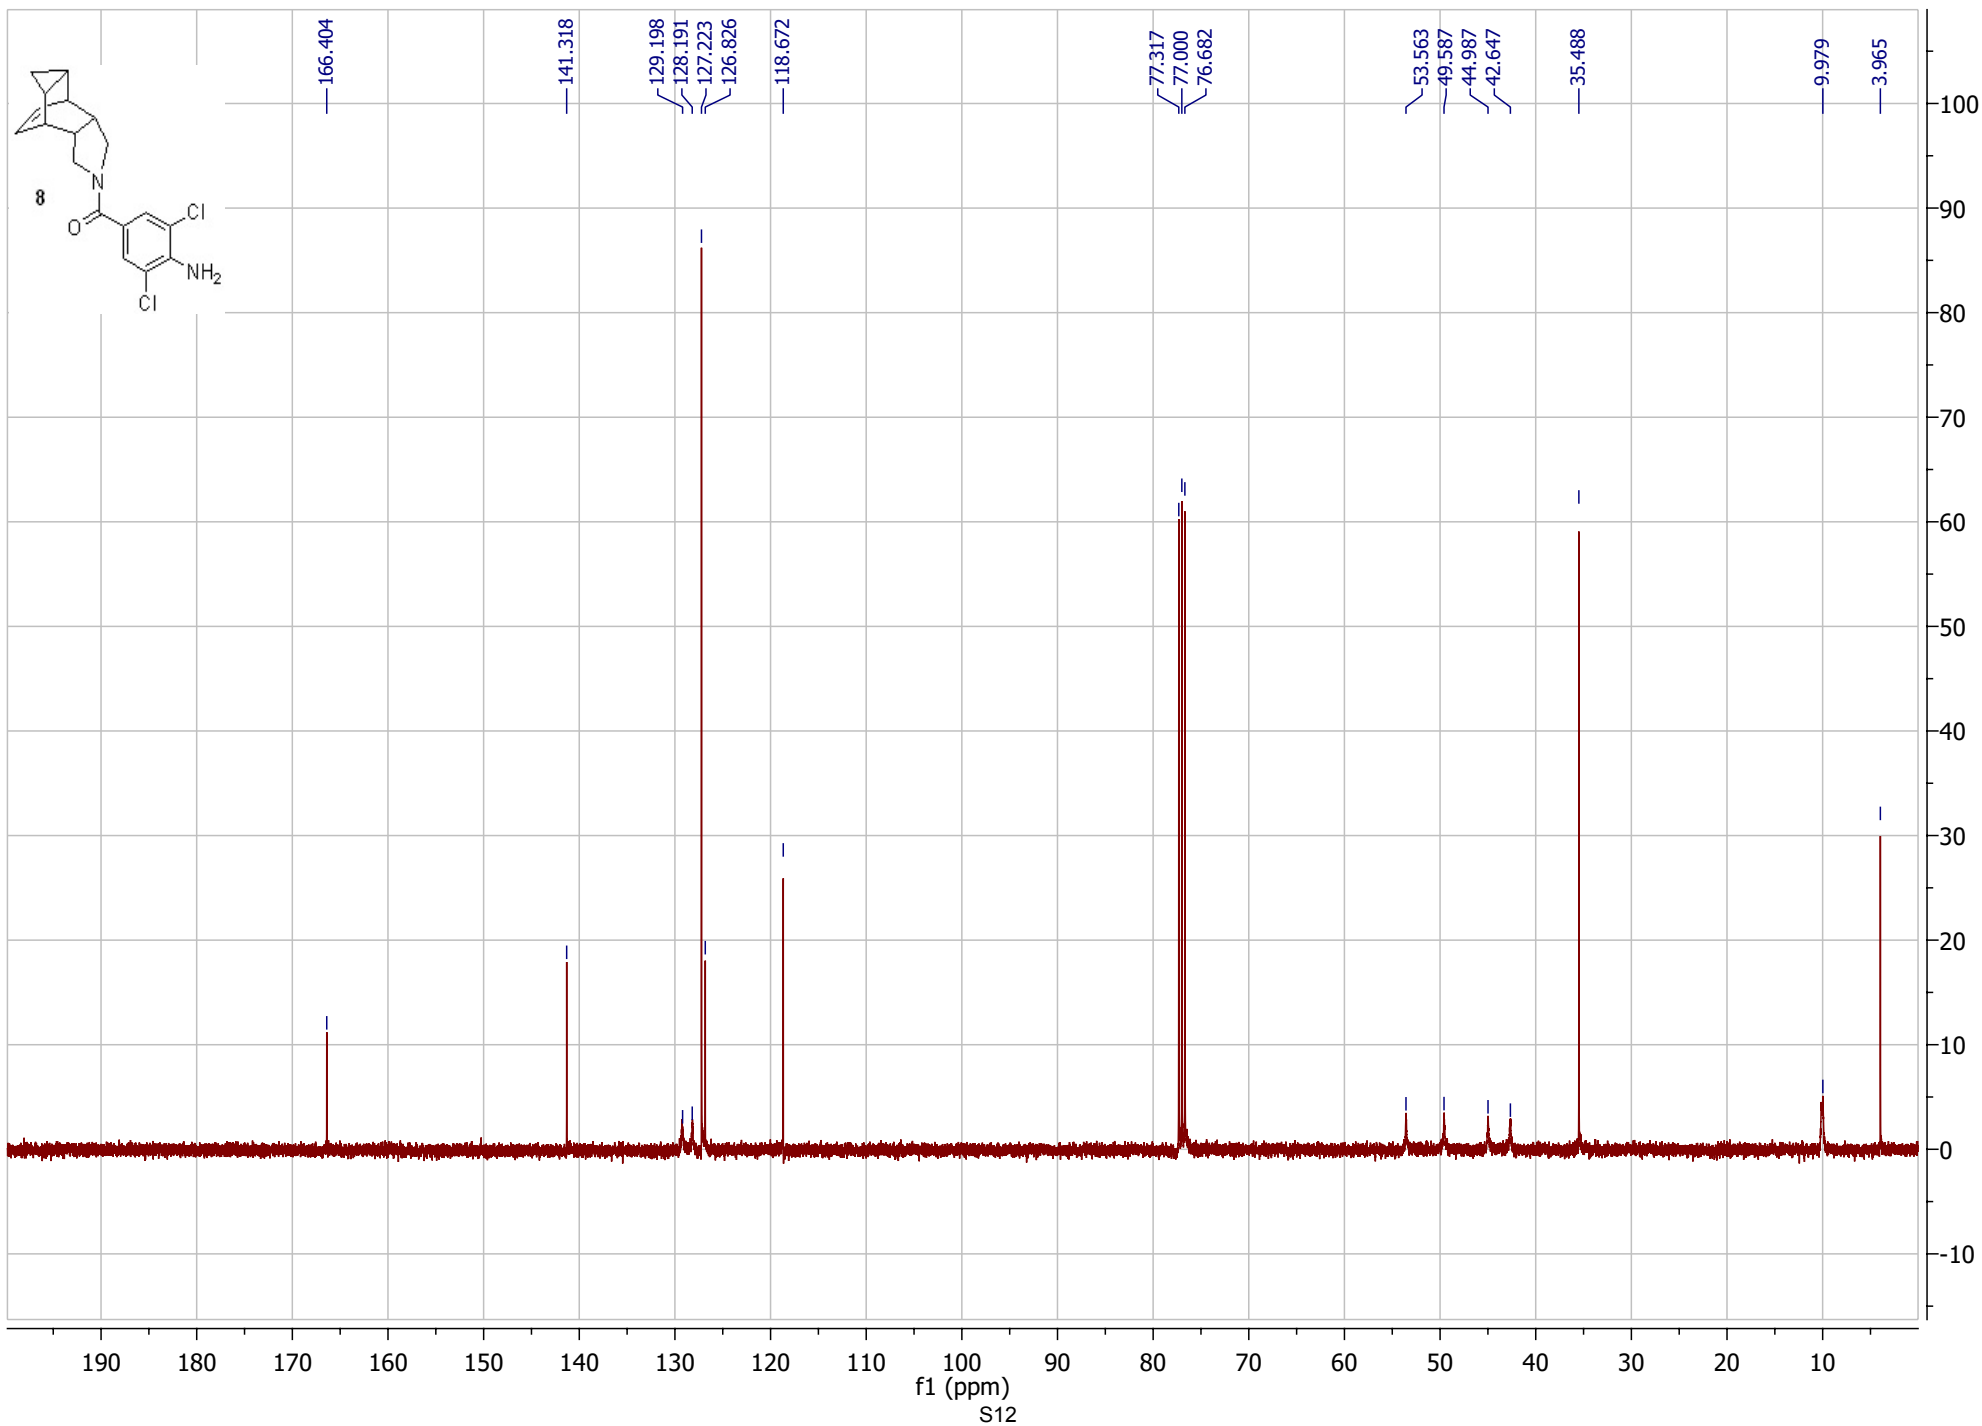

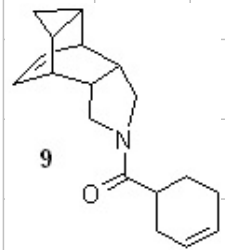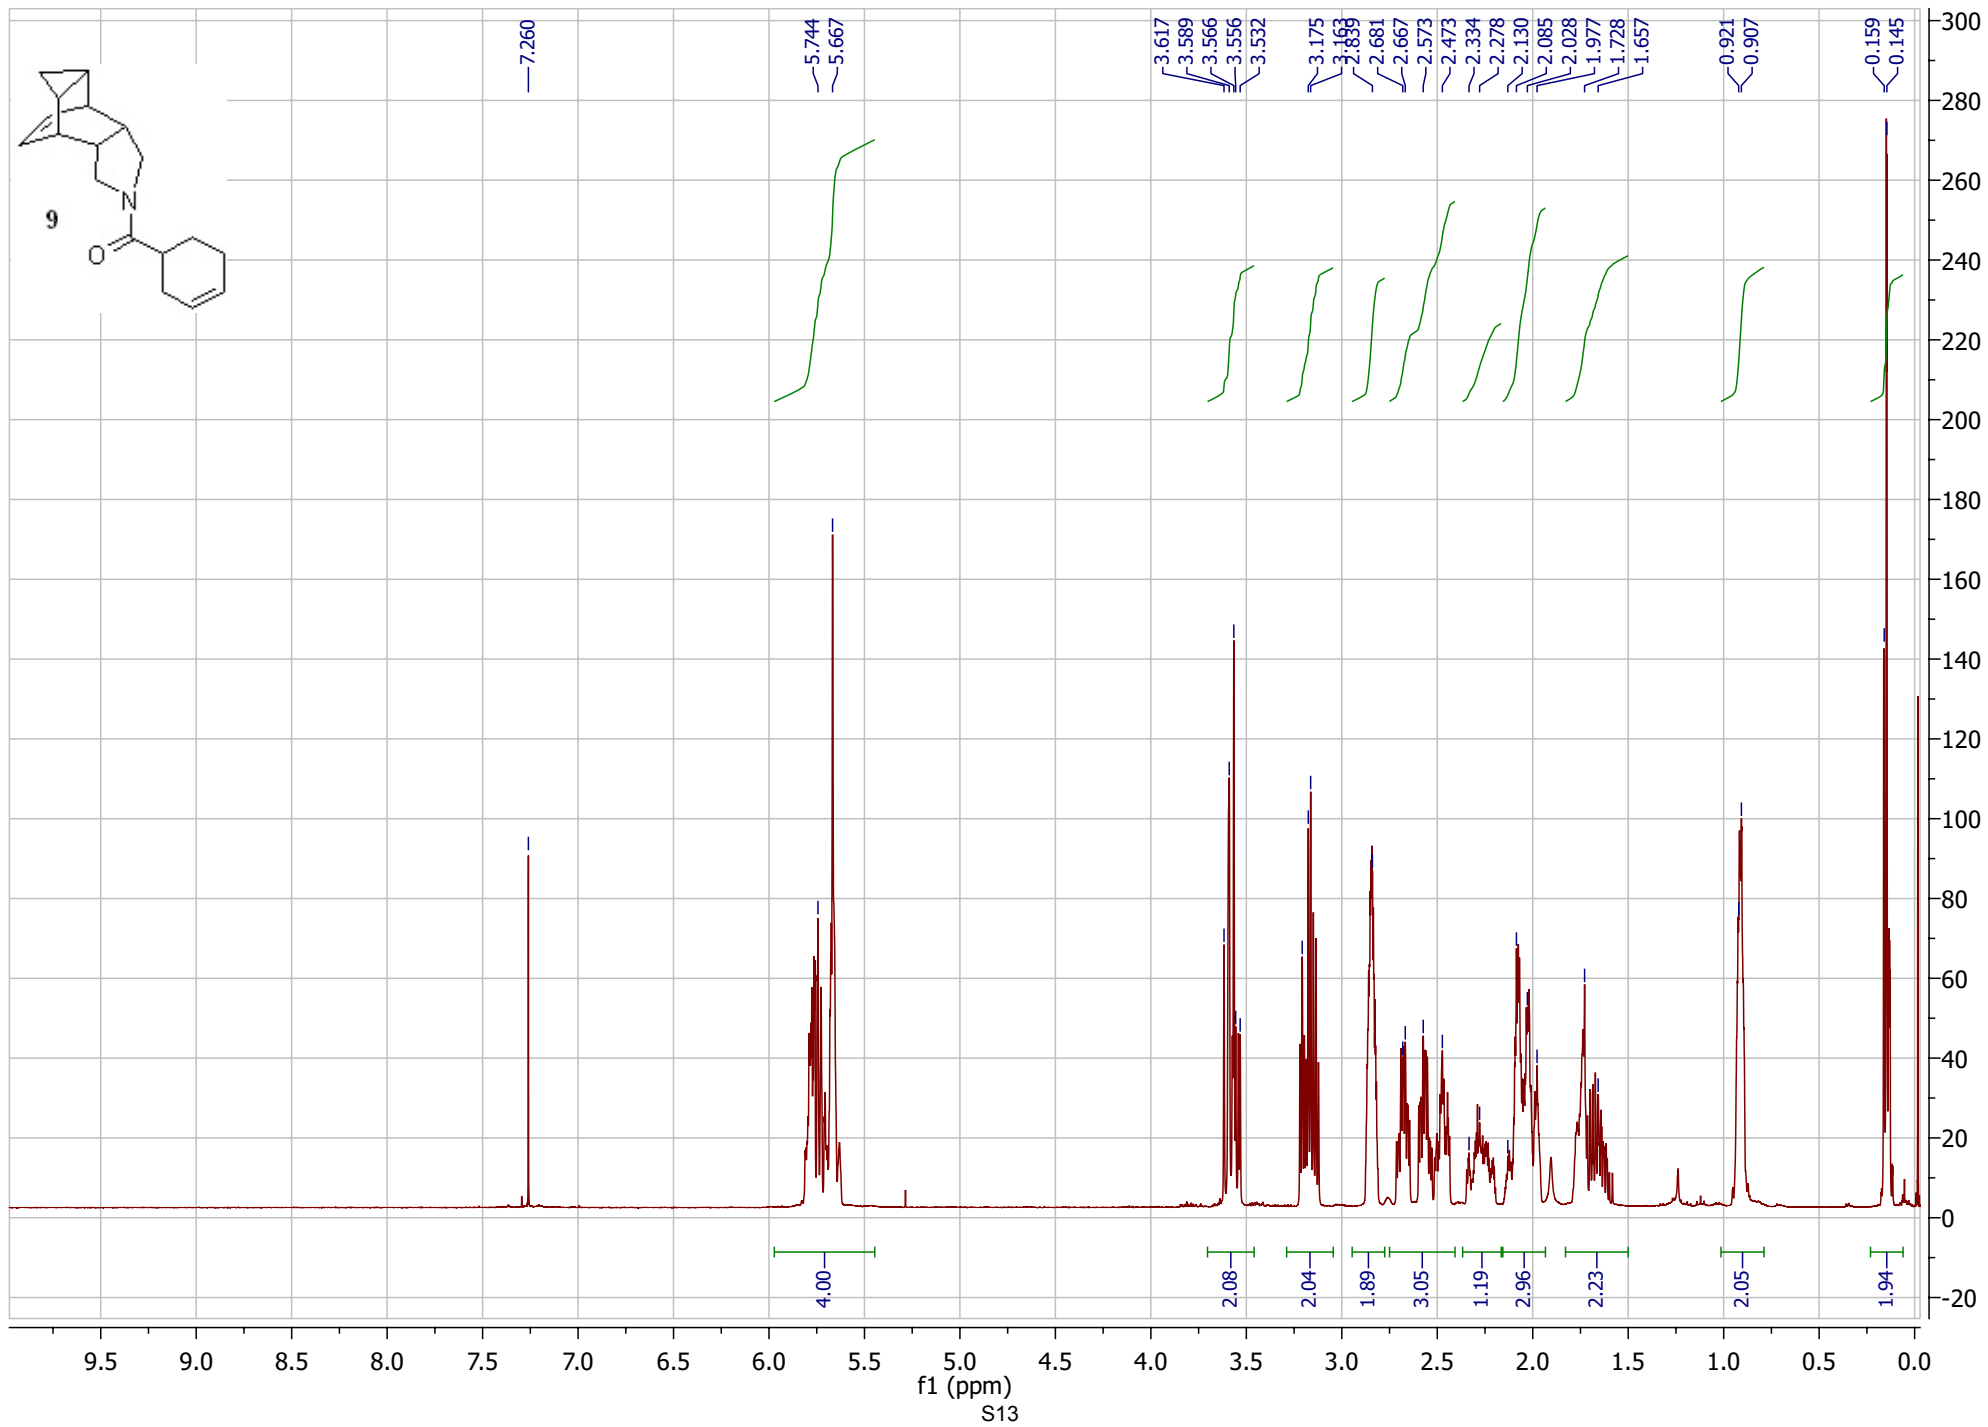

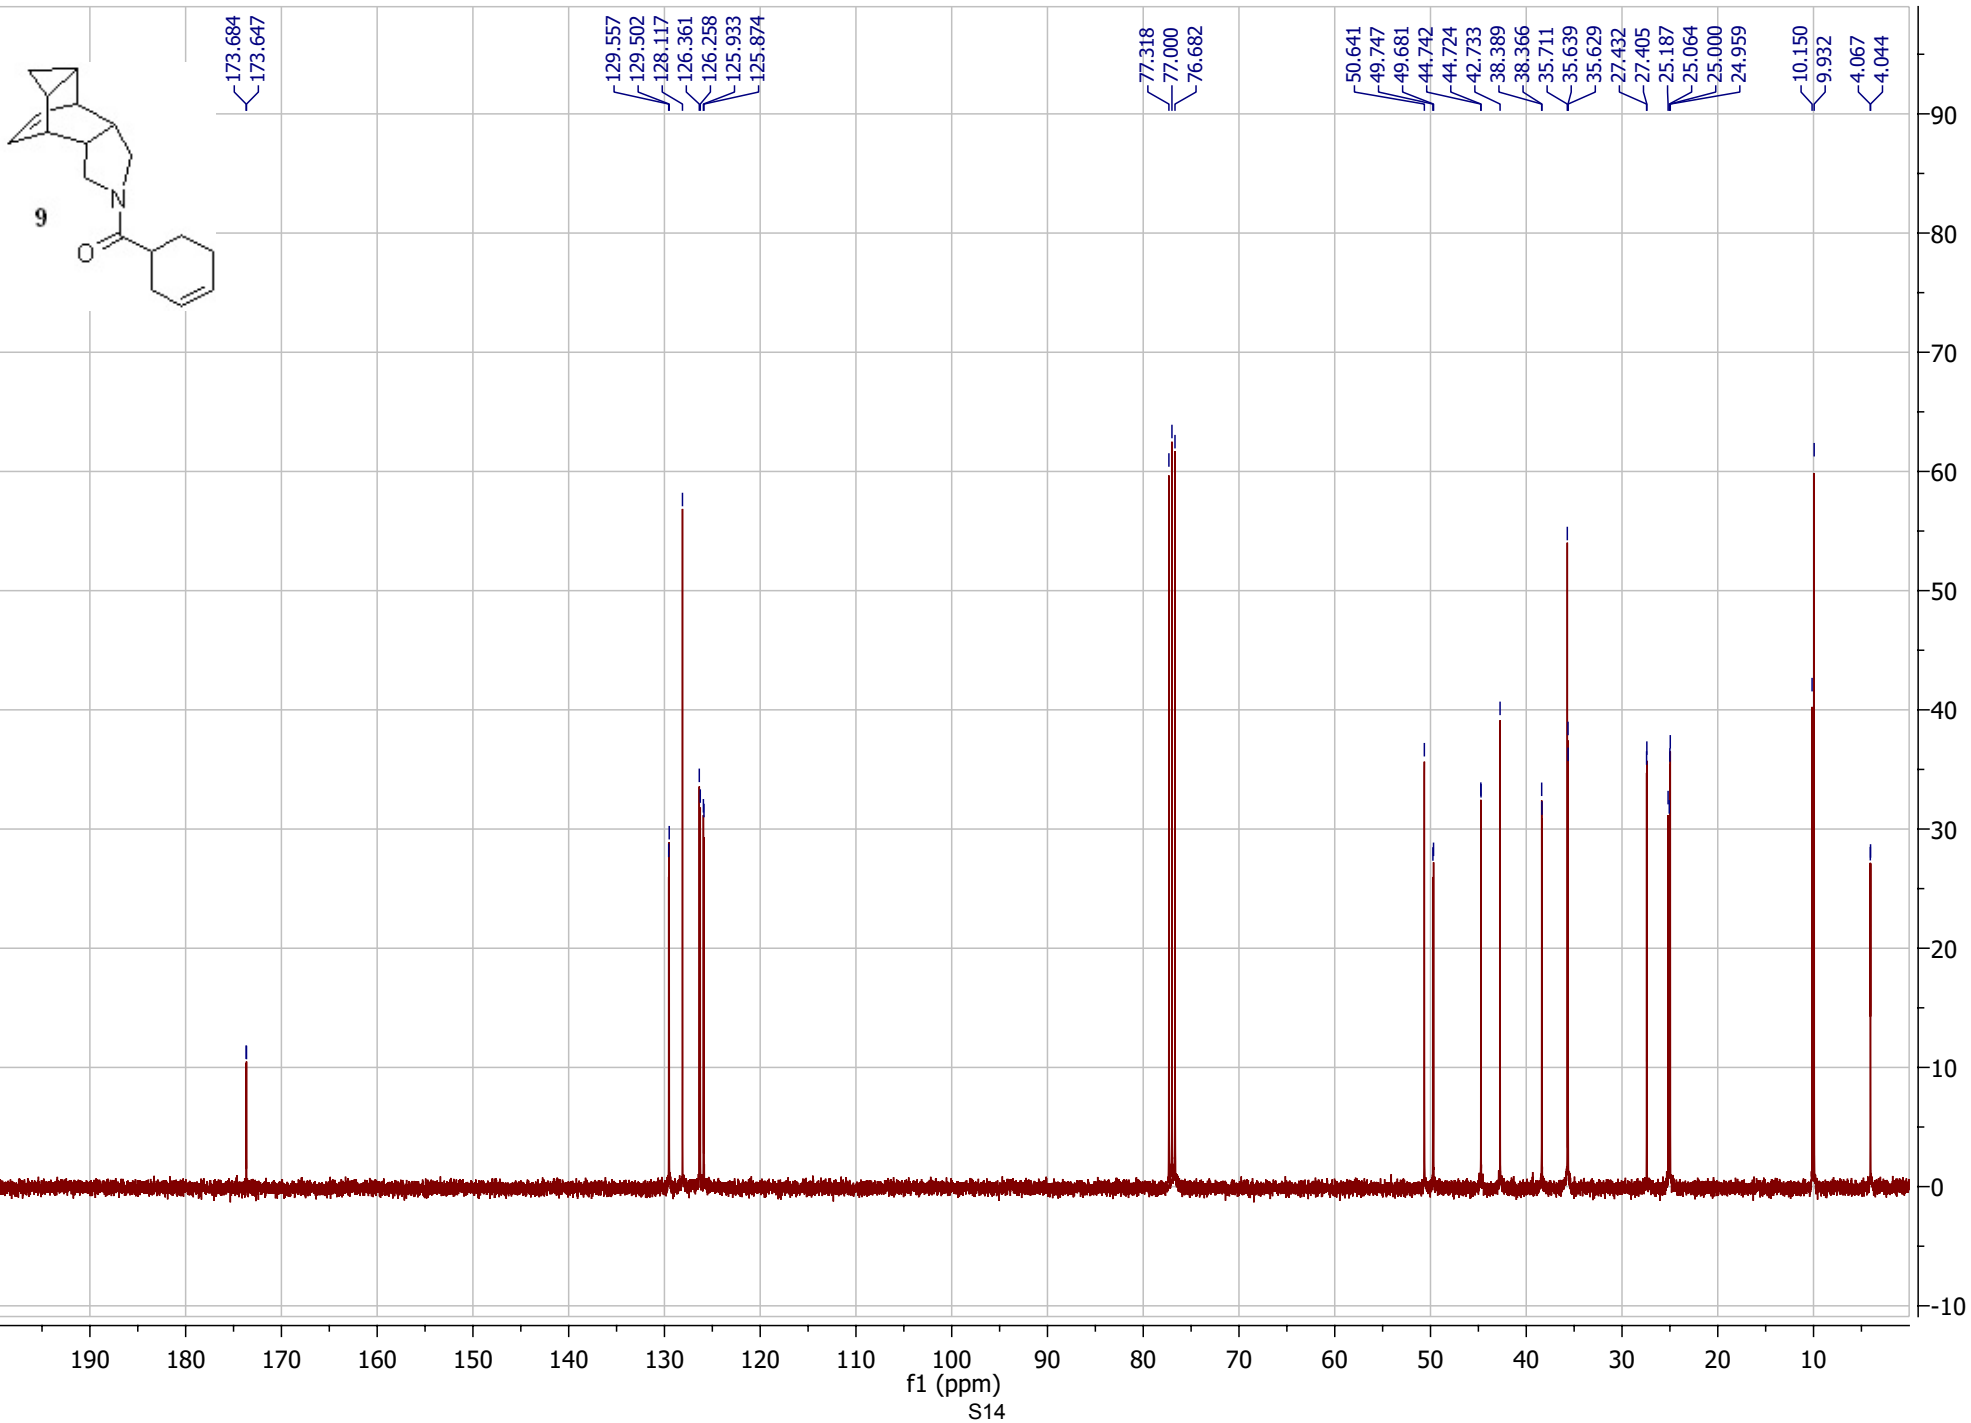

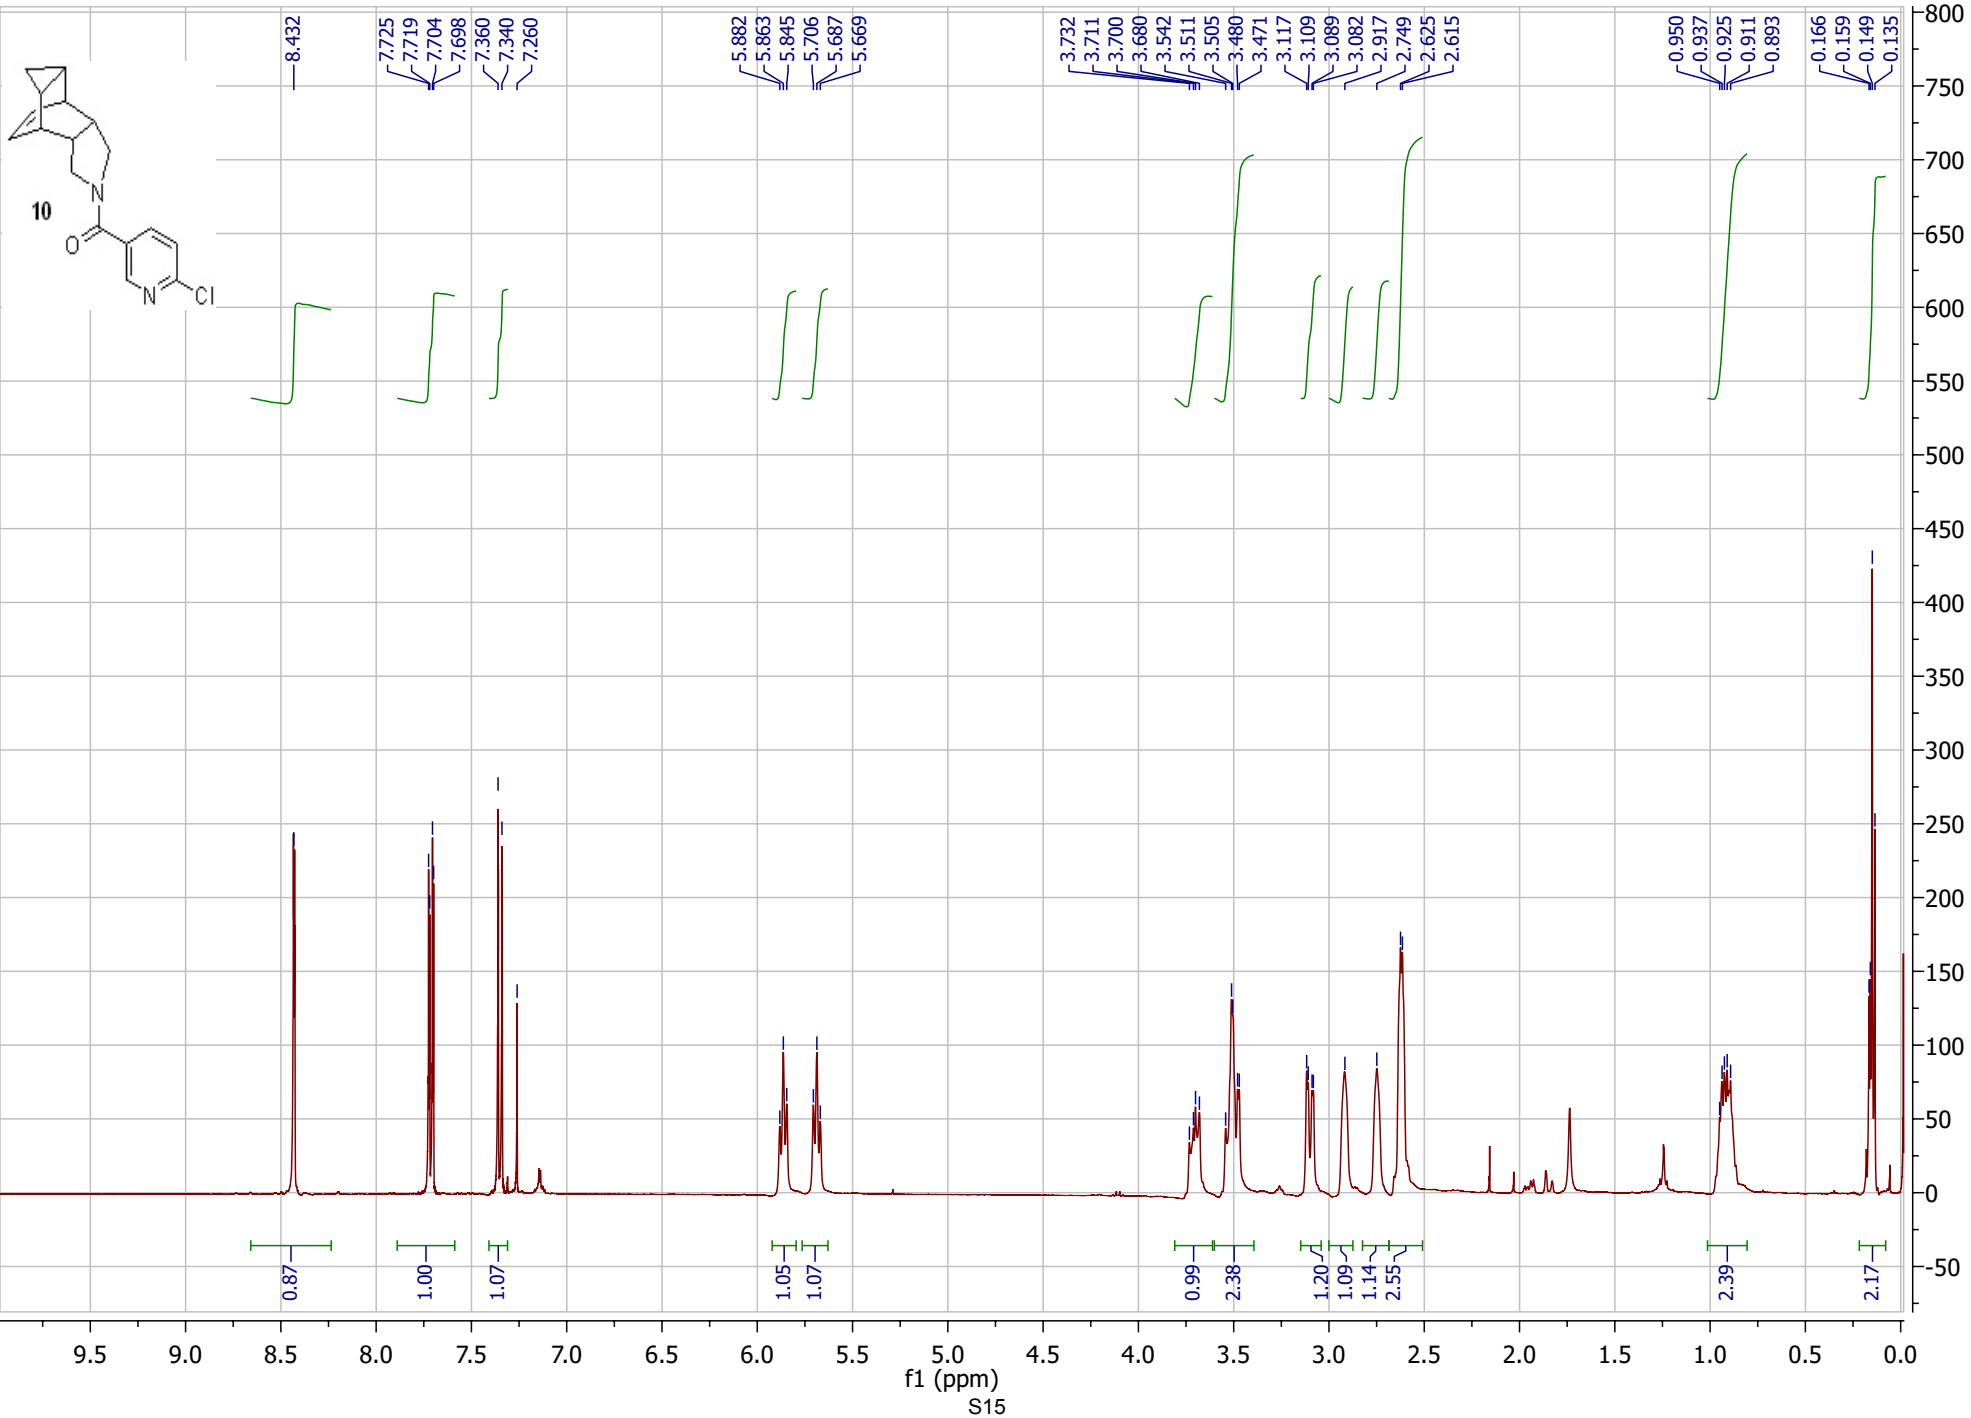

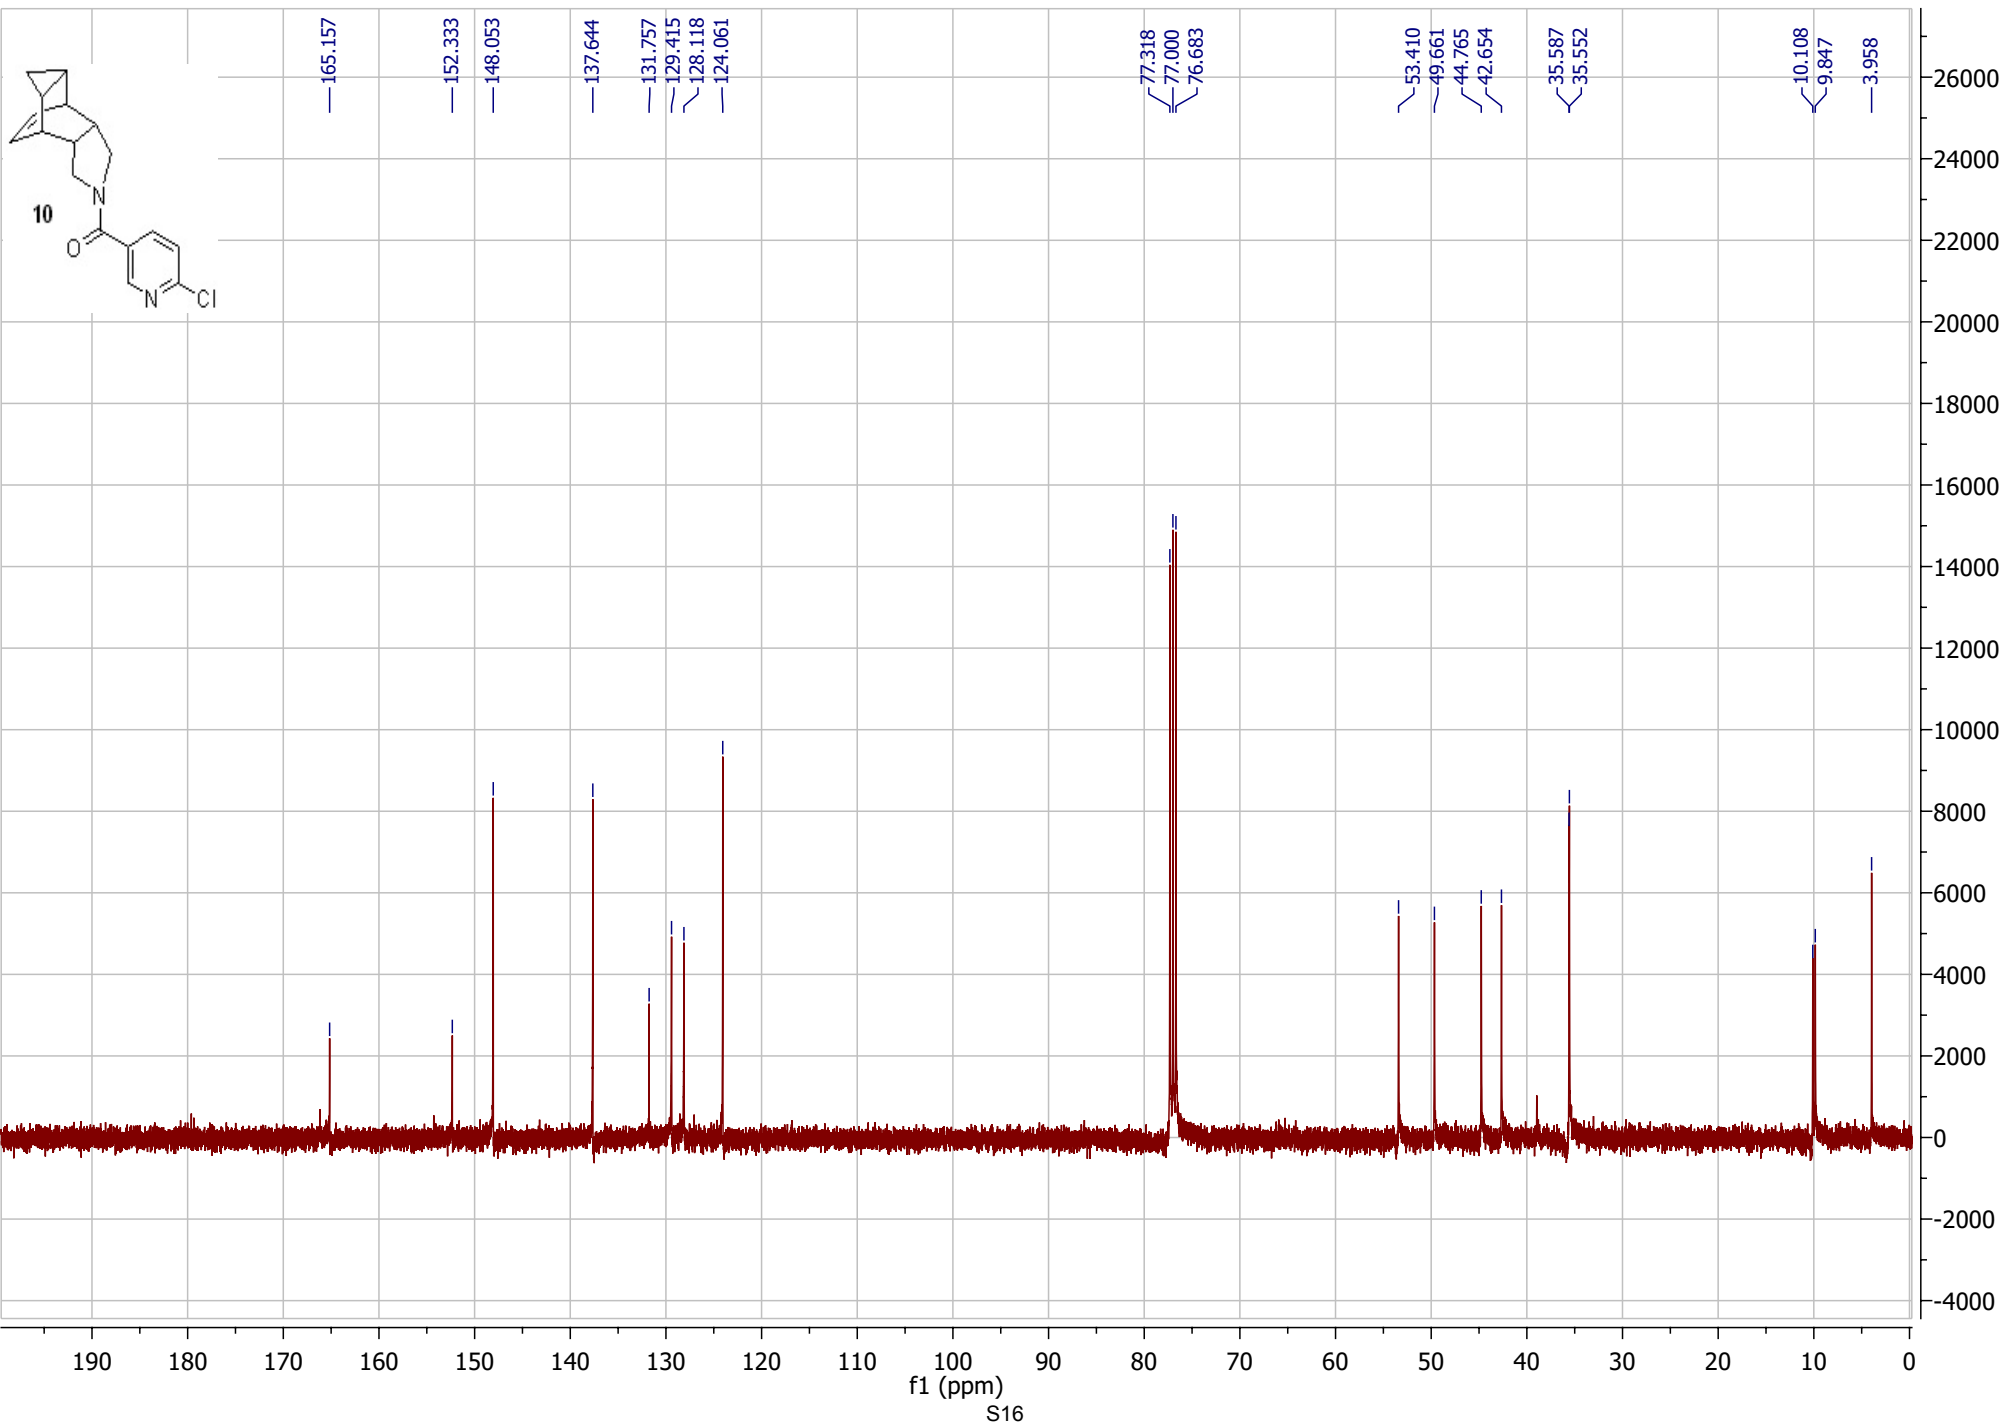



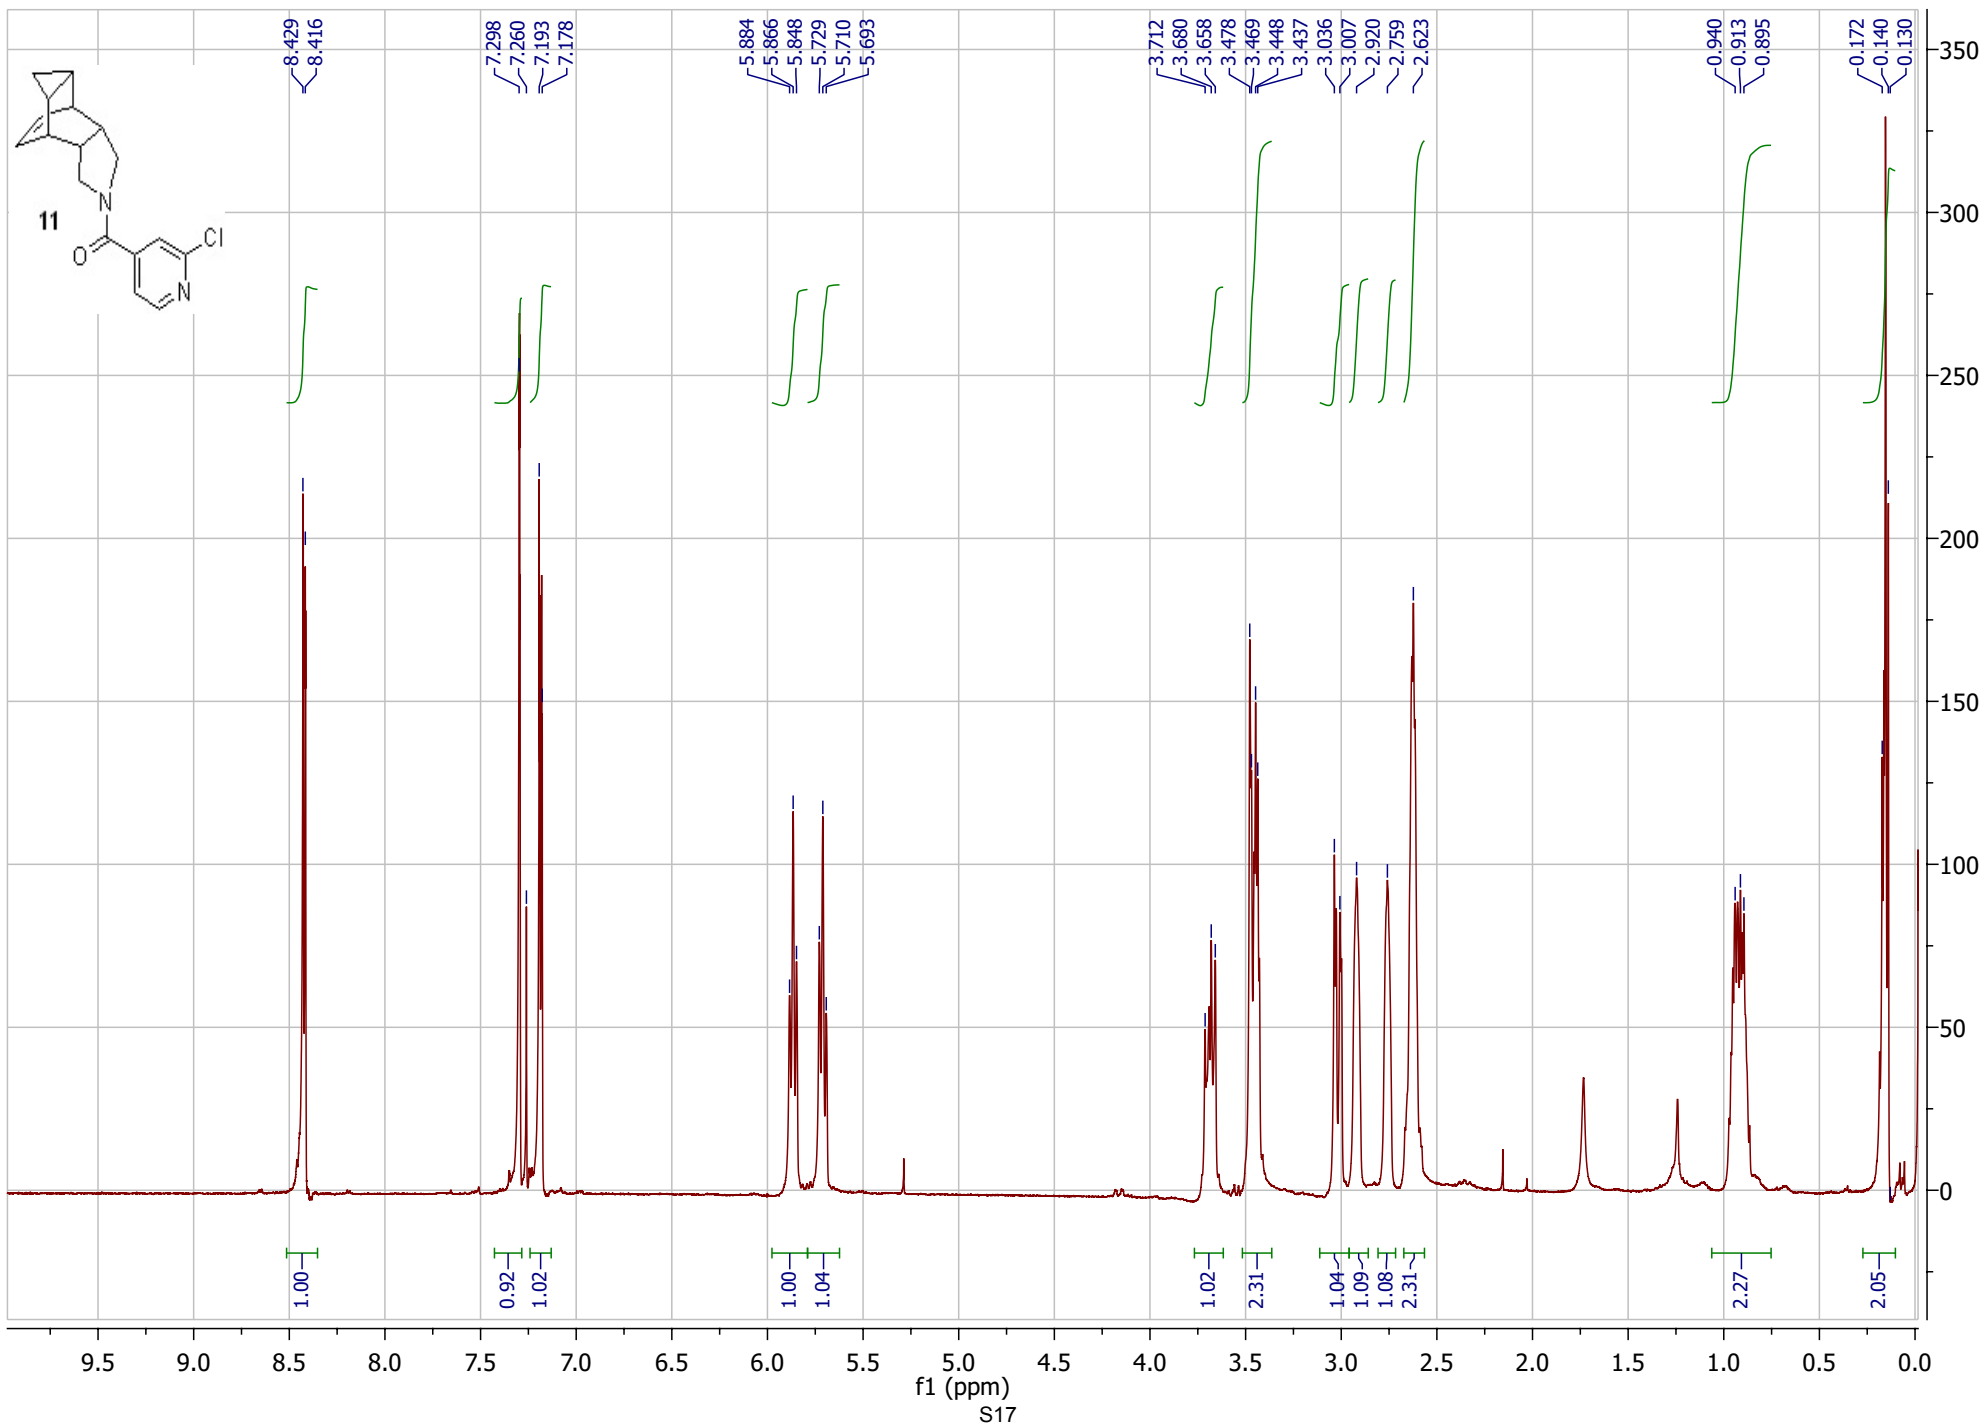

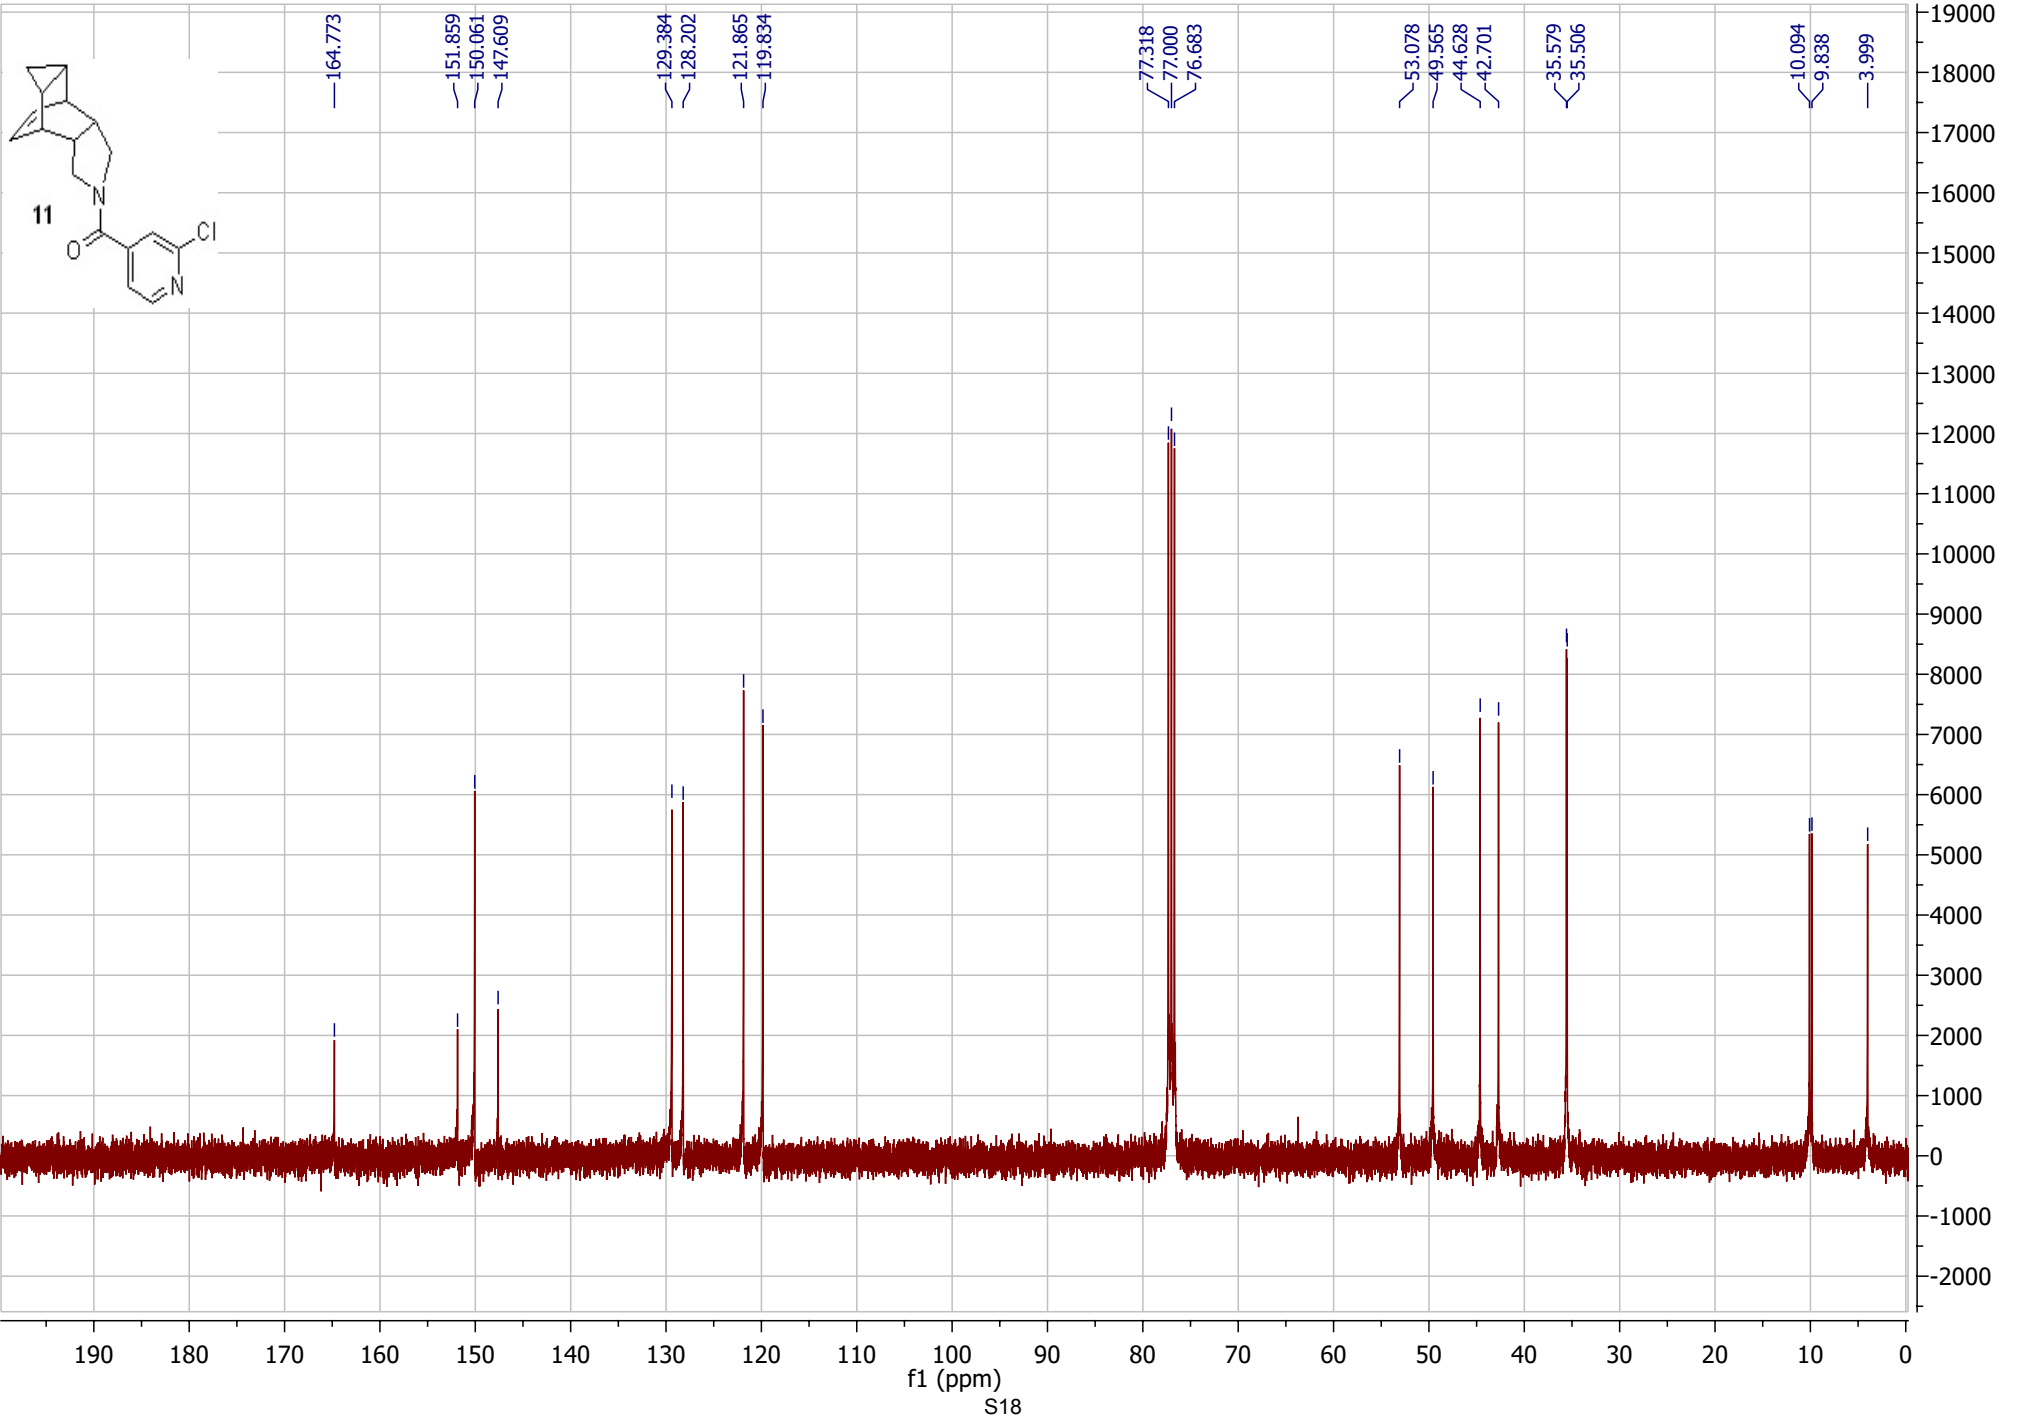

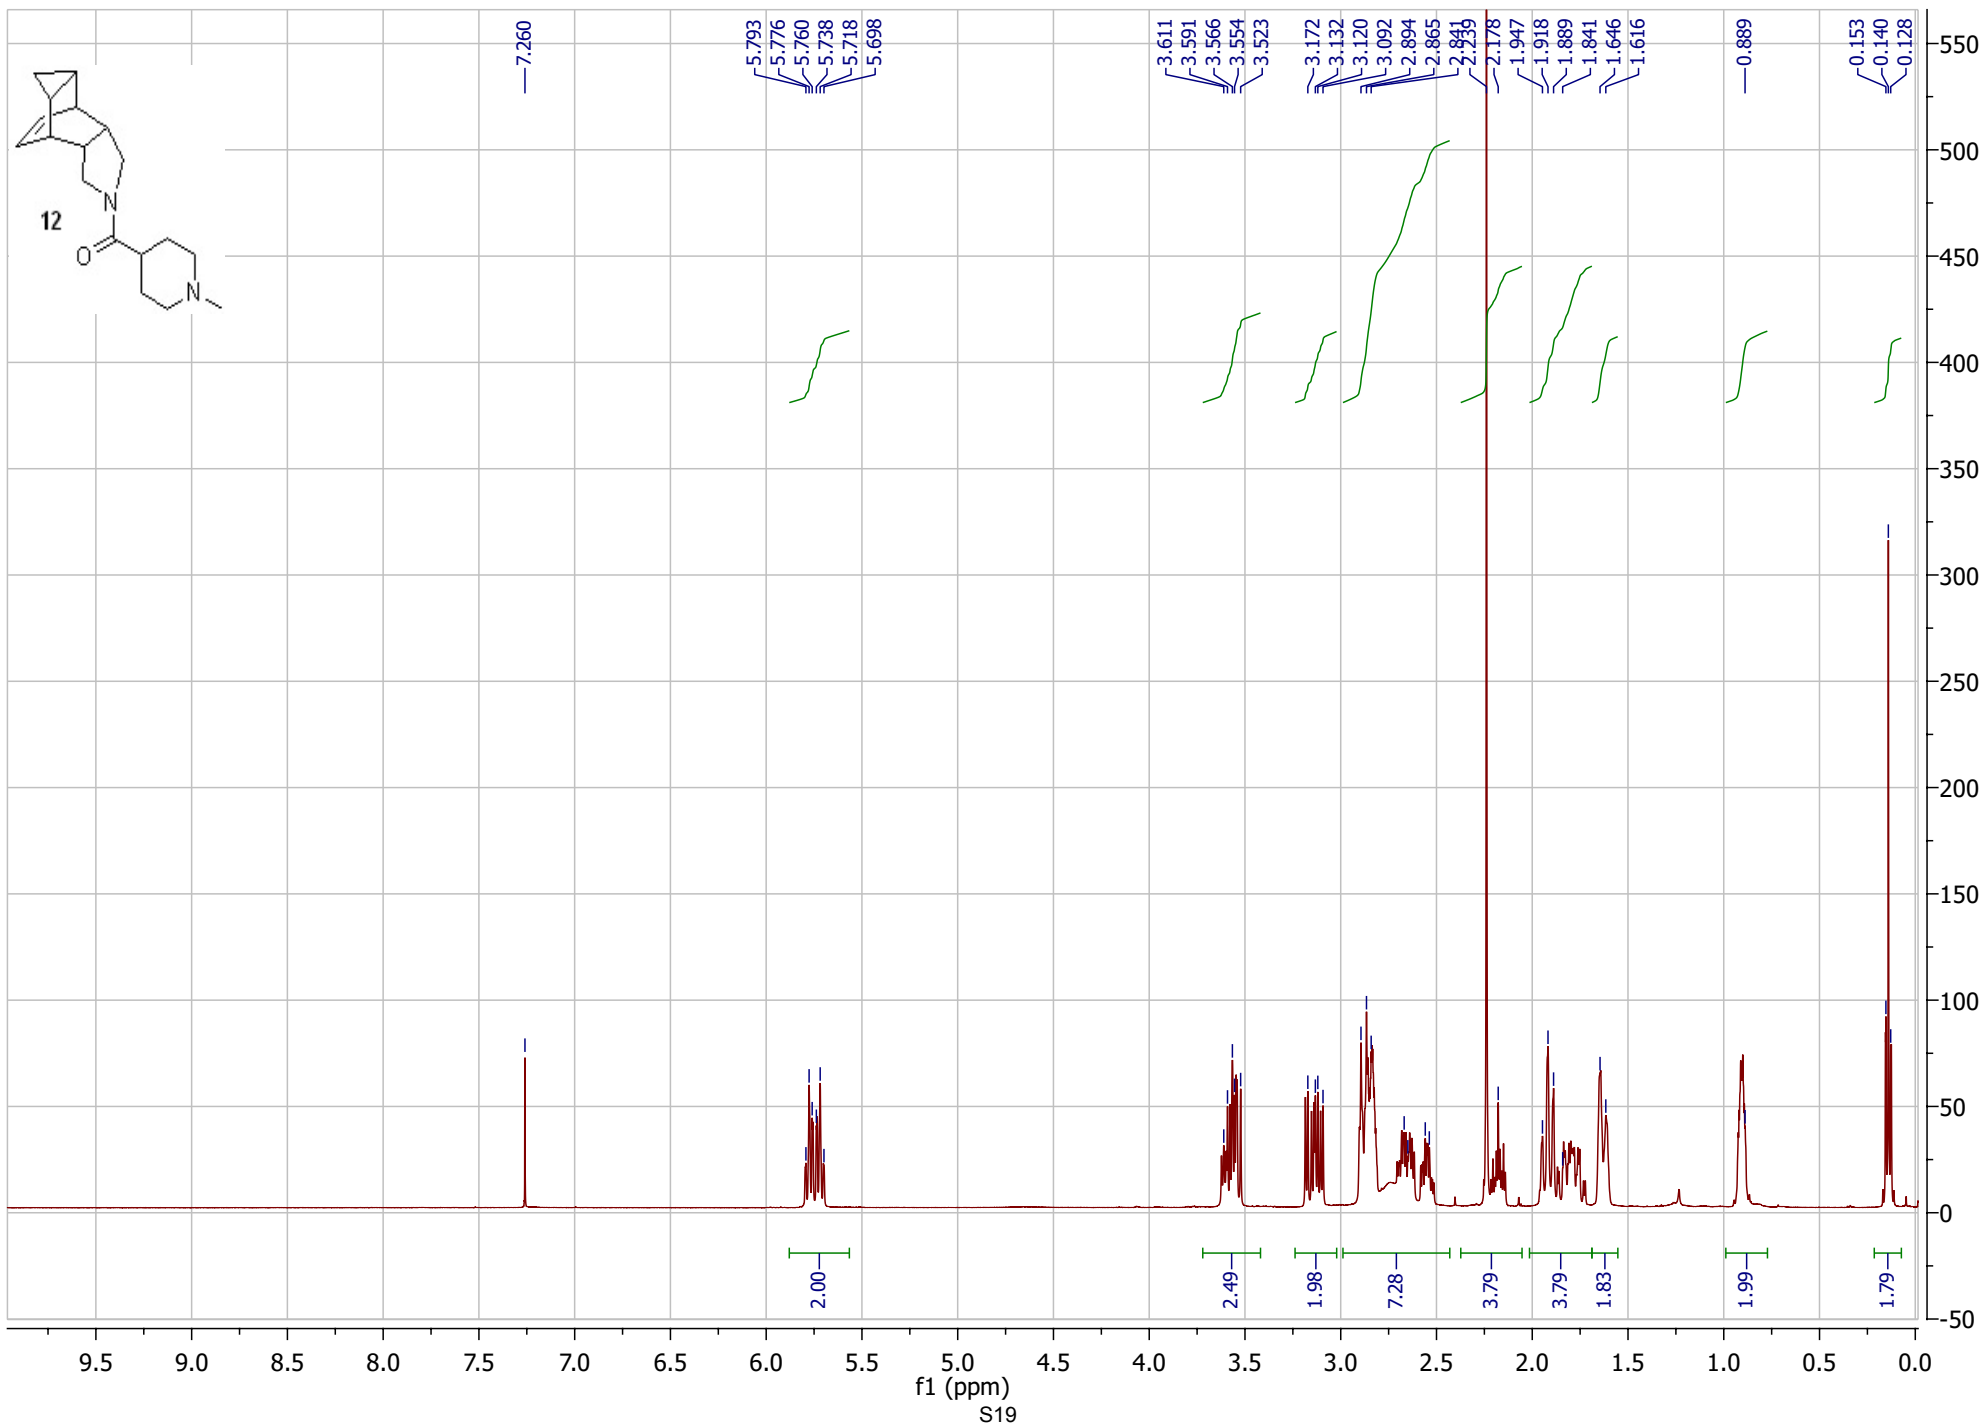

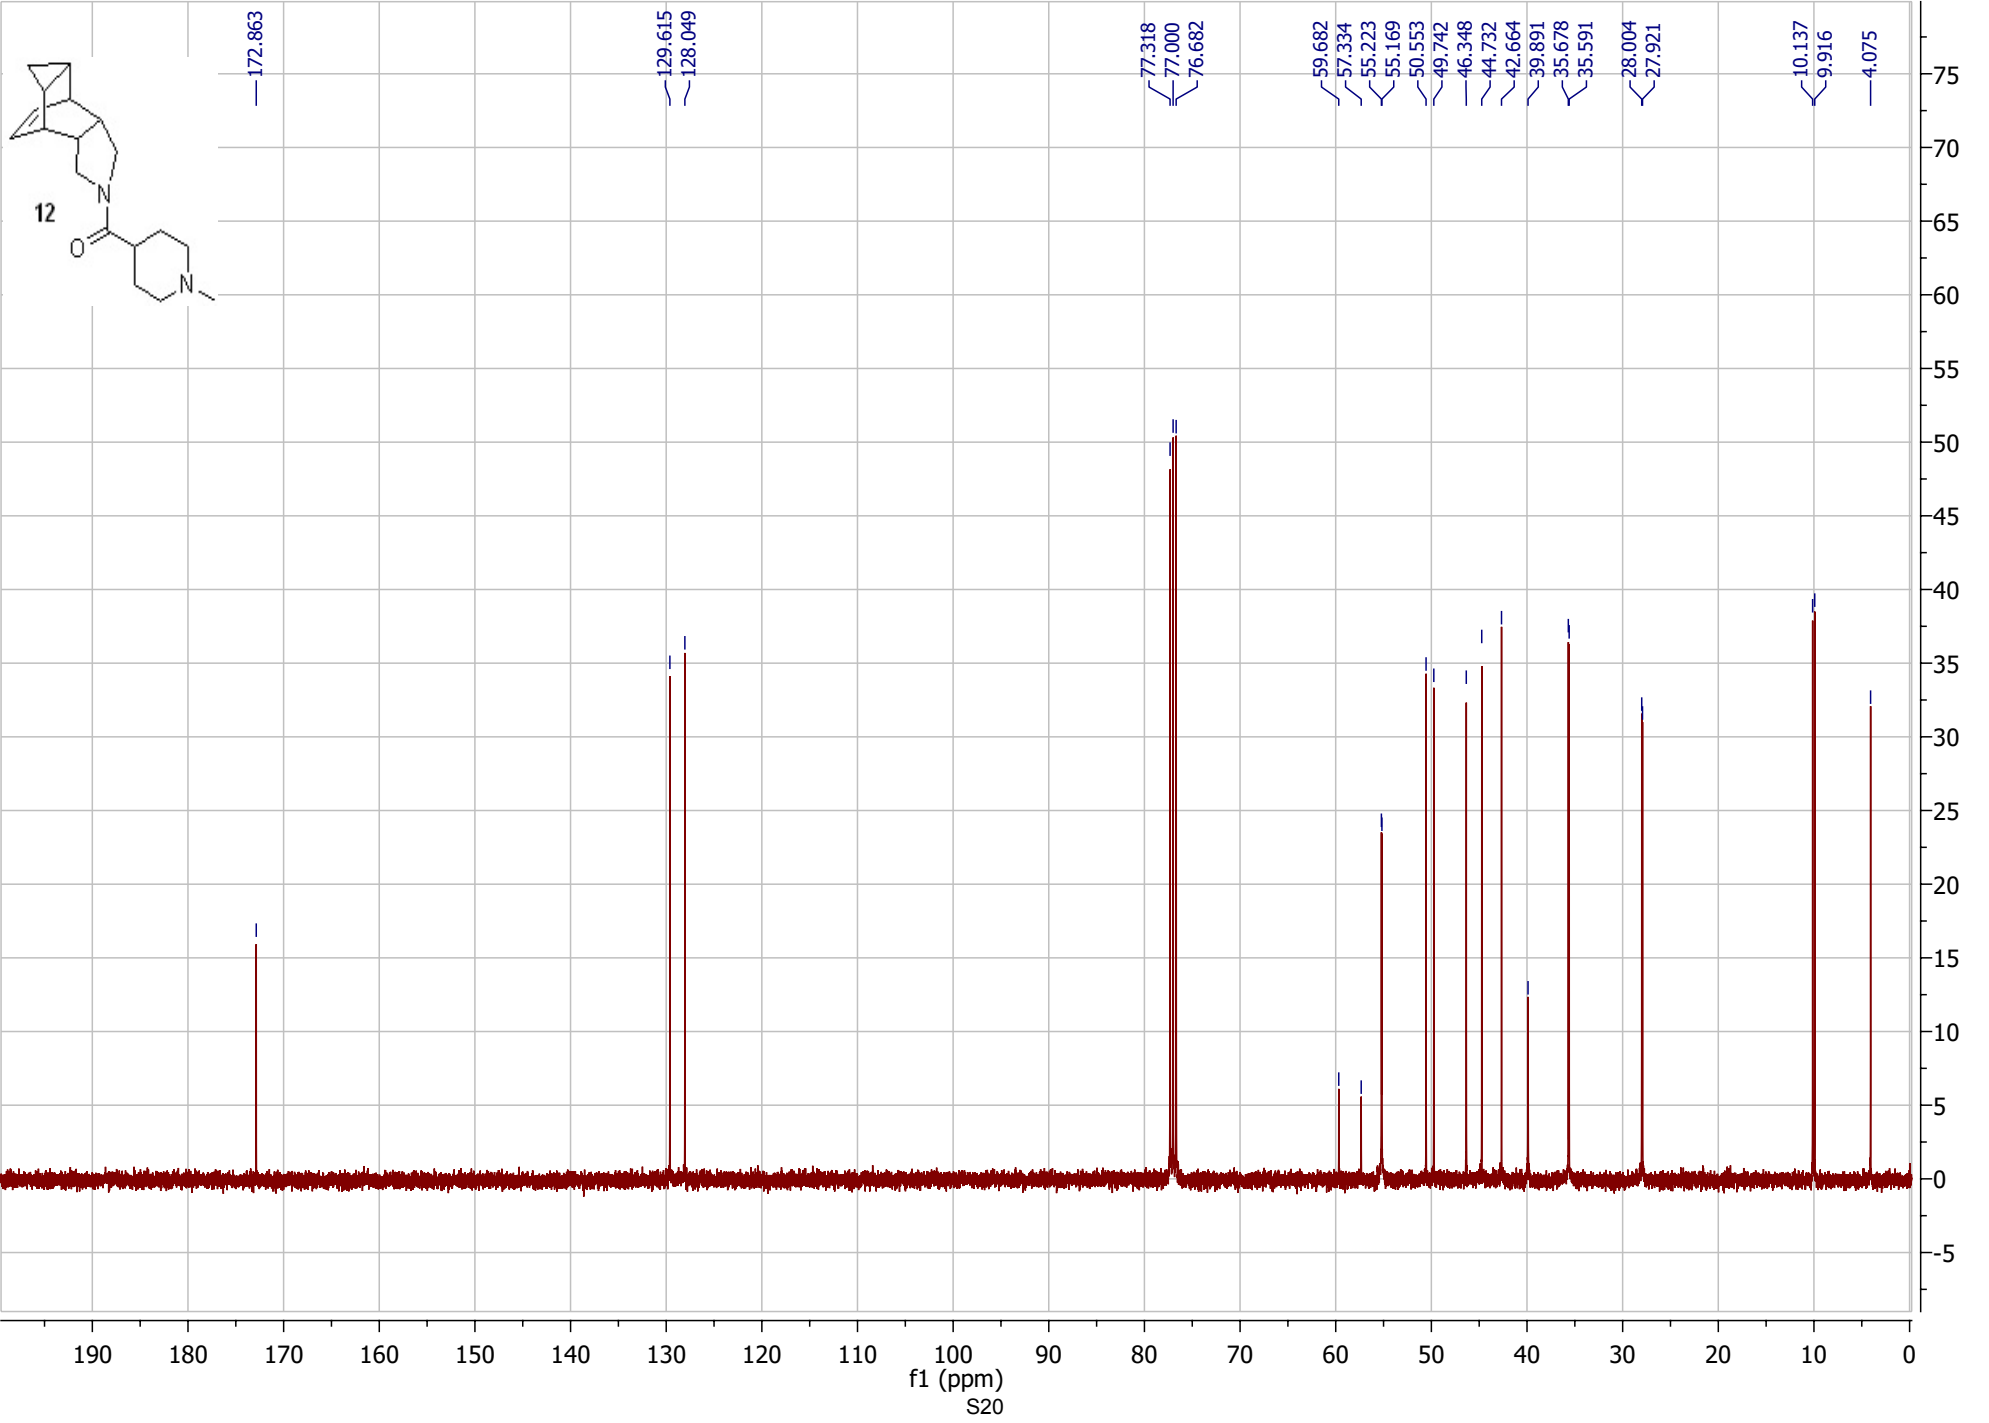

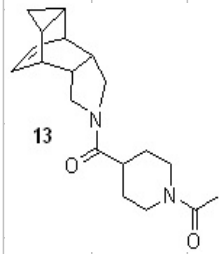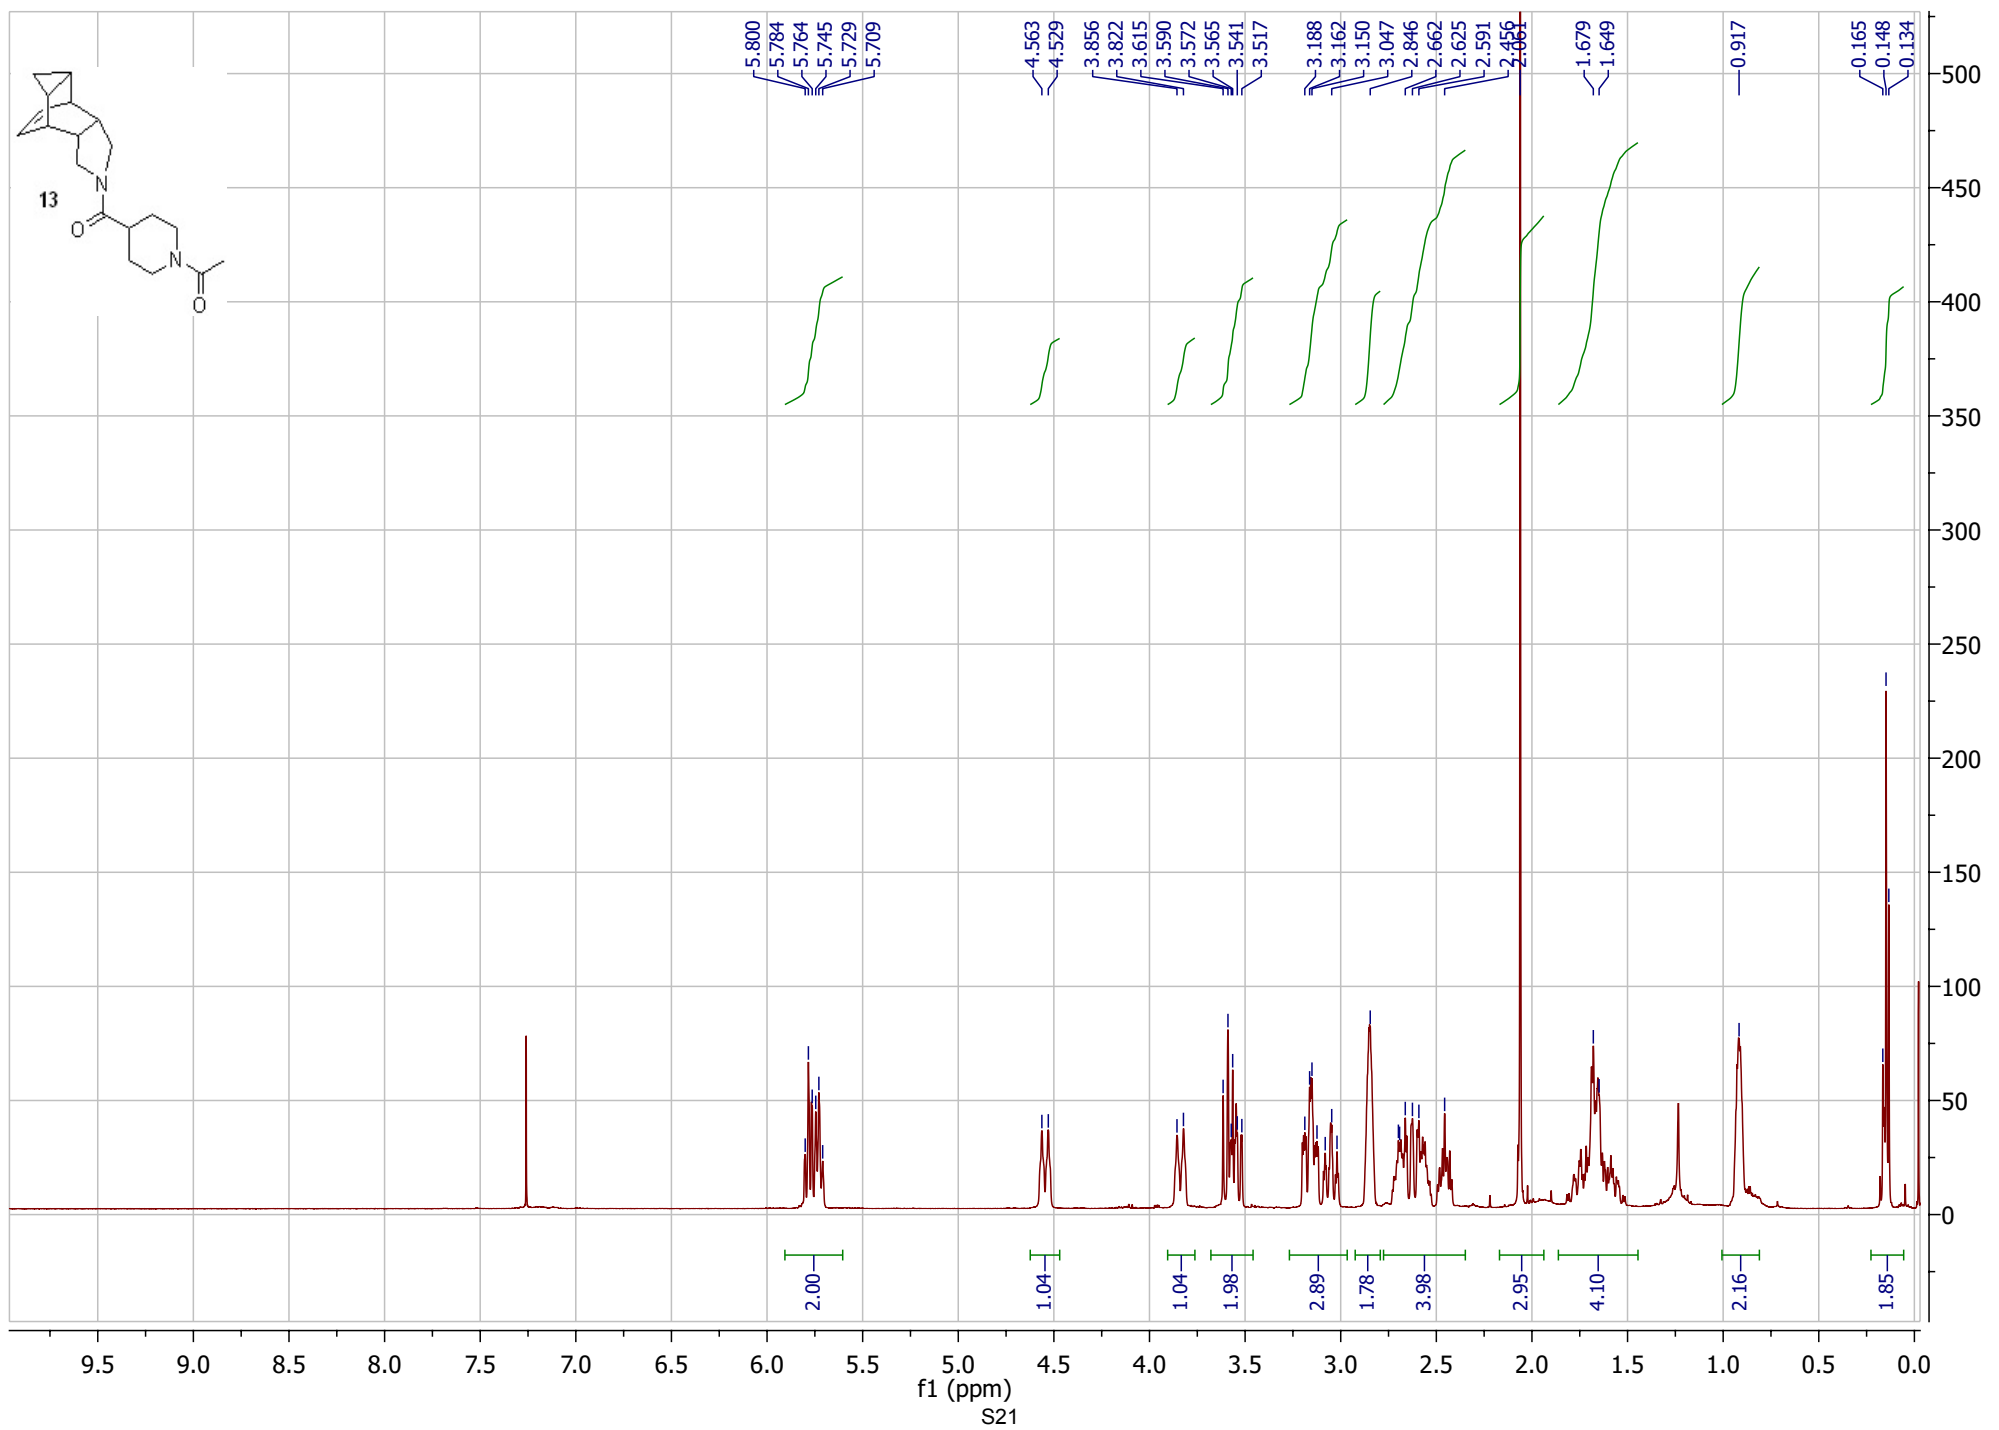

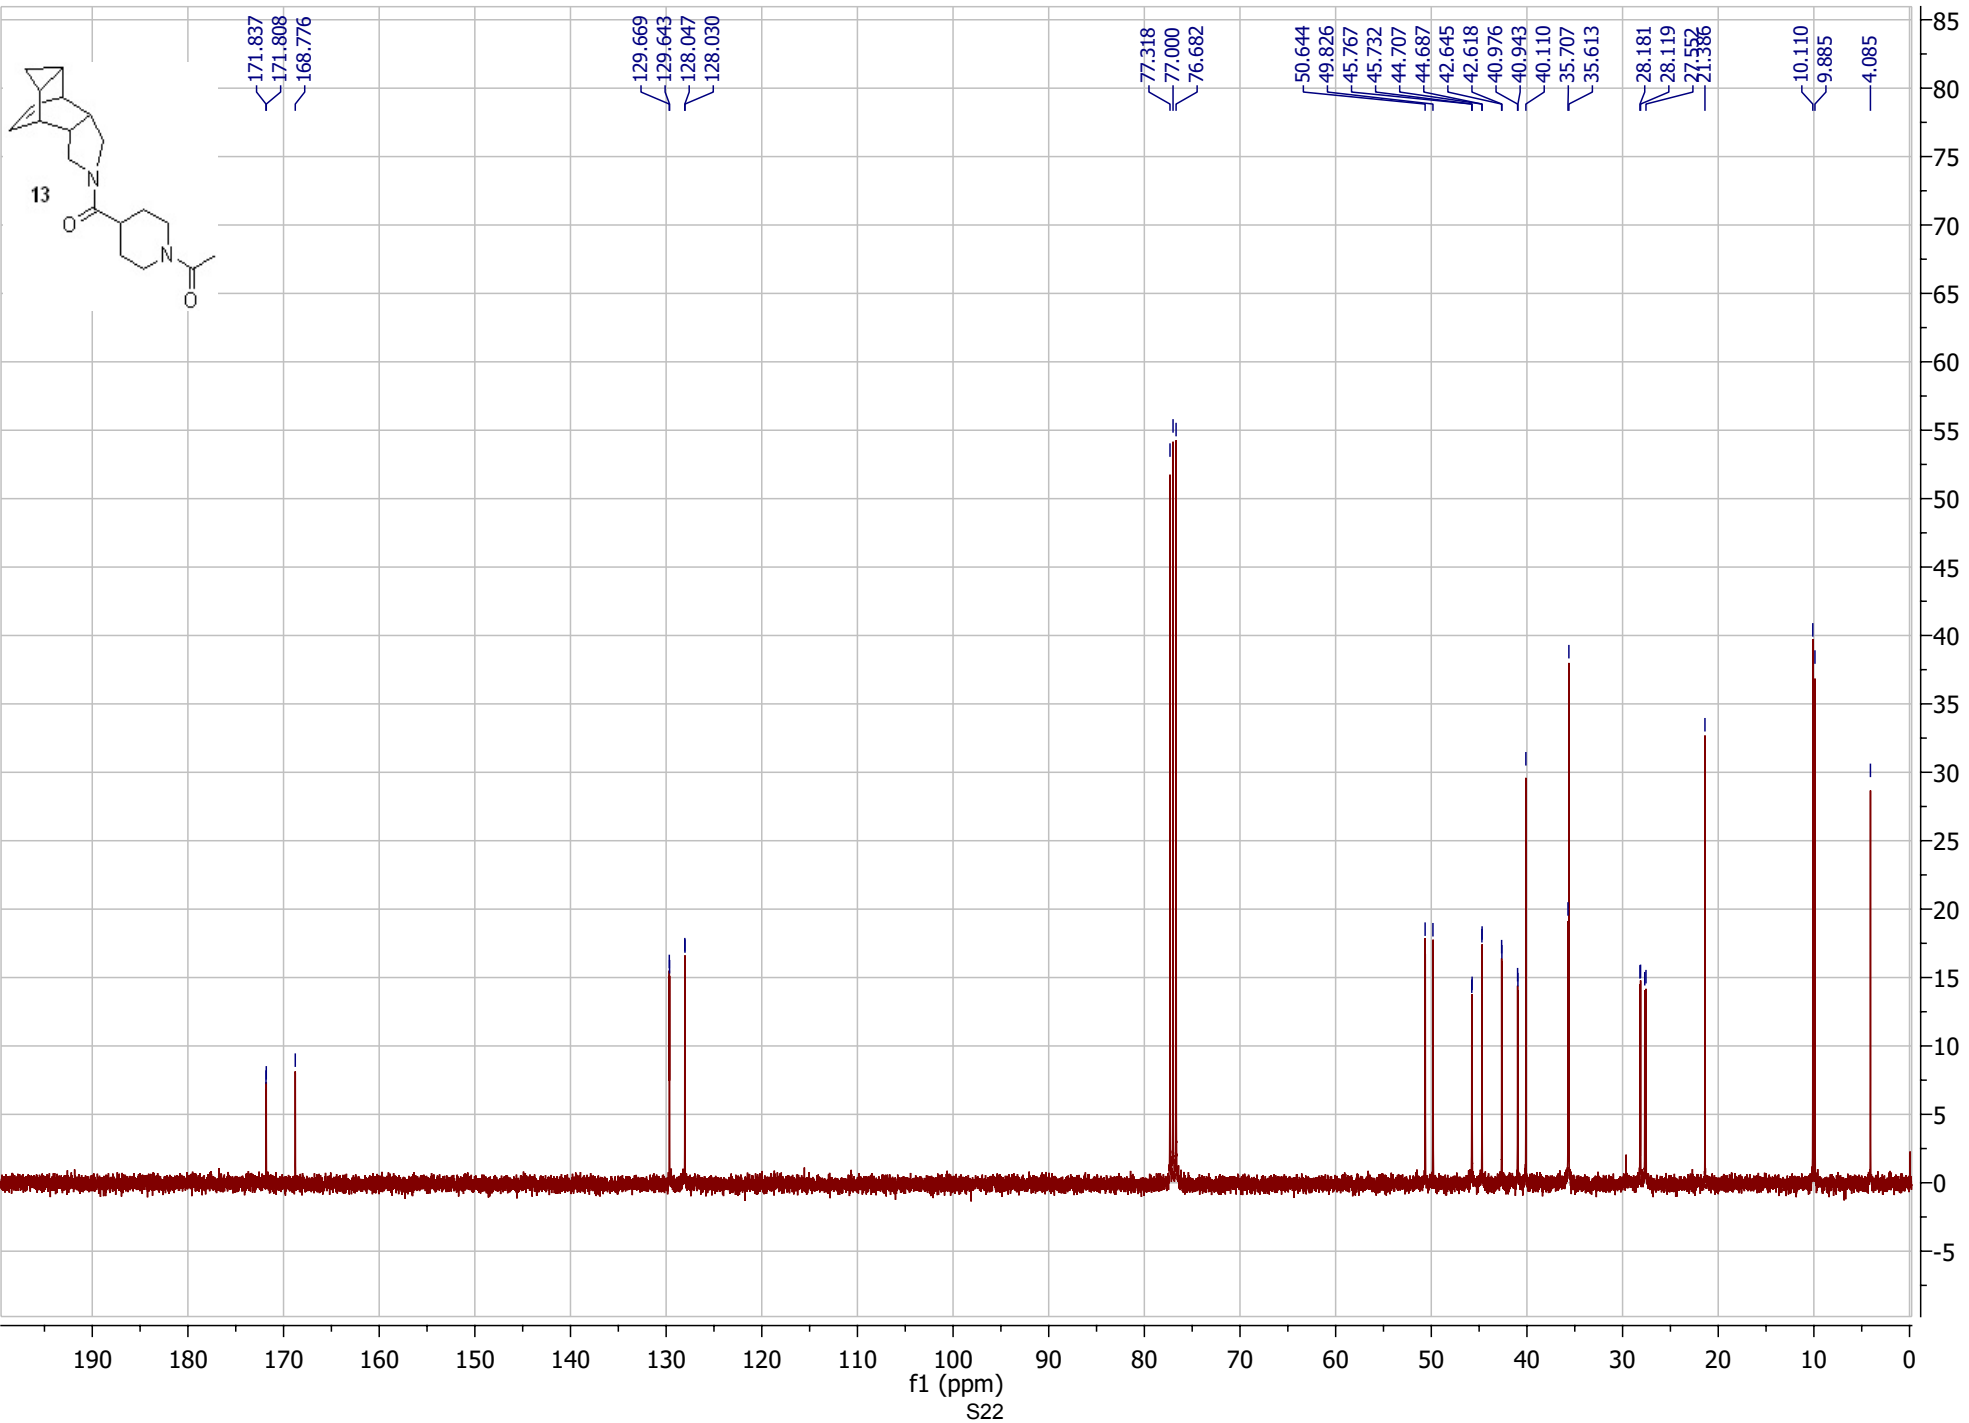

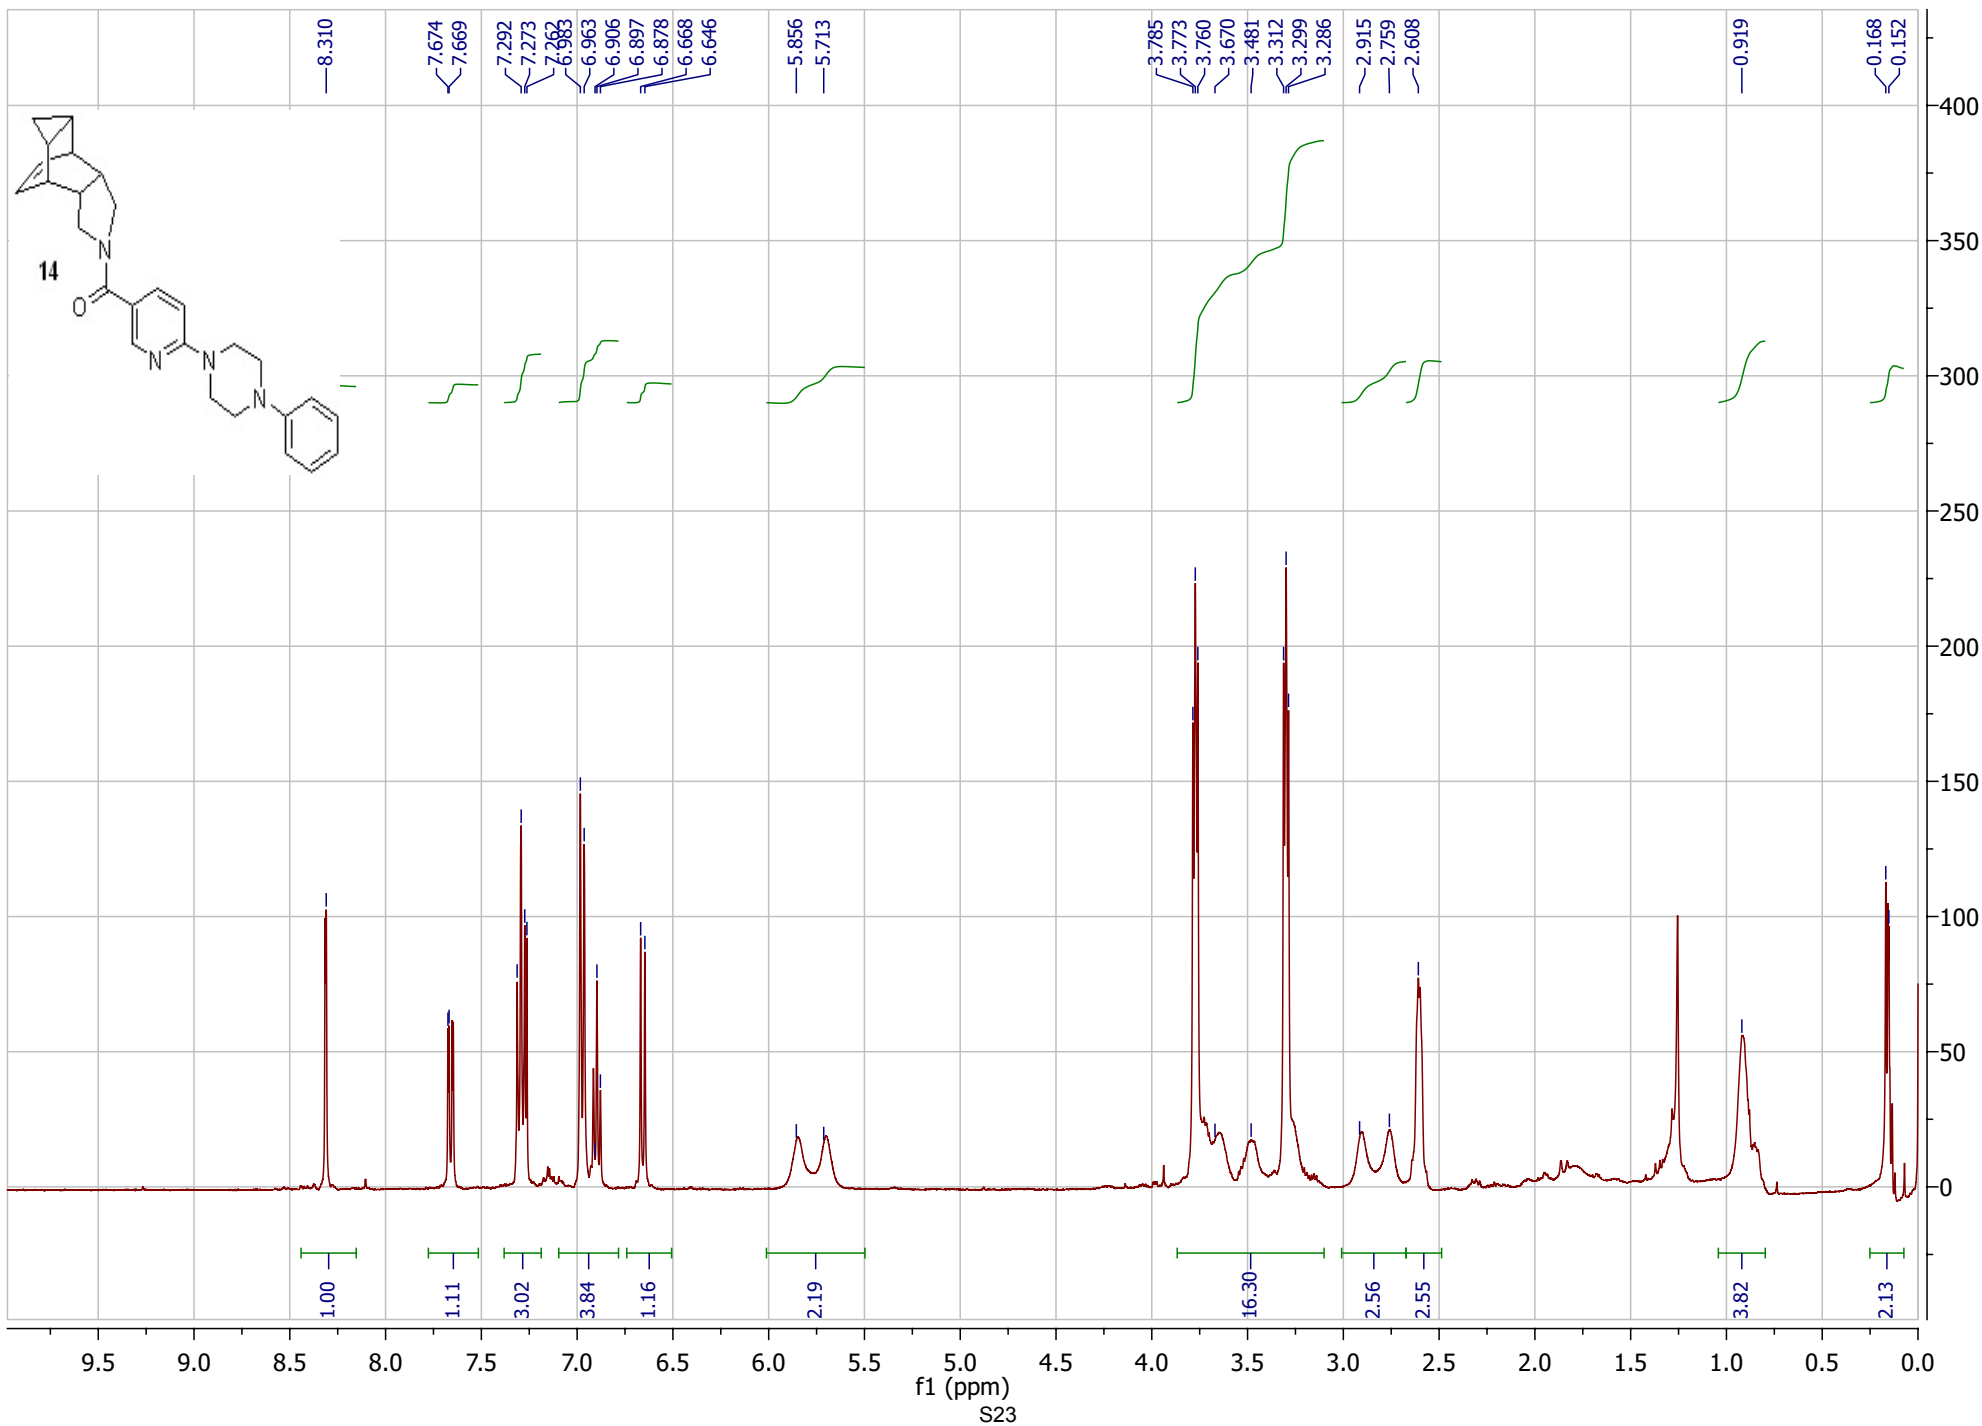

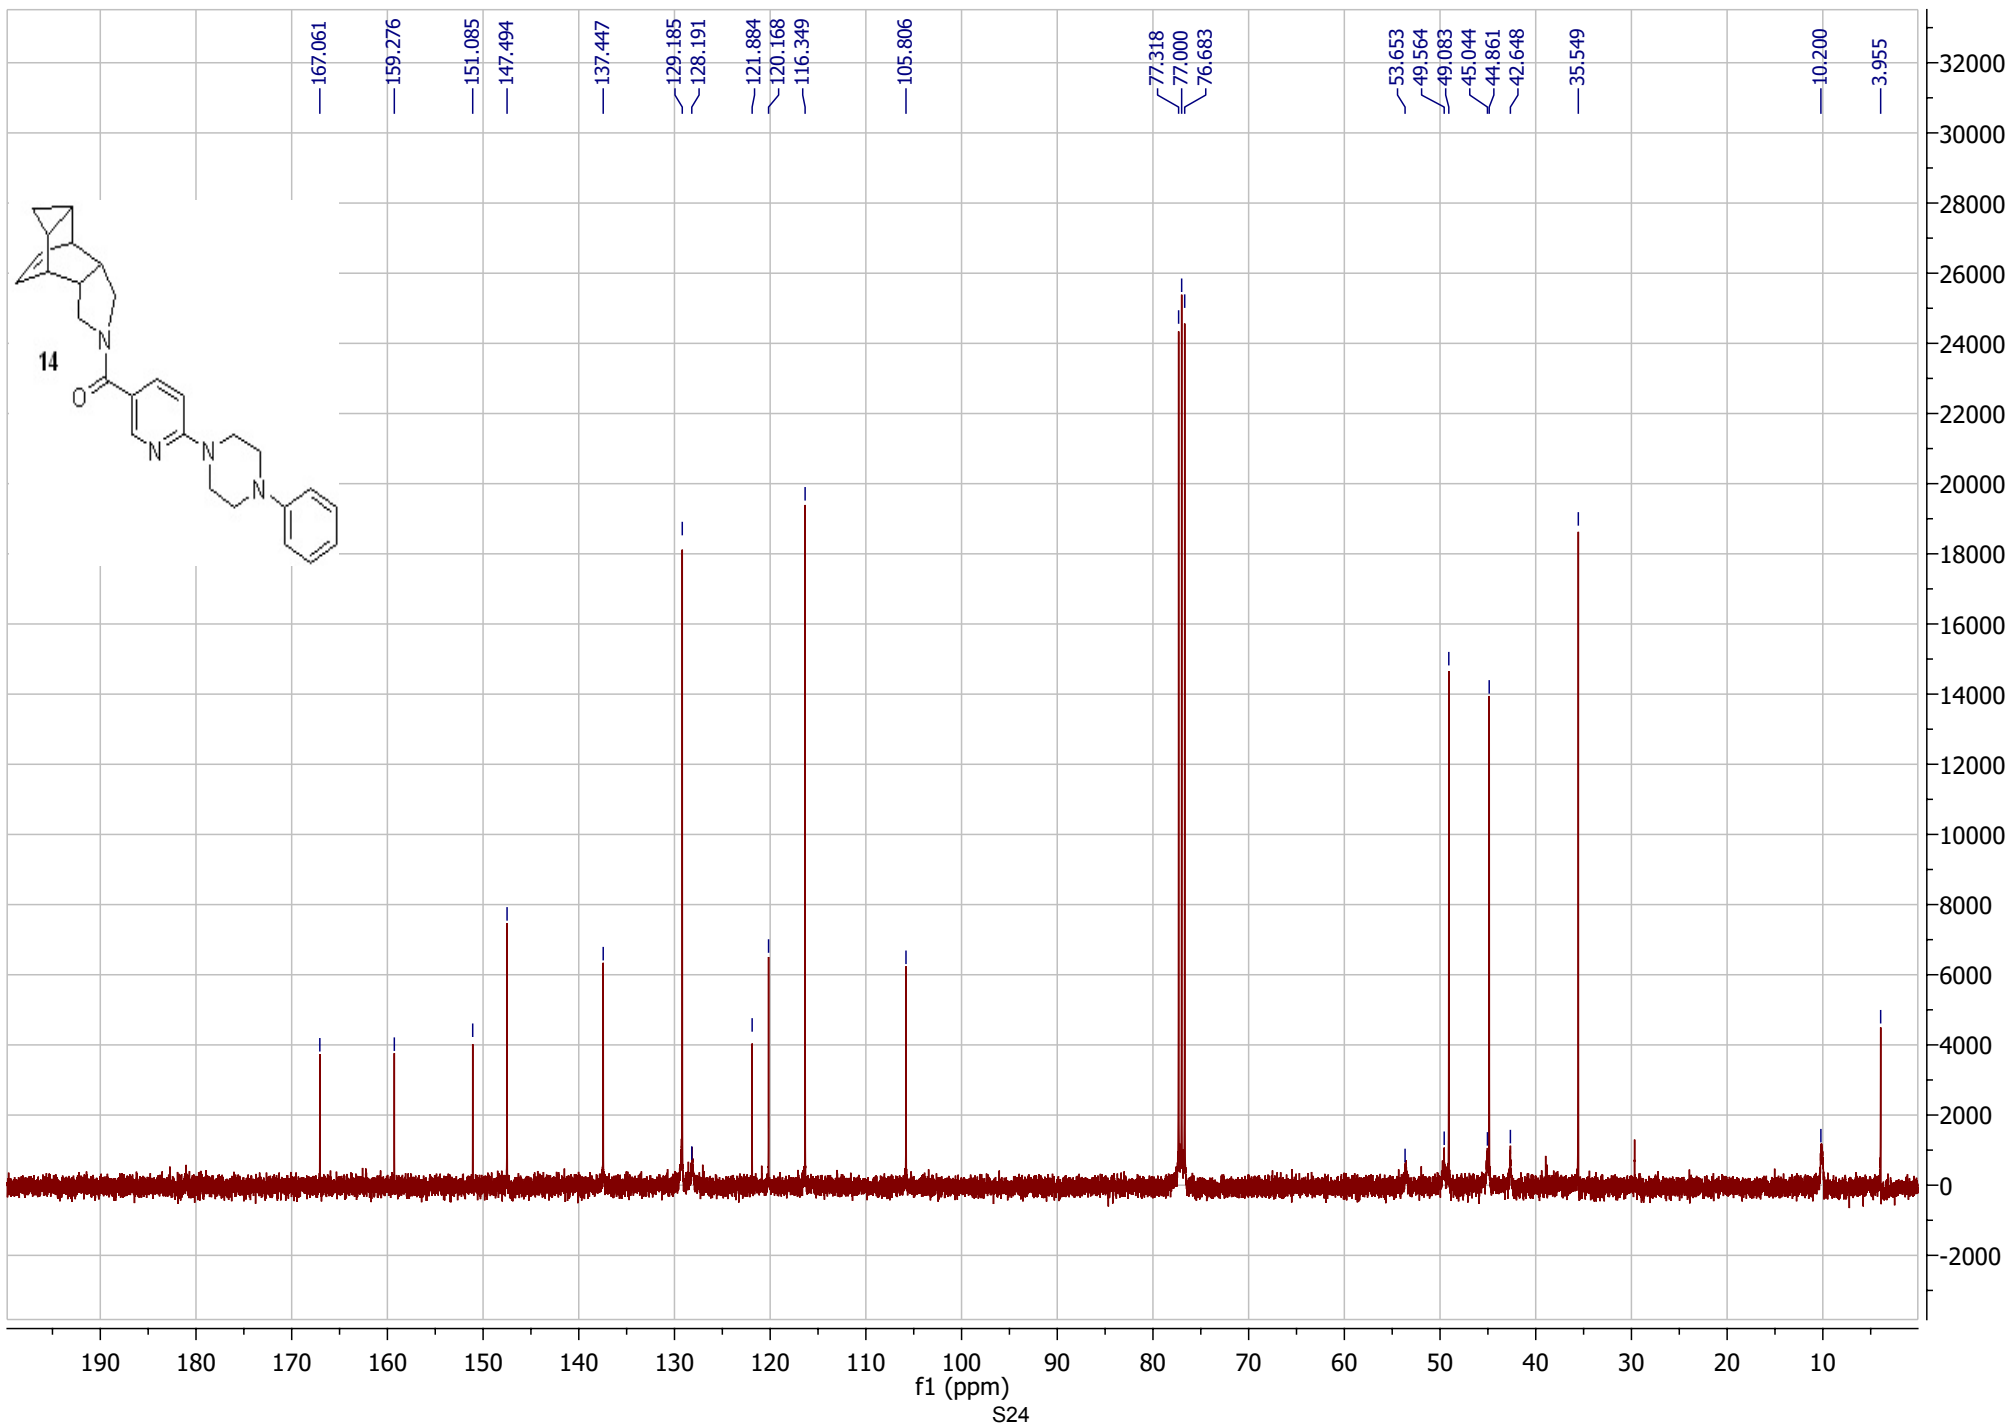



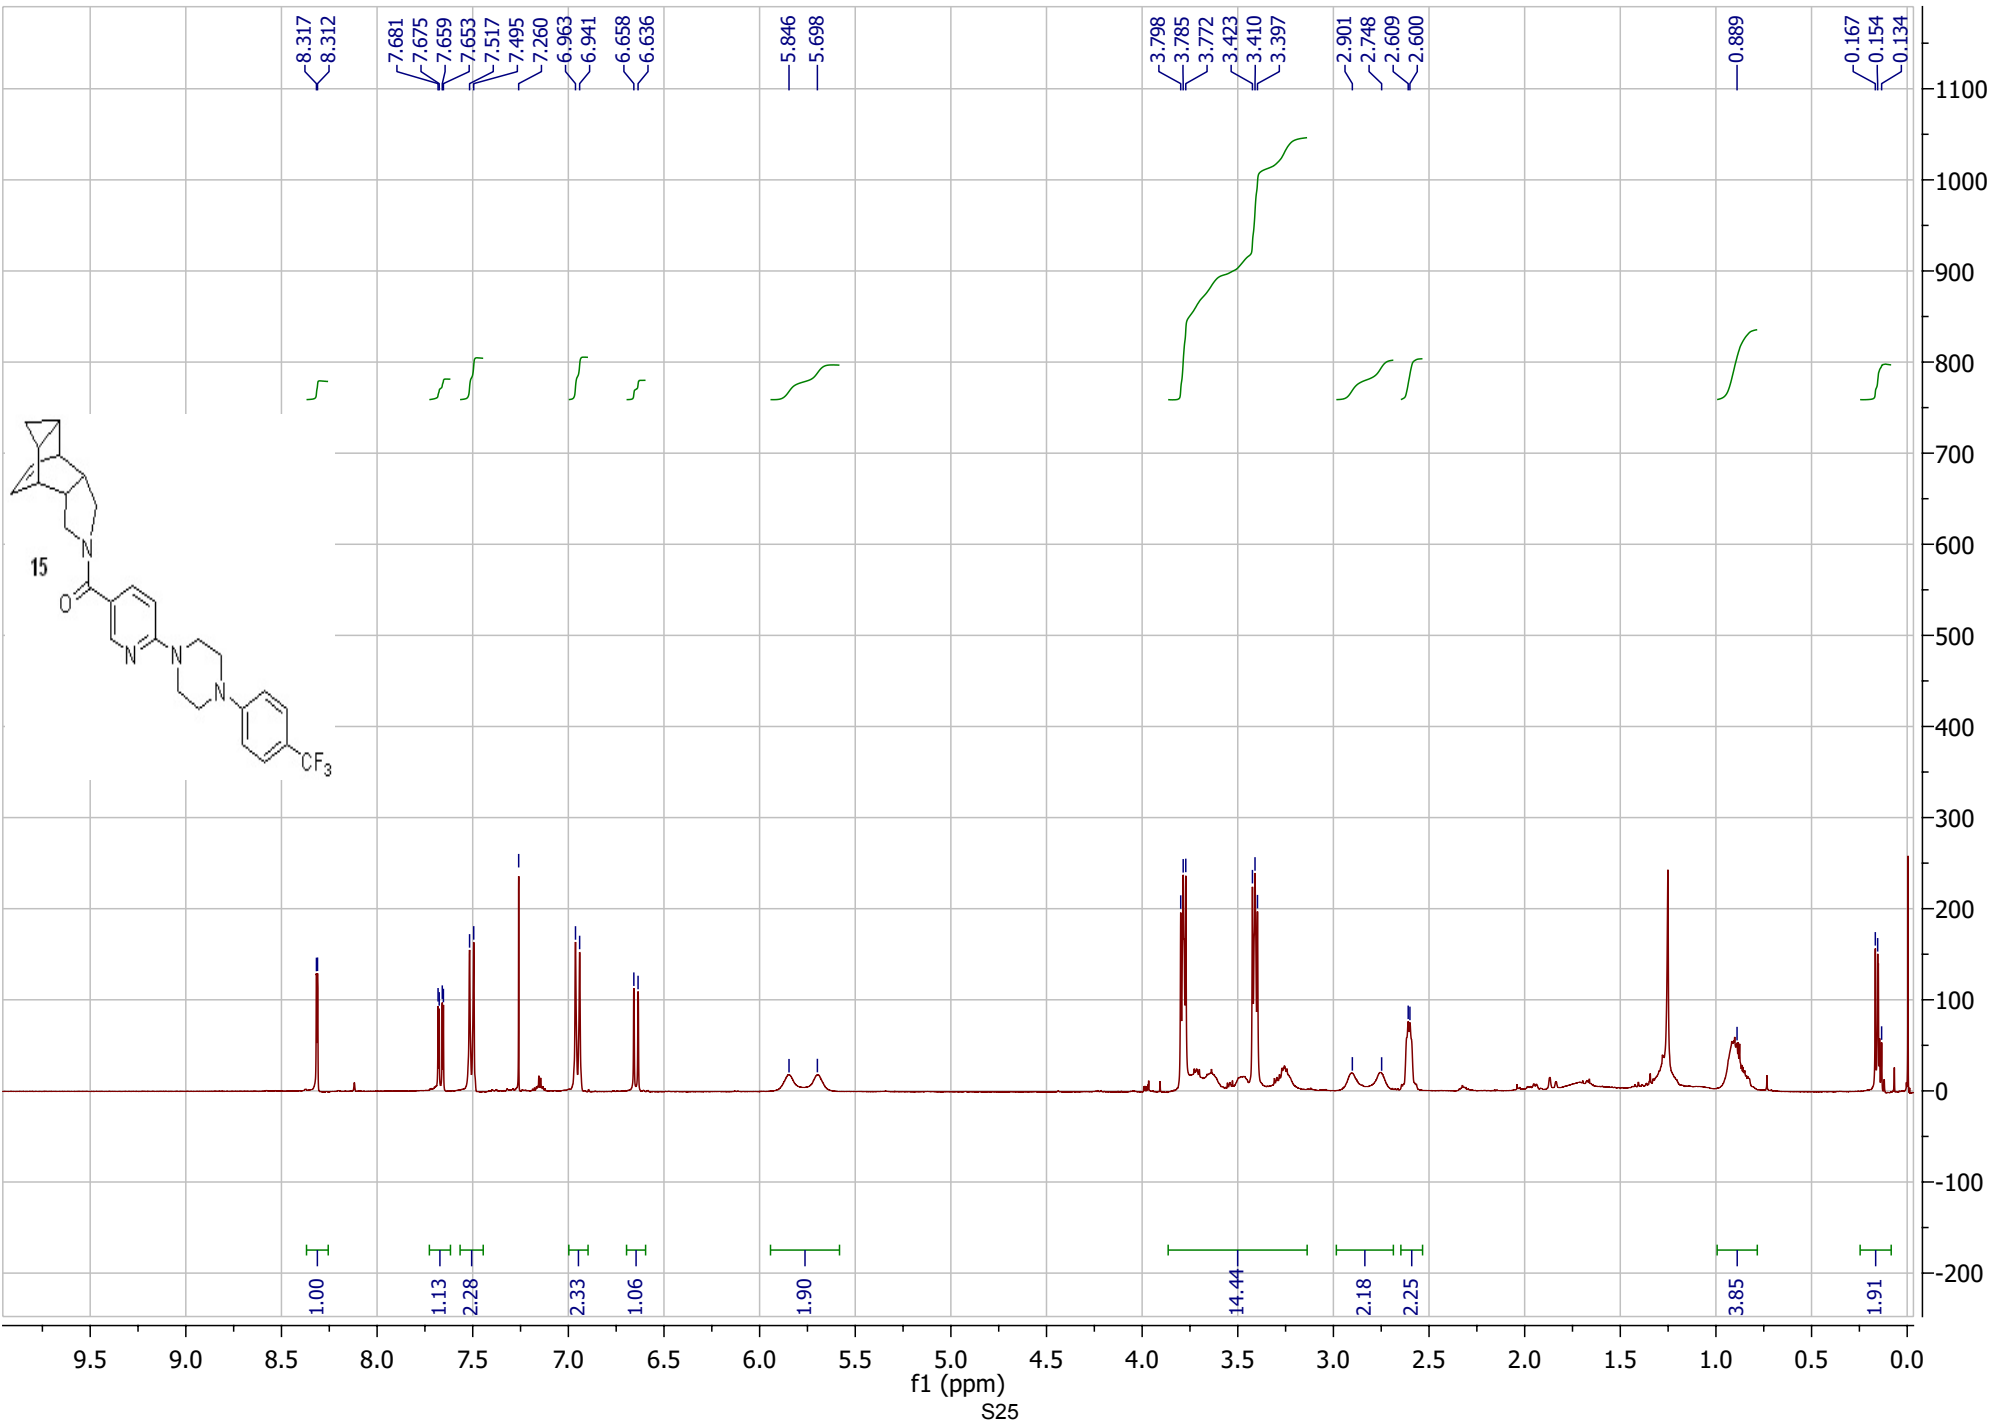

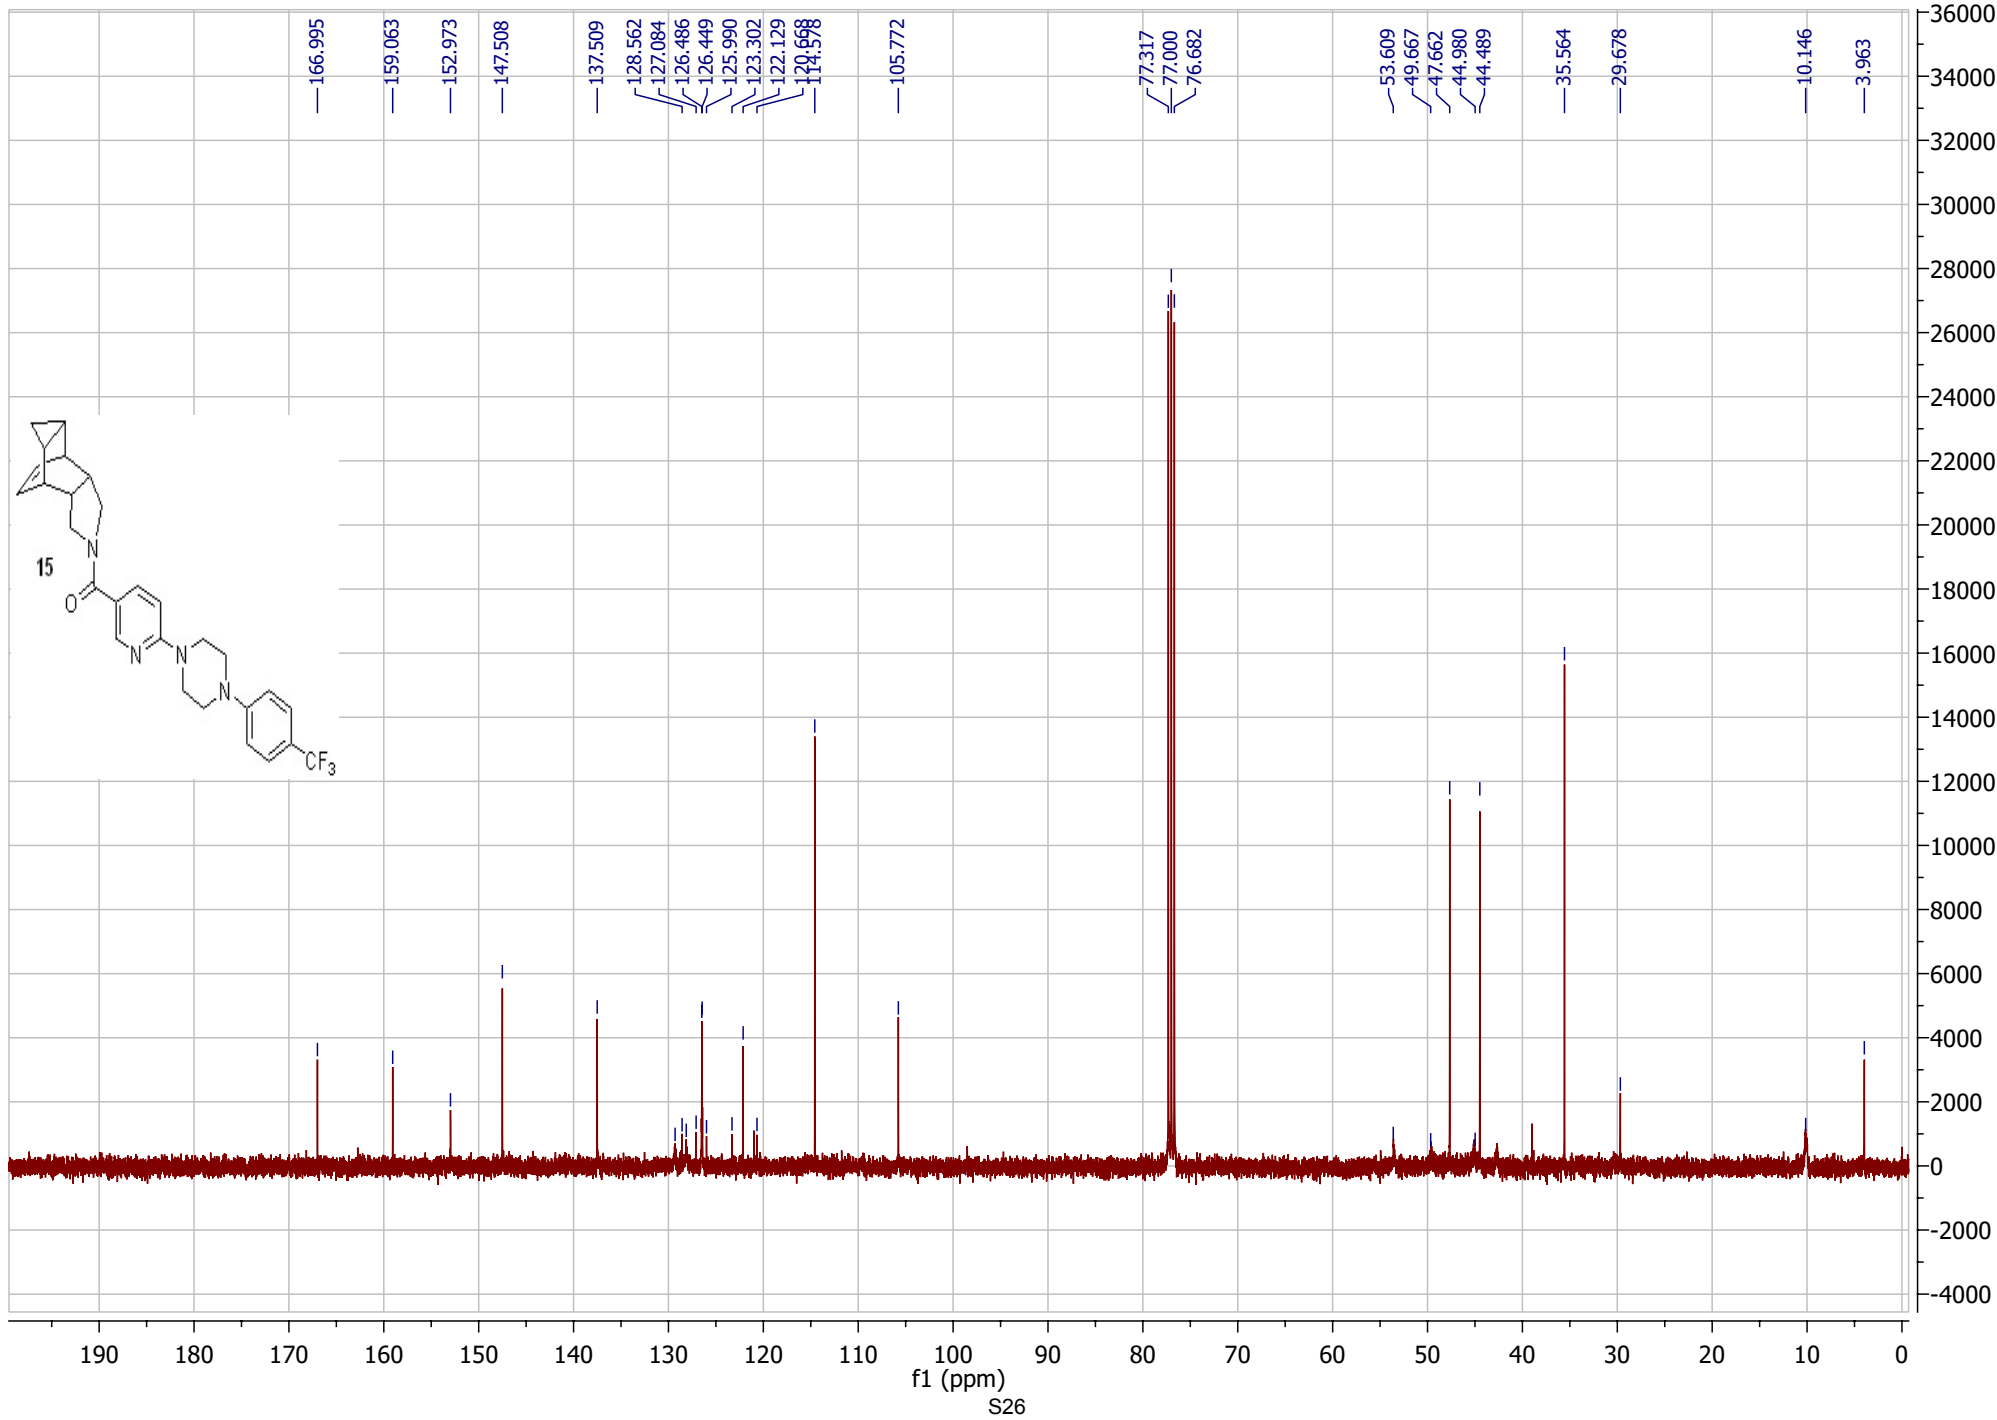

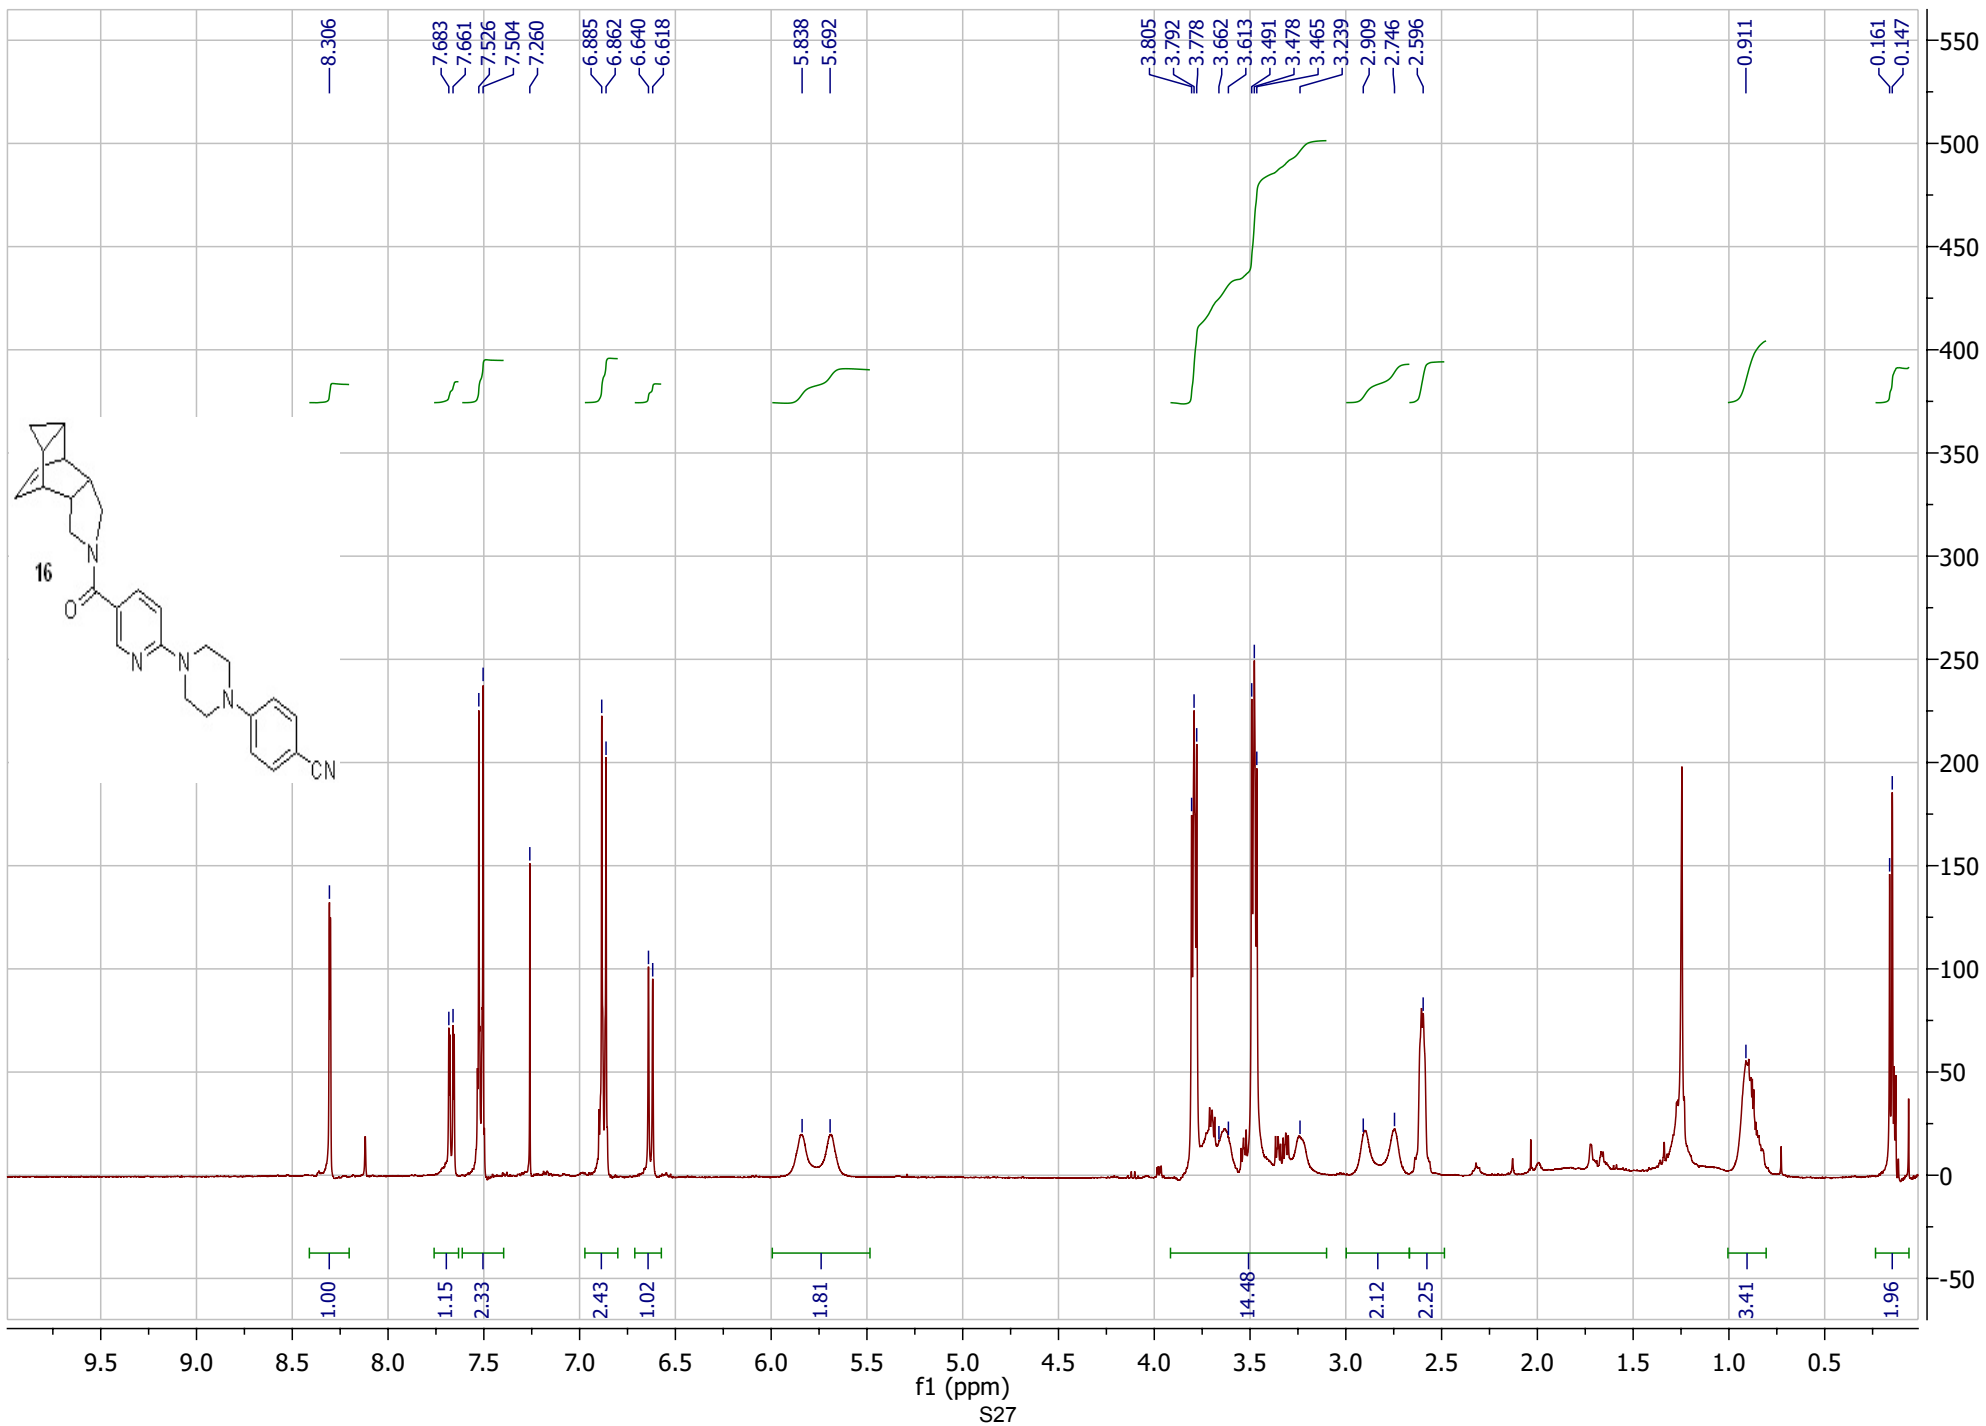

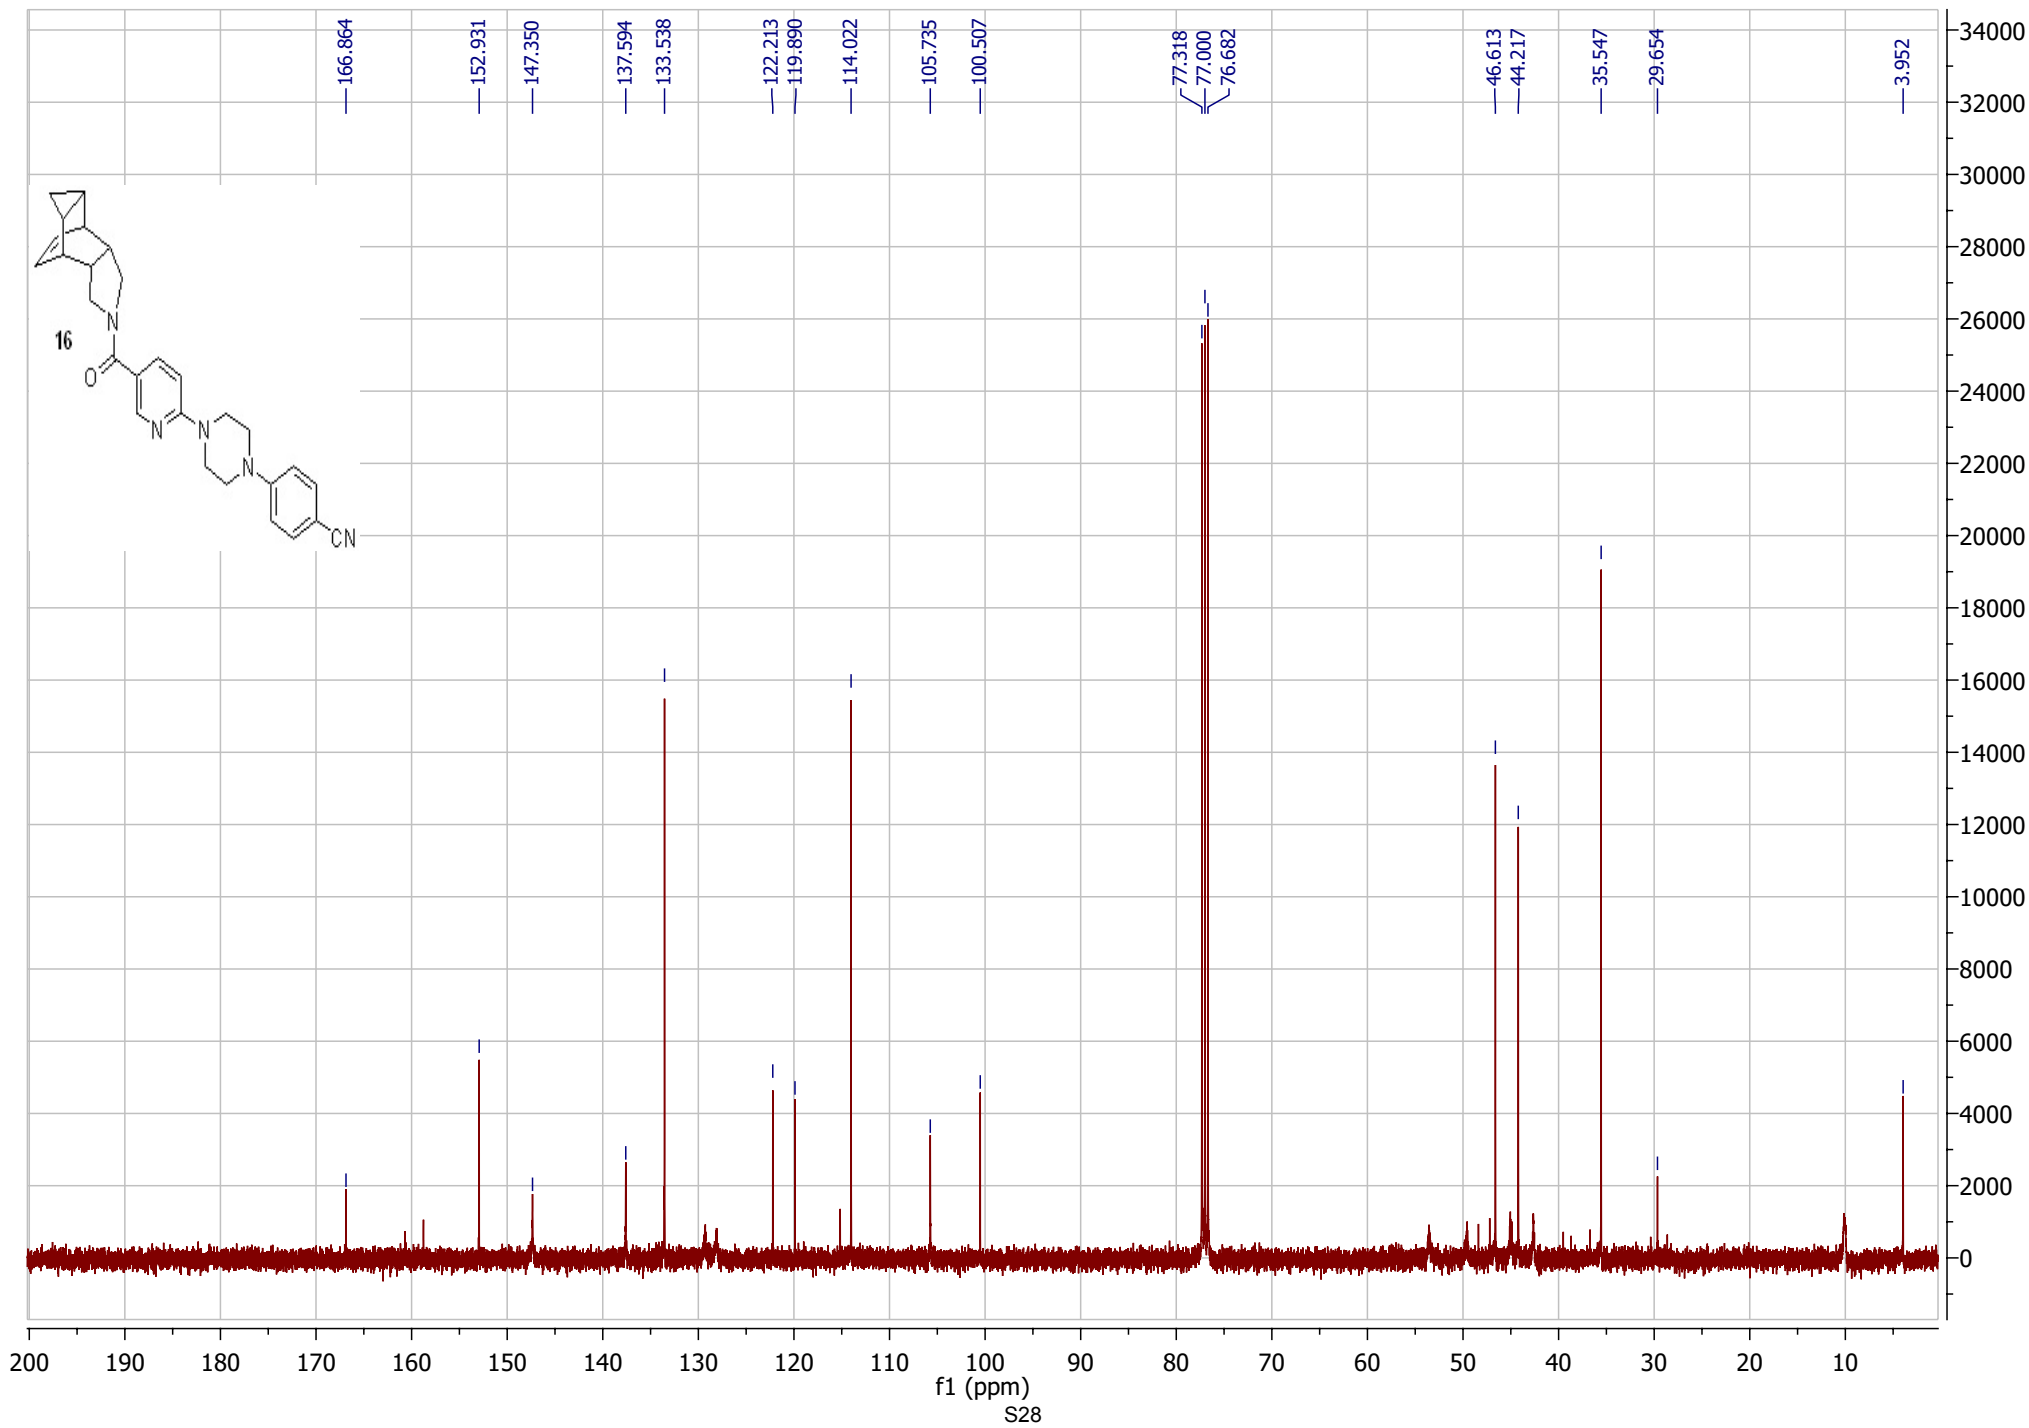

Supplement: molecules-23-00536-s001.pdf [file molecules-23-00536-s001.pdf]
